# Supplementary material for: Association between Hemoglobin Turnover Rate and Mortality in Septic Shock Patients
Source: Research Square preprint supplement (doi:10.21203/rs.3.rs-8689595/v1), 2026-02-22
Supplement: Supplementary file 1 [file a1d2c2b43e7a27a76151f0aa.docx]

**Supplement paper**

[Supplement Explicate. 3](#_Toc208573722)

[**1.Simplified Mathematical Model Based on Physiological Characteristics** 3](#_Toc208573723)

[**2.What is a “Blood Oxygen Unit”?** 4](#_Toc208573724)

[**3.Quantitative Framework for Perfusion-Metabolism Coupling** 5](#_Toc208573725)

[**4.Formulas and Transformation Process** 5](#_Toc208573726)

[**5.Feature Engineering** 8](#_Toc208573727)

[Supplement Methods. 13](#_Toc208573728)

[**1. Study frame** 13](#_Toc208573729)

[**2. Confounders** 14](#_Toc208573730)

[**3.Time Point Definition** 15](#_Toc208573731)

[**4.Propensity score overlap weighting** 15](#_Toc208573732)

[**5. Analytical file** 16](#_Toc208573733)

[**6.** **Software** 16](#_Toc208573734)

[**7. Missing Data Imputation** 17](#_Toc208573735)

[**8. Predictive Approaches to Treatment Effect Heterogeneity** 17](#_Toc208573736)

[Supplement Table 19](#_Toc208573737)

[**sTable 1. Description and Reference Ranges of Clinical Parameters** 19](#_Toc208573738)

[**sTable 2. Definition and Annotation** 19](#_Toc208573739)

[**sTable 3.** **Paired t-test Results for HTR Across Time Points** 20](#_Toc208573740)

[**sTable 4.** **Baseline characteristics and outcomes of non-severe liver disease** 20](#_Toc208573741)

[**sTable 5.** **Baseline characteristics and outcomes after PSM** 21](#_Toc208573742)

[**sTable 6.** **Effect of HTR on 7-Day Mortality Across Quartiles (at Admission).** 21](#_Toc208573743)

[**sTable 7.** **Effect of HTR on 7-Day Mortality Across Quartiles (Last Within 7d).** 25](#_Toc208573744)

[**sTable 8.** **Effect of HTR on 7-Day Mortality Across Quartiles (Overall).** 29](#_Toc208573745)

[**sTable 9.** **Model Fit Statistics for HTR Trajectories (3-5 Days &5-7 Days).** 33](#_Toc208573746)

[**sTable 10.** **Paired t-test Results for HTR Across Time Points.** 46](#_Toc208573747)

[Supplement Figure 48](#_Toc208573748)

[**sFigure 1.** **Depicts the flow of participants throughout the study.** 48](#_Toc208573749)

[**sFigure 2.** **Patient Enrollment and Key Measurement Time Points** 48](#_Toc208573750)

[**sFigure 3.** **Sensitivity Analyses for Robustness (Non-Severe Liver Disease)** 48](#_Toc208573751)

[**sFigure 4. Sensitivity Analyses for Robustness (Propensity Score Matching)** 49](#_Toc208573752)

[**sFigure 5.** **Subgroup Analysis (Severe Liver Disease)** 50](#_Toc208573753)

[**sFigure 6.** **Subgroup Analysis (Renal Disease)** 51](#_Toc208573754)

[**sFigure 7.** **Subgroup Analysis (Congestive Heart Failure)** 52](#_Toc208573755)

[**sFigure 8.** **Subgroup Analysis (Cancer)** 53](#_Toc208573756)

[**sFigure 9.** **Subgroup Analysis (Chronic Pulmonary Disease)** 54](#_Toc208573757)

[**sFigure 10.** **Subgroup Analysis (Diabetes)** 55](#_Toc208573758)

[**sFigure 11.** **Subgroup Analysis (BMI 18.5–24.9 kg/m²)** 56](#_Toc208573759)

[**sFigure 12.** **Subgroup Analysis (BMI ≥24.9 kg/m²)** 57](#_Toc208573760)

[**sFigure 13.** **Subgroup Analysis (age <60 years)** 58](#_Toc208573761)

[**sFigure 14.** **Subgroup Analysis (age ≥60 years)** 59](#_Toc208573762)

[**sFigure 15.** **Subgroup Analysis (gender-male)** 60](#_Toc208573763)

[**sFigure 16.** **Subgroup Analysis (gender-female)** 61](#_Toc208573764)

[**sFigure 17.** **Subgroup Analysis (Non-Cardiac Surgery)** 62](#_Toc208573765)

[**sFigure 18.** **Subgroup Analysis (No Surgery)** 63](#_Toc208573766)

[**sFigure 19.** **Subgroup Analysis (Dataset-MIMIC)** 64](#_Toc208573767)

[**sFigure 20.** **Subgroup Analysis (Dataset-HIS)** 65](#_Toc208573768)

[**sFigure 21.** **Subgroup trajectory analysis of HTR.** 66](#_Toc208573769)

# Supplement Explicate.

**1.Simplified Mathematical Model Based on Physiological Characteristics**

As the vascular system's fundamental functional unit, the microcirculation executes three cardinal physiological missions through its terminal arterioles-capillaries-venules continuum: 1) Real-time hemodynamic modulation of organ perfusion pressure and flow distribution; 2) Maintenance of tissue oxygen gradient homeostasis; 3) Bidirectional Transport of Metabolic Substrates and Waste Products.

Hemodynamically, cardiac pulsatility propagates through fractal microvascular networks, generating capillary erythrocyte laminar flow (0.3-1.0 mm/s) with self-organized "platoon-like" configurations. These hydrodynamic principles underpin our operational definition of the Blood Oxygen Unit (BOU)— a cylindrical functional domain bounded by adjacent erythrocyte midlines, encapsulating a complete erythrocyte and its plasma envelope.

**Figure. Schematic of Multiscale Circulatory-Metabolic Coupling Mechanism.**


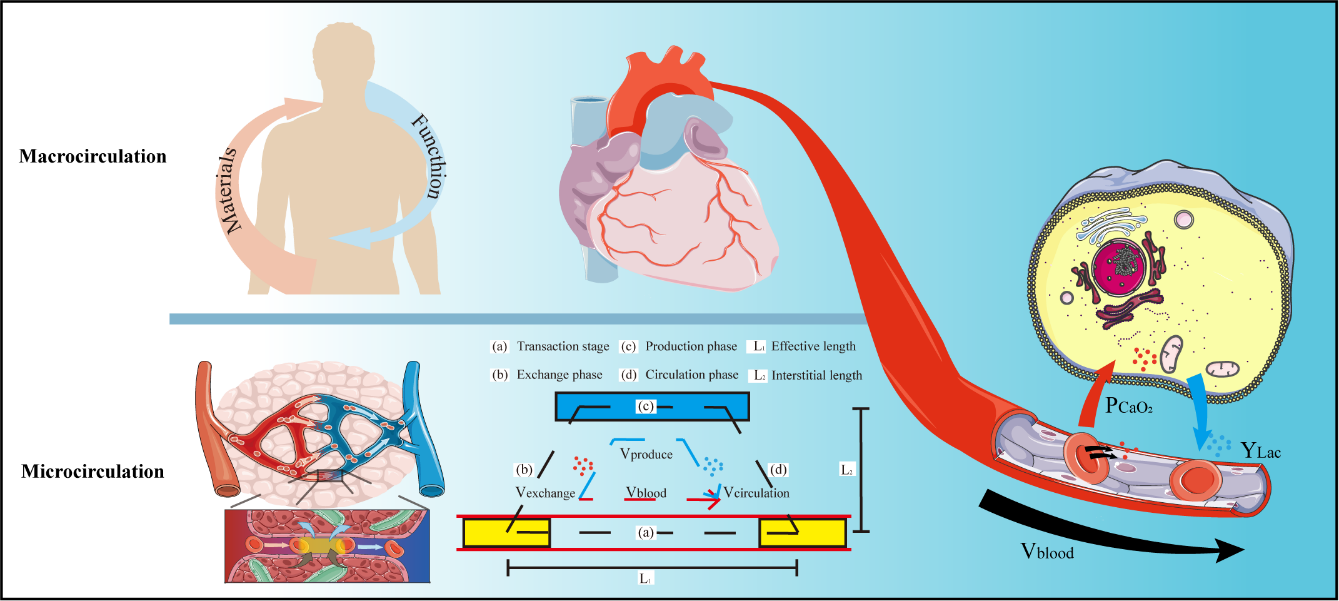


Notes：Macrocirculatory Layer: The Frank-Starling mechanism governs ventricular-vascular coupling to sustain systemic oxygen/nutrient delivery, while neurohumoral regulation maintains hemodynamic homeostasis. This layer provides kinetic energy for microcirculatory exchange. Microcirculatory Exchange Layer: Blood oxygen units traverse capillary networks at physiological flow velocities. Fick diffusion drives transmembrane substrate exchange (exchange phase), with subsequent cellular metabolic conversion (production phase) and efflux of functional products (circulation phase) back to macrocirculation.

**2.What is a “Blood Oxygen Unit”?**

The hydrodynamic principles governing blood flow dynamics define the BOU as a cylindrical functional domain bounded by adjacent erythrocyte midlines, encapsulating an erythrocyte and its associated plasma envelope. This irreducible physiological entity exhibits three cardinal characteristics: (1) non-substitutability, as rapid BOU regeneration is physiologically constrained without equivalent cellular or compositional alternatives; (2) holistic integration of erythrocytes, platelets, and foreign particulates into a coordinated functional matrix; and (3) dual-phase modulation where plasma expansion alters fluid dynamics rather than unit quantity.

The BOU demonstrates three intrinsic properties: hemorheological regulation (modulated by blood viscosity, vascular resistance, and pressure gradients), metabolic intermediation (delivering O2 and nutrients while removing waste), and bidirectional exchange capacity (facilitating transmembrane transfer of cytokines, metabolites, and signaling molecules). Functionally, it operates through five paradigms: rate calibration (standardizing O2 dissociation via hemoglobin allostery), energy transduction (ATP-coupled substrate delivery), value preservation (maintaining 90% erythrocytic functionality during 42-day storage), delayed reciprocity (platelet-derived growth factor banking for wound repair), and interspecies compatibility (exemplified by universal O-negative erythrocyte transfusions). These features position the BOU as a fundamental quantifier of circulatory efficacy and metabolic homeostasis.

**3.Quantitative Framework for Perfusion-Metabolism Coupling**

At the single-capillary scale, perfusion flux (*Q`*) is determined by the density of BOUs (*M`*) and their mean flow velocity (*V`*):

where *M* represents BOUs throughput, and *V* reflects erythrocyte deformation kinetics. Organ-scale perfusion (*Q*total) integrates microvascular network heterogeneity through parallel capillary summation:

Here, n denotes functional capillary density.

Tissue functional output arises from the spatiotemporal integration of energy metabolism and molecular exchange. Thus, the total functional output of a tissue region can be expressed as the product of functional units *Y* and their functional expression rate *P*. This yields the perfusion-metabolism coupling equation：

*Y* quantifies metabolically active functional units (e.g., lactate production), and *P* represents the metabolic rate coefficient. This framework bridges macroscale hemodynamic parameters with cellular metabolic dynamics, enabling quantitative analysis of microcirculatory efficiency.

**4.Formulas and Transformation Process**

Comparable metrics require homogeneity; while formulas exist, they are not universally applicable. This study classifies variables as components of the blood oxygen unit based on their ability to freely traverse membranes. Given the lack of real-time microcirculatory monitoring, clinically observable parameters were utilized for conversion.

**Perfusion-Metabolism Coupling**

**Unit Consistency:**

- *M*: Mean blood oxygen units undergoing capillary exchange (ideal unit: count; operationalized as erythrocyte count [×10⁹/L])
- *V*: Mean flow velocity through capillaries (ideal unit: m/s; measured as cardiac output [L/min])

**Homogeneity Principle:**

- *P* × *Y* maintains identical dimension (count/min)
- *Y*: Total functional output (ideal unit: count; clinical measures: ×10⁹/L, mg/L)

Unit Consistency and Homogeneity Principle ensure that both sides of the equation remain dimensionally equivalent. Consequently, the unit of *P* corresponds to the inverse of the observed metabolic product’s unit, multiplied by time.

It is important to emphasize that M represents the number of BOU units passing through the capillaries rather than the cardiac output value used in this study. In other words, the *P* value of functional units across different organs follows a discernible pattern. Assuming that total perfusion across organs remains constant, i.e., *M* × *V* is fixed:

Subscripts denote organ-specific parameters:

- 1, 2, 3: Distinct organ systems (e.g., hepatic, renal, cerebral)
- *M*: number of BOU flux through capillary beds
- *V*: Systemic perfusion velocity
- *P*: Organ-specific microcirculatory efficacy rate
- *Y*: Organ-specific functional units

Thus, when future studies achieve the observation of functional unit expression across multiple organs, the challenge of unit standardization arises. To address this, we introduce ¥ as the unit of *P* to ensure consistency in representation.

So, the parameter *P* quantifies the composite rate of functional unit processing through three sequential phases:

- Exchange Phase (b): Transmembrane influx via Fickian diffusion (V∝ΔC)
- Production Phase (c): Cellular metabolic conversion
- Circulation Phase (d): Functional output egress.

Now, let us consider a fundamental scenario: assuming that a single blood oxygen unit (*M* = 1) traverses a capillary of length L1 at a velocity of *V*blood, facilitating the exchange of substances and yielding one unit of functional material (*Y* = 1). In this process, nutrient transfer consists of three stages: (b) Exchange Phase, (c) Production Phase, and (d) Circulation Phase. Temporally, the influx of functional material must be completed before the BOU exits.

Given that diffusion is primarily driven by concentration gradients (Fick's law of diffusion), we assume that the exchange rates during stages (b) and (d) remain constant at *V*2, while the processing time in stage (c) is relatively stable at T0. Under these conditions, the perfusion efficiency *P* is expressed as:

- *L*1: Functional capillary length (m)
- *L*2: Transendothelial diffusion path (m)
- *V*2: Effective diffusion velocity (m/s)
- *T*0: Mean metabolic processing time (s)

In real-world scenarios, the relationships embedded within the *P* value are inherently complex. When edema resolves and diffusion accelerates, *P* increases while *Y* remains unchanged or increases correspondingly; the opposite occurs under adverse conditions. A decrease in *L*1 not only reduces *P* but also leads to a decline in *Y*, as seen in obstructive shock.

Fundamentally, *M* and *Y* represent cyclical behaviors of microcirculatory and cellular systems, respectively. The realization of certain functions exhibits variability in the *M*/*Y* ratio—generally, more complex functional processes require more stable and prolonged circulatory support. Additionally, while microcirculation and cellular metabolism are interdependent, their coupling is frequent but not absolute. Since *P* is derived from theoretical equations, extreme values may emerge when these two systems become uncoupled or significantly mismatched.

**Pathophysiological Modulation:**

| Condition | *P* Dynamics | *Y* Response | Clinical Paradigm |
| --- | --- | --- | --- |
| Edema Resolution | ↑ (L2↓, V2↑) | Stable/↑ | capacity optimization |
| Microvascular Obstruction | ↓ (L1↓) | ↓ | Obstructive shock |
| Cellular Production Impairment | ↓ (T0↑) | ↓ | Mitochondrial Uncoupling |
| Metabolic Decoupling | Extreme values | Discordant | Sepsis |

Note: ↑/↓: Directional change in parameter;

**5.Feature Engineering**

As the core of the BOU concept, red blood cells are central to functional characterization, particularly in the transport of oxygen and carbon dioxide. This function primarily depends on hemoglobin, which therefore serves as the principal observational marker at the BOU level, complemented by analysis of its downstream metabolic product—bilirubin. Based on this model, further examination of the tensions and constraints that BOUs encounter between systemic circulation and their intrinsic metabolic cycle is of critical importance.

**The Intrinsic Metabolic Cycle of Red Blood Cells**

Erythropoiesis occurs in the bone marrow, typically within “erythroblastic islands” formed by macrophages. Under the stimulation of interleukin-3 (IL-3), multipotent hematopoietic stem cells differentiate into burst-forming unit–erythroid cells (BFU-E), which subsequently develop into colony-forming unit–erythroid cells (CFU-E). Driven by the synergistic effects of erythropoietin (EPO), stem cell factor (SCF), insulin-like growth factors (IGFs), glucocorticoids, IL-3, and IL-6, CFU-E cells further differentiate into proerythroblasts.

Proerythroblasts sequentially mature into basophilic, polychromatic, and orthochromatic erythroblasts. With successive divisions, cell size decreases while hemoglobin content in the cytoplasm progressively increases. At the orthochromatic stage, mitosis ceases, the nucleus condenses and is eventually extruded, giving rise to reticulocytes.

Enucleated red blood cells are a hallmark of mammals. Loss of the nucleus enhances their capacity for hemoglobin storage and confers superior deformability, enabling passage through capillaries narrower than their own diameter without structural damage. The transition from BFU-E to reticulocyte requires approximately 7–9 days. Reticulocytes remain in the bone marrow for 24–48 hours before entering circulation, where they complete maturation within another 24–48 hours to become fully functional biconcave erythrocytes. Some final maturation may occur in the spleen. While incapable of further division, reticulocytes continue hemoglobin synthesis until fully matured.

Mature erythrocytes have a lifespan of about 120 days, after which they are cleared by the reticuloendothelial system of the liver, spleen, and bone marrow. Hemoglobin is degraded into indirect bilirubin, which is subsequently converted in the liver to direct bilirubin and excreted in bile. Approximately 80–85% of bilirubin derives from senescent RBCs, 10–15% from immature erythroid cells in the bone marrow, and 1–5% from hepatic heme proteins.

Erythropoiesis is tightly regulated, with EPO serving as the key mediator, mainly secreted by the hypoxic kidney and to a lesser extent by bone marrow cells. Thyroid hormones, growth hormone, and glucocorticoids enhance EPO activity, whereas inflammatory cytokines such as IL-1 and TNF act as inhibitors.

We assume that under physiological steady-state conditions, the number of red blood cells produced equals the number removed through senescence and clearance. Accordingly, the rate of bilirubin formation can be approximated as being proportional to the rate of RBC turnover, expressed by a constant coefficient *a*, such that:

Integrating both sides with respect to time t, we obtain:

where C is an integration constant. Ideally, this suggests that the absolute value of hemoglobin and that of total bilirubin are linearly related.

Let the degradation rate of hemoglobin be denoted as *A*：

**Macrocirculation**

Within a single macrocirculatory cycle, a BOU contains a defined number of red blood cells together with a corresponding bilirubin load, which is propelled by the heart and distributed throughout the systemic microcirculatory network. Denoting the total number of BOUs in the body as *M*, the fraction passing through the liver is represented as *M*liver with an associated blood flow rate *V*liver. During circulation, bilirubin contained within BOUs is taken up and metabolized by hepatocytes. The portion removed from BOUs in this process is defined as *Y*, and the hepatic clearance efficiency of bilirubin in a given cycle, *P*, can thus be expressed as:

Under homeostatic conditions, the total bilirubin cleared by the liver (*Y*liver) is proportional to the number of red blood cells undergoing senescence and clearance, with a value equal to this number divided by the growth coefficient a. Although hepatic perfusion can be partly maintained even under extreme conditions such as shock, variation in blood flow distribution and velocity across macrocirculatory cycles renders hepatic clearance efficiency (*P*liver) particularly critical.

**Microcirculation and Cellular Metabolism**

As elaborated in Supplement Explicate 4, *P*liver represents the mean functional output of all hepatocytes per unit time. Disruptions at distinct metabolic phases lead to characteristic changes in *P*: impaired Exchange Phase (hemolytic jaundice), impaired Production Phase (hepatocellular jaundice), and impaired Circulation Phase (cholestatic jaundice), each typically manifesting as an increase in *P*. For ease of discussion, subsequent analyses will disregard quantitative relationships among the substances.

Strictly speaking, a single red blood cell contains approximately 2.7-3.0 ×108 hemoglobin molecules. This can be estimated as:

where *b* is the reciprocal of the Mean Corpuscular Hemoglobin (MCH), and *c* denotes the fraction of total hemoglobin carried through the liver relative to the whole body.

By integrating the above expressions, we obtain a consolidated equation：

The *Total Bilirubin* extracted from arterial blood represents the residual fraction from the previous cycle after production and clearance. Meanwhile, *Total Bilirubin* concentration remains stable across cycles:

*Hemoglobin* is maintained at a relatively stable level in the body, reflecting a balance between its synthesis and degradation.

which after simplification yields the Hemoglobin Turnover Rate (HTR):

**Disease Progression and Therapeutic Approaches**

Current laboratory methods cannot directly capture the magnitude of changes or the associated reaction rates, making it difficult to resolve the above equation. In brief, under physiological homeostasis, the HTR is expected to remain relatively stable. When homeostasis is perturbed or under extreme conditions, HTR may fluctuate and generally increases. It should be emphasized that the derivation above assumes an idealized steady-state model; in pathological contexts such as hemolysis or sepsis, HTR dynamics become considerably more complex.

# Supplement Methods.

**1. Study frame**

This observational study used a multicenter real-world cohort to assess the independent association between exposure and outcomes, controlling for potential confounders through multivariable adjustment and propensity score methods.

**(1) Background:** Septic shock is associated with high mortality in ICUs, and early prognostic markers are essential for guiding therapy. HTR, reflecting hemoglobin metabolism and bilirubin clearance, may capture dynamic physiological changes not reflected by conventional indicators.

**(2) Objective:** To investigate whether baseline HTR and early HTR trajectories are independently associated with 7-day mortality in patients with septic shock.

**(3) Design:** Multicenter, real-world, retrospective cohort study. Sequential laboratory data were collected during the first 7 days of ICU admission. Restricted cubic splines (RCS) evaluated nonlinear associations of single time-point HTR with mortality, and group-based trajectory modeling (GBTM) identified latent patient subgroups with similar HTR progression patterns.

**(4) Population:** Adult ICU patients diagnosed with septic shock within 48 hours of admission, with available hemoglobin and bilirubin measurements. Patients with severe chronic hematologic disorders or missing key covariates were excluded.

**(5) Exposure and Outcomes:**

**Exposure:** Septic shock.

**Primary Outcome:** All-cause mortality.

**Covariates:** Baseline demographics (age, gender, height, weight, BMI), disease severity (SOFA score), comorbidity burden (CCI score, hypertension, diabetes, liver disease, peripheral vascular disease, etc.), population categories, and treatment center.

**(6) Statistical Analysis:** RCS modeled continuous HTR associations with mortality, adjusting for baseline covariates. GBTM classified HTR trajectories into latent groups, and multivariable regression assessed their independent association with mortality. Sensitivity analyses excluded patients with severe liver disease and applied propensity score methods to control for confounding. Missing data were handled by multiple imputation.

**(7) Results (anticipated / main finding):** Higher baseline HTR and upward HTR trajectories over the first 7 days were independently associated with increased 7-day mortality, after adjustment for demographic and clinical confounders.

**(8) Conclusion:** In real-world ICU patients with septic shock, baseline HTR and its early trajectory provide independent prognostic information. Monitoring HTR dynamics may facilitate early risk stratification and individualized management.

**2. Confounders**

Baseline confounders included age, sex, height, weight, BMI, SOFA score, CCI score, comorbidities (hypertension, diabetes, liver disease, peripheral vascular disease, and coronary artery disease), population categories, and treatment center. Variables with a *p* value <0.05 in univariable analysis were entered into the multivariable models.

In the RCS analyses, three models were specified: Model 1 unadjusted; Model 2 adjusted for all covariates significant in univariable analysis; and Model 3 adjusted for all prespecified baseline confounders. Adjusted results across subgroups are presented:

| Population | Adjusted Variables |
| --- | --- |
| All patients | admission age, severe liver disease, chronic pulmonary disease, congestive heart failure, diabetes, renal disease, cancer, Charlson comorbidity index, SOFA, population categories, dataset |
| NC | dataset, gender, admission age, chronic pulmonary disease, congestive heart failure, renal disease, Charlson comorbidity index, SOFA |
| NS | admission age, cancer, Charlson comorbidity index, SOFA |
| MIMIC | admission age, congestive heart failure, diabetes, renal disease, cancer, Charlson comorbidity index, SOFA, population categories |
| HIS | admission age, weight, severe liver disease, chronic pulmonary disease, diabetes, renal disease, cancer, Charlson comorbidity index, SOFA, population categories, BMI |
| Severe liver disease | admission age, diabetes, Charlson comorbidity index, SOFA, BMI |
| Diabetes | dataset, admission age, chronic pulmonary disease, renal disease, Charlson comorbidity index, SOFA, population categories |
| PSM | gender, admission age, height, weight, severe liver disease, chronic pulmonary disease, congestive heart failure, diabetes, renal disease, cancer, Charlson comorbidity index, SOFA, population categories, BMI |
| BMI ≥24.9 | dataset, admission age, severe liver disease, chronic pulmonary disease, diabetes, renal disease, cancer, Charlson comorbidity index, SOFA, population categories |
| 18.5 < BMI < 24.9 | dataset, gender, admission age, weight, chronic pulmonary disease, diabetes, renal disease, cancer, Charlson comorbidity index, SOFA, population categories |
| Male | dataset, admission age, weight, severe liver disease, chronic pulmonary disease, diabetes, renal disease, cancer, Charlson comorbidity index, SOFA, population categories, BMI |
| Female | dataset, admission age, weight, severe liver disease, chronic pulmonary disease, diabetes, renal disease, cancer, Charlson comorbidity index, SOFA, population categories, BMI |
| Age >60 | dataset, weight, chronic pulmonary disease, congestive heart failure, diabetes, renal disease, Charlson comorbidity index, SOFA, population categories, BMI |
| Age ≤60 | dataset, weight, severe liver disease, congestive heart failure, diabetes, cancer, Charlson comorbidity index, SOFA, population categories, BMI |
| Chronic pulmonary disease | admission age, renal disease, cancer, Charlson comorbidity index, SOFA |
| Renal disease | admission age, congestive heart failure, Charlson comorbidity index, SOFA |
| Cancer | dataset, BMI, weight, chronic pulmonary disease, Charlson comorbidity index, SOFA |
| Congestive heart failure | dataset, admission age, severe liver disease, chronic pulmonary disease, diabetes, renal disease, Charlson comorbidity index, SOFA, population categories |
| Non-severe liver disease | admission age, chronic pulmonary disease, congestive heart failure, diabetes, renal disease, cancer, Charlson comorbidity index, SOFA, population categories, dataset |

**3.Time Point Definition**

Precise time-point definitions are essential in multicenter observational studies to ensure data consistency and comparability across centers. In this study, two key time points were defined: ICU admission and outcome time. Physiological variables were recorded with timestamps in seconds.

Baseline variables were defined as clinical data available at ICU admission. These included demographics (age, sex, height, weight, and BMI), comorbidities [Charlson Comorbidity Index (CCI) score, hypertension, diabetes, liver disease, peripheral vascular disease, shock, and coronary artery disease]. Clinical and laboratory data were collected to calculate disease severity and SOFA scores, and all hemoglobin and bilirubin measurements were recorded until discharge. Comorbidities were defined using International Classification of Diseases, Tenth Revision (ICD-10) codes.

**4.Propensity score overlap weighting**

Propensity score overlap weighting was employed to control for confounding between treatment groups. Unlike propensity score matching, which may exclude patients with extreme propensity scores, overlap weighting retains the entire study population while emphasizing individuals with the greatest clinical equipoise. Each subject was weighted by the probability of being assigned to the opposite treatment group (i.e., 1–PS for the treated group and PS for the control group), effectively minimizing covariate imbalance and maximizing efficiency in estimating average treatment effects in the overlapping region. This approach has been shown to yield exact balance in measured covariates and is particularly well-suited for comparative effectiveness research in observational settings.

To adjust for potential confounders, we used overlap weighting based on propensity scores, implemented via logistic regression:

This model denotes the propensity score, i.e., the probability of receiving treatment T = 1 given covariates X. And we estimated the propensity score using a multivariable logistic regression model:

Where *T* is the treatment indicator (mark, 1 for treated, 0 for control), Covariates include demographics, comorbidities, laboratory and physiological parameters.

After estimating the PS for each individual, we calculated overlap weights as:

These weights give greater emphasis to individuals with a high probability of receiving either treatment and reduce influence from extreme scores, improving covariate balance in the region of common support.

The final weighted cohort was used to construct a survey design object via the svydesign() function in R, with weights incorporated in subsequent outcome modeling and statistical inference

**5. Analytical file**

All time-varying confounders, censoring indicators, and outcome indicators were aligned to the time of randomization and structured according to the predefined time-splitting strategy. The final analytic dataset was organized in a wide format, with one row per patient, including columns for all baseline covariates as well as time-varying confounders, outcomes, and censoring indicators. A complete tutorial on how this dataset was constructed is publicly available on GitHub: https://github.com/123Tangsiyu/Association-between-Hemoglobin-Turnover-Rate-and-Mortality-in-Septic-Shock-Patients/tree/main.

**6.** **Software**

Data were analyzed using R version 4.1.0 (R Foundation for Statistical Computing, Vienna, Austria). The following R packages were used for data management, visualization, and statistical modeling: tidyverse, dplyr, tidyr, data.table, foreign, rms (for restricted cubic splines), lcmm (for latent class mixed models), survival, survminer, survey, lme4, Matching, MatchIt, nonrandom, boot, parallel, doParallel, missForest, tableone (for baseline tables), ggplot2, ggpubr, gghalves (half-violin plots), ggsignif (p-values), ggsci, scales, cowplot, patchwork, RColorBrewer, splines, and lattice.

All statistical tests were two-sided, and a P value <0.05 was considered statistically significant unless otherwise specified.

**7. Missing Data Imputation**

Missing values were imputed using the missForest algorithm, a nonparametric random forest–based method for mixed-type data, with parallelization across 15 cores (parallelize = "forests"). Out-of-bag error estimates yielded an NRMSE of 0.172 for continuous variables and a PFC of 0.024 for categorical variables, indicating acceptable accuracy. Missingness was primarily observed in height (n = 2,096) and weight (n = 334). The imputed dataset (mf_result$ximp) was used for all subsequent analyses.

**8. Predictive Approaches to Treatment Effect Heterogeneity**

The Predictive Approaches to Treatment Effect Heterogeneity (PATH) Statement recommends a multivariable modeling framework that estimates the risk of clinical outcomes based on individual-level characteristics. This approach stratifies patients into different risk groups according to their predicted risk, and then examines the heterogeneity of treatment effects across these strata. The PATH framework outlines five key steps:

**(1) Define the research objective**：This cross-sectional study aimed to examine whether the hemoglobin turnover rate (HTR) is associated with short-term mortality, and to further explore whether distinct latent trajectory subgroups of HTR exist.

**(2) Identify and prepare the relevant datasets:** Data were obtained from three critical care databases, including MIMIC and our institutional HIS. Standard preprocessing steps included outlier handling, missing data imputation, variable normalization, and covariate harmonization.

**(3) Develop a predictive model for the outcome of interest:** Multivariable regression and flexible modeling approaches (restricted cubic splines [RCS], generalized additive models [GAM]) were used to characterize potential non-linear associations between HTR and outcomes. Candidate predictors were selected a priori based on clinical relevance, including demographics, comorbidities, severity scores, and laboratory measurements.

**(4) Estimate effect sizes:** For cross-sectional analyses, patients were stratified into quartiles of HTR, and odds ratios (ORs) with p for trend were estimated. For continuous analyses, group-based trajectory modeling was applied to identify HTR trajectories, and associations with outcomes were examined across subgroups.

**(5) Present and interpret the results:** RCS modeling, trajectory analyses, and subgroup stratifications consistently demonstrated that elevated baseline HTR and rising HTR trajectories were independently associated with an increased risk of short-term mortality

# Supplement Table

**sTable 1. Description and Reference Ranges of Clinical Parameters**

| **Variable** | **Description** | **Unit** | **Reference Range** |
| --- | --- | --- | --- |
| Gender, Male (%) | Proportion of male patients | % | N/A |
| Age | Age at ICU admission | years | 18–100 |
| Height | Body height | cm | 150–190 |
| Weight | Body weight | kg | 40–100 |
| BMI | Body mass index (weight/height²) | kg/m² | 18.5–24.9 |
| SOFA score | Sequential Organ Failure Assessment score | – | 0-24 |
| CCI score | Weighted index for chronic disease burden | – | 0-10+ |
| Total Bilirubin | Serum total bilirubin concentration | mg/dL | 0.2-1.2 mg/dL |
| Hemoglobin | Hemoglobin concentration | g/dL | 13.5-17.5(Male)  12.0-15.5(Female) |
| HTR | Hemoglobin-to-Total Bilirubin Ratio | - | N/A |
| Diabetes | Presence of diabetes mellitus | % | N/A |
| Renal disease | Presence of chronic kidney disease | % | N/A |
| Cancer | History of malignancy | % | N/A |
| Severe liver disease | Cirrhosis or hepatic failure | % | N/A |
| Chronic pulmonary disease | COPD or similar chronic lung diseases | % | N/A |
| Congestive heart failure | Diagnosed heart failure with symptoms | % | N/A |
| Peripheral vascular disease | Diagnosed peripheral artery disease | % | N/A |
| Cardiac Surgery | Patients undergoing cardiac surgery | % | N/A |
| Non-Cardiac Surgery | Patients undergoing non-cardiac surgery | % | N/A |
| No Surgery | Patients without surgical intervention | % | N/A |

Note: BMI = Body Mass Index; CCI = Charlson Comorbidity Index; SOFA= Sequential Organ Failure Assessment; HTR = Hemoglobin Turnover Rate.

**sTable 2. Definition and Annotation**

| **Items** | **Definition** | **Annotation** |
| --- | --- | --- |
| Septic shock | Sepsis with persistent hypotension requiring vasopressors to maintain a mean arterial pressure ≥65 mmHg and a serum lactate level >2 mmol/L despite adequate fluid resuscitation | Standard Sepsis-3 definition |
| All-cause mortality | Death from any cause during hospitalization or follow-up period | Reflects the overall prognosis of the patient. |

**sTable 3.** **Paired t-test Results for HTR Across Time Points**

| Group | At Admission | Last Within 7d | *P*-value |  |
| --- | --- | --- | --- | --- |
| Survival | 0.28 (0.267 - 0.294) | 0.317 (0.303 - 0.332) | 0.01 |  |
| Death | 0.439 (0.384 - 0.493) | 0.614 (0.552 - 0.676) | <0.0001 |  |

Notes: Values are presented as mean (95% CI) and median (interquartile range).P-values are unadjusted for multiple comparisons.

**sTable 4.** **Baseline characteristics and outcomes of non-severe liver disease**

|  | **Overall**  **N = 6,844** | **Survival**  **N = 6,088** | **Death**  **N = 756** | ***P*** |
| --- | --- | --- | --- | --- |
| Dataset, n (%) |  |  |  | <0.0001 |
| HIS | 3264 (47.69) | 3065 (50.34) | 199 (26.32) |  |
| MIMIC | 3580 (52.31) | 3023 (49.66) | 557 (73.68) |  |
| Population categories, n (%) |  |  |  | <0.0001 |
| Cardiac Surgery | 1684 (24.61) | 1674 (27.50) | 10 (1.32) |  |
| Non-Cardiac Surgery | 1384 (20.22) | 1251 (20.55) | 133 (17.59) |  |
| No Surgery | 3776 (55.17) | 3163 (51.95) | 613 (81.08) |  |
| Baseline Characteristics |  |  |  |  |
| Gender, Male (%) | 4184 (61.13) | 3736 (61.37) | 448 (59.26) | 0.2794 |
| Age, years | 65.000 [53.330, 74.429] | 64.000 [52.843, 74.000] | 70.900 [60.578, 78.775] | <0.0001 |
| Height, cm | 168.000 [160.000, 174.790] | 168.000 [160.000, 174.665] | 168.000 [160.000, 175.000] | 0.3582 |
| Weight, kg | 70.000 [59.000, 85.000] | 70.000 [59.000, 85.000] | 73.900 [59.875, 89.856] | 0.0029 |
| BMI, kg/m2 | 25.100 [21.784, 29.237] | 25.000 [21.786, 29.013] | 25.797 [21.715, 31.034] | 0.0091 |
| Median Sofa score | 6.848 (3.577) | 6.610 (3.481) | 8.771 (3.759) | <0.0001 |
| Comorbidities† |  |  |  |  |
| Median CCI score | 4.182 (2.921) | 3.986 (2.836) | 5.769 (3.108) | <0.0001 |
| Severe liver disease (%) | 6844 (100.00) | 6088 (100.00) | 756 (100.00) | NA |
| Chronic pulmonary disease (%) | 1059 (15.47) | 876 (14.39) | 183 (24.21) | <0.0001 |
| Congestive heart failure (%) | 2814 (41.12) | 2481 (40.75) | 333 (44.05) | 0.0896 |
| Diabetes (%) | 1898 (27.73) | 1632 (26.81) | 266 (35.19) | <0.0001 |
| Renal disease (%) | 1299 (18.98) | 1081 (17.76) | 218 (28.84) | <0.0001 |
| Cancer (%) | 1430 (20.89) | 1215 (19.96) | 215 (28.44) | <0.0001 |
| Outcome |  |  |  |  |
| First HTR | 0.093 [0.059, 0.162] | 0.092 [0.059, 0.156] | 0.101 [0.052, 0.218] | 0.0208 |
| First Total Bilirubin, mg/dL | 0.982 [0.600, 1.632] | 0.982 [0.600, 1.600] | 1.000 [0.526, 1.900] | 0.3075 |
| First Hemoglobin, g/dL | 10.400 [8.700, 12.000] | 10.400 [8.800, 12.000] | 9.800 [8.175, 11.800] | <0.0001 |
| Within 7d last HTR | 0.092 [0.058, 0.177] | 0.089 [0.058, 0.157] | 0.165 [0.070, 0.421] | <0.0001 |
| Within 7d last Total Bilirubin, mg/dL | 0.900 [0.591, 1.600] | 0.877 [0.585, 1.500] | 1.405 [0.632, 3.455] | <0.0001 |
| Within 7d last Hemoglobin, g/dL | 9.400 [8.200, 10.900] | 9.400 [8.300, 10.900] | 8.800 [7.800, 10.300] | <0.0001 |

BMI = Body Mass Index; CCI = Charlson Comorbidity Index; SOFA= Sequential Organ Failure Assessment; HTR = Hemoglobin Turnover Rate.

Notes: Data are presented as median [interquartile range, IQR] or frequency (%). P < 0.05 indicates statistical significance (Kruskal-Wallis test for continuous variables; χ² test for categorical variables).

† Defined using International Classification of Diseases, 10th revision codes

**sTable 5.** **Baseline characteristics and outcomes after PSM**

|  | **Survival**  **N = 7,235** | **Death**  **N = 948** | ***P*** | **SMD** |
| --- | --- | --- | --- | --- |
| Dataset, n (%) |  |  | 1 | <0.0001 |
| HIS | 207 (20.91) | 207 (20.91) |  |  |
| MIMIC | 783 (79.09) | 783 (79.09) |  |  |
| Population categories, n (%) |  |  | 0.5633 | 0.0482 |
| Cardiac Surgery | 11 (1.11) | 11 (1.11) |  |  |
| Non-Cardiac Surgery | 162 (16.36) | 180 (18.18) |  |  |
| No Surgery | 817 (82.53) | 799 (80.71) |  |  |
| Baseline Characteristics |  |  |  |  |
| Gender, Male (%) | 591 (59.70) | 579 (58.48) | 0.6151 | 0.0247 |
| Age, years | 66.958 (14.074) | 66.840 (14.189) | 0.8536 | 0.0083 |
| Height, cm | 167.894 (9.511) | 168.006 (9.451) | 0.7925 | 0.0118 |
| Weight, kg | 79.309 (26.196) | 78.679 (24.248) | 0.5784 | 0.025 |
| BMI, kg/m2 | 27.990 (8.715) | 27.701 (7.781) | 0.4355 | 0.0351 |
| Median Sofa score | 9.261 (3.915) | 9.316 (4.026) | 0.7556 | 0.014 |
| Comorbidities† |  |  |  |  |
| Median CCI score | 5.957 (2.915) | 6.002 (3.099) | 0.7368 | 0.0151 |
| Severe liver disease (%) | 175 (17.68) | 186 (18.79) | 0.5605 | 0.0288 |
| Chronic pulmonary disease (%) | 227 (22.93) | 222 (22.42) | 0.83 | 0.0121 |
| Congestive heart failure (%) | 410 (41.41) | 397 (40.10) | 0.5831 | 0.0267 |
| Diabetes (%) | 348 (35.15) | 343 (34.65) | 0.8504 | 0.0106 |
| Renal disease (%) | 270 (27.27) | 282 (28.48) | 0.5814 | 0.027 |
| Cancer (%) | 260 (26.26) | 263 (26.57) | 0.9188 | 0.0069 |

**sTable 6.** **Effect of HTR on 7-Day Mortality Across Quartiles (at Admission).**

|  | **Quartiles of Hemoglobin Turnover Rate** | | | | ***P* For Trend** | **Per SD Increase** |
| --- | --- | --- | --- | --- | --- | --- |
| **Q1** | **Q2** | **Q3** | **Q4** |
| Chronic pulmonary disease | ≥0.01 & <0.05 | ≥0.05 & <0.10 | ≥0.10 & <0.23 | ≥0.23 & ≤5.94 |  |  |
| Person | 320 | 319 | 319 | 320 |  |  |
| Case | 52 | 51 | 44 | 64 |  |  |
| Model1 | 1(refrence) | 0.9808(0.6426-1.4964) | 0.8246(0.532-1.2733) | 1.2885(0.8612-1.9351) | 0.3290 | 1.0837(0.9422-1.2287) |
| Model2 | 1(refrence) | 0.9147(0.5932-1.4094) | 0.7029(0.448-1.0978) | 0.9748(0.6203-1.5328) | 0.6234 | 1.0207(0.8672-1.1802) |
| Model3 | 1(refrence) | 1.0246(0.6605-1.5887) | 0.8507(0.5374-1.3411) | 1.3014(0.8065-2.0975) | 0.4906 | 1.1082(0.9363-1.2939) |
| Congestive heart failure | ≥0.01 & <0.06 | ≥0.06 & <0.10 | ≥0.10 & <0.18 | ≥0.18 & ≤5.08 |  |  |
| Person | 762 | 762 | 761 | 762 |  |  |
| Case | 82 | 72 | 96 | 125 |  |  |
| Model1 | 1(refrence) | 0.8653(0.6188-1.2077) | 1.1971(0.8755-1.6403) | 1.6273(1.2094-2.1999) | 0.0002 | 1.178(1.0851-1.2762) |
| Model2 | 1(refrence) | 1.2639(0.889-1.7943) | 1.585(1.1342-2.2192) | 1.6077(1.1544-2.2459) | 0.0026 | 1.0842(0.9821-1.1918) |
| Model3 | 1(refrence) | 1.279(0.8984-1.8182) | 1.6018(1.145-2.2452) | 1.6336(1.1712-2.2857) | 0.0020 | 1.0776(0.9764-1.1846) |
| Renal disease | ≥0.01 & <0.06 | ≥0.06 & <0.11 | ≥0.11 & <0.23 | ≥0.23 & ≤6.63 |  |  |
| Person | 399 | 398 | 398 | 399 |  |  |
| Case | 51 | 66 | 67 | 73 |  |  |
| Model1 | 1(refrence) | 1.3565(0.9152-2.0205) | 1.3812(0.933-2.0553) | 1.528(1.0389-2.262) | 0.0417 | 1.0867(0.9596-1.2157) |
| Model2 | 1(refrence) | 1.2294(0.8188-1.8541) | 1.2618(0.8419-1.8999) | 1.3746(0.908-2.0914) | 0.1460 | 1.116(0.9687-1.2695) |
| Model3 | 1(refrence) | 1.3219(0.8759-2.0042) | 1.403(0.9272-2.133) | 1.6513(1.0585-2.5849) | 0.0298 | 1.1591(0.9981-1.3318) |
| Non-severe liver disease | ≥0.01 & <0.06 | ≥0.06 & <0.09 | ≥0.09 & <0.16 | ≥0.16 & ≤5.86 |  |  |
| Person | 1712 | 1710 | 1711 | 1711 |  |  |
| Case | 212 | 145 | 147 | 252 |  |  |
| Model1 | 1(refrence) | 0.6556(0.5239-0.8183) | 0.665(0.5319-0.8294) | 1.2221(1.0045-1.488) | 0.0352 | 1.1724(1.1085-1.2399) |
| Model2 | 1(refrence) | 0.9373(0.7414-1.1823) | 0.9079(0.717-1.1471) | 1.1122(0.8982-1.3776) | 0.3811 | 1.059(0.9972-1.1219) |
| Model3 | 1(refrence) | 0.9417(0.7447-1.1881) | 0.9162(0.7234-1.1579) | 1.1212(0.9051-1.3893) | 0.3404 | 1.0554(0.9936-1.1182) |
| cancer | ≥0.01 & <0.07 | ≥0.07 & <0.12 | ≥0.12 & <0.26 | ≥0.26 & ≤5.19 |  |  |
| Person | 420 | 421 | 417 | 419 |  |  |
| Case | 55 | 54 | 63 | 85 |  |  |
| Model1 | 1(refrence) | 0.9765(0.6522-1.4614) | 1.181(0.7999-1.7482) | 1.6889(1.1696-2.4558) | 0.0025 | 1.1791(1.0543-1.312) |
| Model2 | 1(refrence) | 1.0148(0.6712-1.5342) | 1.0863(0.7226-1.6363) | 1.1895(0.7923-1.7933) | 0.3696 | 1.0416(0.9165-1.1724) |
| Model3 | 1(refrence) | 1.1177(0.7338-1.7022) | 1.1658(0.7684-1.7721) | 1.2448(0.8104-1.9176) | 0.3194 | 1.049(0.9175-1.1879) |
| age<60 | ≥0.01 & <0.07 | ≥0.07 & <0.12 | ≥0.12 & <0.30 | ≥0.30 & ≤6.63 |  |  |
| Person | 872 | 872 | 872 | 872 |  |  |
| Case | 71 | 31 | 49 | 129 |  |  |
| Model1 | 1(refrence) | 0.4159(0.2663-0.635) | 0.6717(0.4587-0.9762) | 1.9587(1.4465-2.6718) | <0.0001 | 1.3744(1.2629-1.4918) |
| Model2 | 1(refrence) | 0.7721(0.4846-1.2056) | 0.7391(0.4927-1.1005) | 1.3533(0.9023-2.0283) | 0.2731 | 1.1898(1.0649-1.3248) |
| Model3 | 1(refrence) | 0.7701(0.4828-1.204) | 0.7209(0.4799-1.0749) | 1.3276(0.8834-1.9937) | 0.3320 | 1.1973(1.0698-1.3354) |
| age>60 | ≥0.01 & <0.06 | ≥0.06 & <0.10 | ≥0.10 & <0.20 | ≥0.20 & ≤5.86 |  |  |
| Person | 1174 | 1174 | 1173 | 1174 |  |  |
| Case | 164 | 134 | 155 | 215 |  |  |
| Model1 | 1(refrence) | 0.7935(0.621-1.0123) | 0.9377(0.7402-1.1875) | 1.3807(1.107-1.7248) | 0.0012 | 1.2316(1.1555-1.3127) |
| Model2 | 1(refrence) | 0.9909(0.7683-1.2764) | 1.0359(0.8078-1.3279) | 1.0205(0.7994-1.3035) | 0.8057 | 1.0865(1.0125-1.1639) |
| Model3 | 1(refrence) | 1.006(0.7795-1.2966) | 1.0828(0.8431-1.3901) | 1.1773(0.9128-1.5186) | 0.1847 | 1.1344(1.0542-1.22) |
| gender0 | ≥0.01 & <0.06 | ≥0.06 & <0.11 | ≥0.11 & <0.24 | ≥0.24 & ≤6.63 |  |  |
| Person | 787 | 787 | 787 | 787 |  |  |
| Case | 91 | 72 | 87 | 138 |  |  |
| Model1 | 1(refrence) | 0.7702(0.5545-1.0661) | 0.9506(0.6953-1.2989) | 1.6263(1.2246-2.1688) | 0.0002 | 1.2554(1.1568-1.3596) |
| Model2 | 1(refrence) | 1.112(0.7886-1.5635) | 1.1669(0.839-1.622) | 1.3723(0.9679-1.9457) | 0.0818 | 1.1592(1.0435-1.2844) |
| Model3 | 1(refrence) | 1.1127(0.7889-1.5646) | 1.1697(0.8405-1.6267) | 1.3712(0.9668-1.9448) | 0.0820 | 1.1589(1.0431-1.2843) |
| gender1 | ≥0.01 & <0.06 | ≥0.06 & <0.11 | ≥0.11 & <0.24 | ≥0.24 & ≤6.63 |  |  |
| Person | 787 | 787 | 787 | 787 |  |  |
| Case | 91 | 72 | 87 | 138 |  |  |
| Model1 | 1(refrence) | 0.7702(0.5545-1.0661) | 0.9506(0.6953-1.2989) | 1.6263(1.2246-2.1688) | 0.0002 | 1.2554(1.1568-1.3596) |
| Model2 | 1(refrence) | 1.112(0.7886-1.5635) | 1.1669(0.839-1.622) | 1.3723(0.9679-1.9457) | 0.0818 | 1.1592(1.0435-1.2844) |
| Model3 | 1(refrence) | 1.1127(0.7889-1.5646) | 1.1697(0.8405-1.6267) | 1.3712(0.9668-1.9448) | 0.0820 | 1.1589(1.0431-1.2843) |
| NS | ≥0.01 & <0.06 | ≥0.06 & <0.11 | ≥0.11 & <0.28 | ≥0.28 & ≤6.63 |  |  |
| Person | 1173 | 1169 | 1170 | 1171 |  |  |
| Case | 181 | 158 | 192 | 225 |  |  |
| Model1 | 1(refrence) | 0.8565(0.6797-1.0784) | 1.076(0.8623-1.3431) | 1.3035(1.0518-1.6174) | 0.0031 | 1.1532(1.0785-1.2303) |
| Model2 | 1(refrence) | 0.7749(0.6123-0.9797) | 0.8971(0.7139-1.1272) | 1.0207(0.8062-1.2929) | 0.6474 | 1.1111(1.0307-1.1947) |
| Model3 | 1(refrence) | 0.775(0.6113-0.9816) | 0.9276(0.7347-1.1711) | 1.136(0.876-1.4725) | 0.2876 | 1.1618(1.0701-1.2589) |
| NC | ≥0.01 & <0.07 | ≥0.07 & <0.12 | ≥0.12 & <0.30 | ≥0.30 & ≤5.87 |  |  |
| Person | 453 | 452 | 452 | 453 |  |  |
| Case | 35 | 46 | 37 | 64 |  |  |
| Model1 | 1(refrence) | 1.3531(0.856-2.1562) | 1.0648(0.6572-1.7284) | 1.9649(1.2803-3.0613) | 0.0067 | 1.2575(1.1165-1.4067) |
| Model2 | 1(refrence) | 1.4556(0.9062-2.3565) | 0.9534(0.5783-1.574) | 1.311(0.804-2.1584) | 0.6003 | 1.1678(1.0097-1.3391) |
| Model3 | 1(refrence) | 1.5621(0.968-2.542) | 1.0719(0.644-1.7868) | 1.6512(0.9631-2.844) | 0.2039 | 1.2355(1.0595-1.4304) |
| PSM | ≥0.01 & <0.06 | ≥0.06 & <0.13 | ≥0.13 & <0.33 | ≥0.33 & ≤6.63 |  |  |
| Person | 441 | 433 | 437 | 437 |  |  |
| Case | 221 | 215 | 210 | 237 |  |  |
| Model1 | 1(refrence) | 0.9818(0.753-1.28) | 0.9209(0.7066-1.2) | 1.1796(0.9051-1.5382) | 0.3152 | 1.138(1.0335-1.258) |
| Model2 | 1(refrence) | 0.9818(0.753-1.28) | 0.9209(0.7066-1.2) | 1.1796(0.9051-1.5382) | 0.3152 | 1.138(1.0335-1.258) |
| Model3 | 1(refrence) | 0.9941(0.7556-1.3078) | 0.9568(0.7242-1.2639) | 1.2972(0.9359-1.8008) | 0.2528 | 1.2027(1.0684-1.3611) |
| diabetes | ≥0.01 & <0.06 | ≥0.06 & <0.10 | ≥0.10 & <0.20 | ≥0.20 & ≤6.63 |  |  |
| Person | 570 | 569 | 569 | 569 |  |  |
| Case | 78 | 67 | 77 | 107 |  |  |
| Model1 | 1(refrence) | 0.8419(0.5926-1.1932) | 0.9872(0.7031-1.3858) | 1.4609(1.0643-2.0129) | 0.0096 | 1.1787(1.073-1.2903) |
| Model2 | 1(refrence) | 0.9326(0.6476-1.3401) | 0.963(0.6746-1.3738) | 1.112(0.7804-1.5869) | 0.5524 | 1.0792(0.9687-1.1951) |
| Model3 | 1(refrence) | 0.9612(0.6659-1.3845) | 1.0127(0.7069-1.4504) | 1.294(0.889-1.8841) | 0.1992 | 1.1227(1.0031-1.2516) |
| Severe liver disease | ≥0.02 & <0.22 | ≥0.22 & <0.52 | ≥0.52 & <1.25 | ≥1.25 & ≤6.63 |  |  |
| Person | 335 | 335 | 334 | 335 |  |  |
| Case | 31 | 38 | 54 | 69 |  |  |
| Model1 | 1(refrence) | 1.2547(0.7617-2.081) | 1.8912(1.1888-3.0562) | 2.5438(1.6284-4.0539) | <0.0001 | 1.3876(1.2169-1.5779) |
| Model2 | 1(refrence) | 1.2585(0.7513-2.1221) | 1.9223(1.1535-3.2497) | 2.6366(1.5655-4.5197) | <0.0001 | 1.4019(1.2069-1.6248) |
| Model3 | 1(refrence) | 1.234(0.7321-2.0942) | 1.848(1.0954-3.1634) | 2.5505(1.4964-4.4258) | <0.0001 | 1.4028(1.2021-1.633) |
| BMI 18.5-24.9 | ≥0.01 & <0.07 | ≥0.07 & <0.11 | ≥0.11 & <0.19 | ≥0.19 & ≤5.93 |  |  |
| Person | 815 | 815 | 814 | 815 |  |  |
| Case | 86 | 51 | 75 | 101 |  |  |
| Model1 | 1(refrence) | 0.5659(0.3922-0.8086) | 0.8603(0.6199-1.1915) | 1.1991(0.8839-1.6299) | 0.0666 | 1.1249(1.0219-1.2264) |
| Model2 | 1(refrence) | 0.8873(0.6039-1.2928) | 1.1495(0.8095-1.6292) | 0.9294(0.6485-1.3297) | 0.9997 | 0.9793(0.8648-1.0939) |
| Model3 | 1(refrence) | 0.8865(0.6026-1.2932) | 1.1504(0.8076-1.6358) | 0.9244(0.644-1.3249) | 0.9755 | 0.9833(0.8675-1.0994) |
| BMI ≥24.9 | ≥0.01 & <0.06 | ≥0.06 & <0.11 | ≥0.11 & <0.27 | ≥0.27 & ≤6.63 |  |  |
| Person | 1117 | 1112 | 1115 | 1114 |  |  |
| Case | 138 | 96 | 123 | 203 |  |  |
| Model1 | 1(refrence) | 0.6703(0.5081-0.8811) | 0.8796(0.6787-1.1389) | 1.5808(1.252-2.0011) | <0.0001 | 1.2811(1.1966-1.3698) |
| Model2 | 1(refrence) | 0.8627(0.647-1.1464) | 0.8311(0.6322-1.0913) | 1.0399(0.7929-1.3653) | 0.8657 | 1.1521(1.0627-1.2465) |
| Model3 | 1(refrence) | 0.8738(0.6547-1.1622) | 0.9278(0.7034-1.2223) | 1.3251(0.9887-1.7755) | 0.0982 | 1.2398(1.1365-1.3514) |
| MIMIC | ≥0.01 & <0.06 | ≥0.06 & <0.12 | ≥0.12 & <0.35 | ≥0.35 & ≤6.63 |  |  |
| Person | 1204 | 1207 | 1199 | 1203 |  |  |
| Case | 172 | 171 | 172 | 220 |  |  |
| Model1 | 1(refrence) | 0.9903(0.7879-1.2448) | 1.0049(0.7996-1.2628) | 1.3428(1.0806-1.6709) | 0.0086 | 1.1615(1.0852-1.2403) |
| Model2 | 1(refrence) | 0.8687(0.6875-1.0973) | 0.8283(0.6535-1.0495) | 1.0657(0.8323-1.3654) | 0.7824 | 1.1412(1.0551-1.2314) |
| Model3 | 1(refrence) | 0.8933(0.7063-1.1295) | 0.9206(0.7223-1.1728) | 1.3251(1.0107-1.7367) | 0.0890 | 1.2187(1.1212-1.3225) |
| HIS | ≥0.01 & <0.07 | ≥0.07 & <0.10 | ≥0.10 & <0.15 | ≥0.15 & ≤5.19 |  |  |
| Person | 843 | 842 | 842 | 843 |  |  |
| Case | 53 | 33 | 44 | 83 |  |  |
| Model1 | 1(refrence) | 0.608(0.3861-0.9442) | 0.8219(0.5426-1.2391) | 1.6279(1.1409-2.3416) | 0.0015 | 1.2572(1.1566-1.3693) |
| Model2 | 1(refrence) | 0.9414(0.5795-1.5104) | 0.9662(0.6157-1.5091) | 1.0329(0.6692-1.5979) | 0.8710 | 1.0095(0.9138-1.1054) |
| Model3 | 1(refrence) | 0.9568(0.5883-1.5376) | 0.9919(0.6304-1.5538) | 1.0743(0.6935-1.6683) | 0.7350 | 1.0123(0.9153-1.1093) |

**sTable 7.** **Effect of HTR on 7-Day Mortality Across Quartiles (Last Within 7d).**

|  | **Quartiles of Hemoglobin Turnover Rate** | | | | ***P* For Trend** | **Per SD Increase** |
| --- | --- | --- | --- | --- | --- | --- |
| **Q1** | **Q2** | **Q3** | **Q4** |
| Chronic pulmonary disease | ≥0.01 & <0.05 | ≥0.05 & <0.11 | ≥0.11 & <0.32 | ≥0.32 & ≤5.84 |  |  |
| Person | 323 | 316 | 319 | 320 |  |  |
| Case | 68 | 66 | 73 | 121 |  |  |
| Model1 | 1(refrence) | 0.99(0.6758-1.4496) | 1.1128(0.7657-1.619) | 2.2802(1.6111-3.2477) | <0.0001 | 1.4021(1.244-1.5909) |
| Model2 | 1(refrence) | 0.9569(0.6462-1.4163) | 1.0131(0.6877-1.4931) | 2.1388(1.4424-3.1893) | <0.0001 | 1.4271(1.2456-1.6477) |
| Model3 | 1(refrence) | 1.0742(0.7202-1.6016) | 1.1174(0.7527-1.6597) | 2.6478(1.74-4.0535) | <0.0001 | 1.5351(1.3209-1.8022) |
| Congestive heart failure | ≥0.01 & <0.06 | ≥0.06 & <0.10 | ≥0.10 & <0.21 | ≥0.21 & ≤10.91 |  |  |
| Person | 762 | 762 | 761 | 762 |  |  |
| Case | 103 | 88 | 133 | 302 |  |  |
| Model1 | 1(refrence) | 0.8354(0.6155-1.1316) | 1.355(1.0255-1.7946) | 4.2005(3.2704-5.4306) | <0.0001 | 1.6431(1.487-1.824) |
| Model2 | 1(refrence) | 1.1106(0.8023-1.5354) | 1.4581(1.08-1.9728) | 3.5121(2.6417-4.6957) | <0.0001 | 1.4257(1.2797-1.5981) |
| Model3 | 1(refrence) | 1.114(0.8038-1.5418) | 1.4655(1.0841-1.9853) | 3.578(2.6863-4.7924) | <0.0001 | 1.4286(1.2806-1.6036) |
| Renal disease | ≥0.01 & <0.06 | ≥0.06 & <0.12 | ≥0.12 & <0.31 | ≥0.31 & ≤10.91 |  |  |
| Person | 399 | 399 | 397 | 399 |  |  |
| Case | 76 | 81 | 117 | 154 |  |  |
| Model1 | 1(refrence) | 1.0825(0.7634-1.5364) | 1.7759(1.2791-2.4772) | 2.6714(1.9437-3.6961) | <0.0001 | 1.2449(1.121-1.3868) |
| Model2 | 1(refrence) | 0.9975(0.6956-1.4311) | 1.6846(1.1978-2.3796) | 2.8663(2.0239-4.0865) | <0.0001 | 1.3236(1.172-1.5) |
| Model3 | 1(refrence) | 1.055(0.7309-1.5234) | 1.86(1.3072-2.6579) | 3.3632(2.318-4.9123) | <0.0001 | 1.3649(1.1962-1.5628) |
| Non-severe liver disease | ≥0.01 & <0.06 | ≥0.06 & <0.09 | ≥0.09 & <0.18 | ≥0.18 & ≤10.91 |  |  |
| Person | 1716 | 1706 | 1711 | 1711 |  |  |
| Case | 234 | 160 | 237 | 557 |  |  |
| Model1 | 1(refrence) | 0.6555(0.5289-0.8105) | 1.0183(0.8383-1.2371) | 3.0569(2.5797-3.6318) | <0.0001 | 1.5763(1.4819-1.6793) |
| Model2 | 1(refrence) | 0.8534(0.6797-1.0693) | 1.1016(0.8938-1.3578) | 2.2668(1.8744-2.7468) | <0.0001 | 1.3341(1.2502-1.426) |
| Model3 | 1(refrence) | 0.8544(0.6805-1.0708) | 1.1084(0.8991-1.3666) | 2.2801(1.8845-2.7644) | <0.0001 | 1.3341(1.2503-1.4261) |
| Cancer | ≥0.01 & <0.07 | ≥0.07 & <0.13 | ≥0.13 & <0.33 | ≥0.33 & ≤7.64 |  |  |
| Person | 420 | 419 | 420 | 418 |  |  |
| Case | 75 | 52 | 111 | 176 |  |  |
| Model1 | 1(refrence) | 0.6518(0.4426-0.9536) | 1.6524(1.1893-2.3062) | 3.3455(2.4468-4.6091) | <0.0001 | 1.6408(1.4652-1.8476) |
| Model2 | 1(refrence) | 0.6931(0.4659-1.025) | 1.5059(1.0638-2.1399) | 2.6931(1.9004-3.8397) | <0.0001 | 1.4608(1.2942-1.6587) |
| Model3 | 1(refrence) | 0.7803(0.5198-1.1651) | 1.5919(1.1122-2.2877) | 2.8844(1.9951-4.1963) | <0.0001 | 1.4914(1.3082-1.7108) |
| Age <60 | ≥0.01 & <0.06 | ≥0.06 & <0.11 | ≥0.11 & <0.37 | ≥0.37 & ≤5.85 |  |  |
| Person | 872 | 872 | 872 | 872 |  |  |
| Case | 67 | 41 | 103 | 249 |  |  |
| Model1 | 1(refrence) | 0.5928(0.3944-0.8808) | 1.6093(1.1679-2.2311) | 4.8021(3.6163-6.4553) | <0.0001 | 1.7749(1.6431-1.9203) |
| Model2 | 1(refrence) | 0.7093(0.4634-1.0742) | 1.0593(0.7492-1.5044) | 2.2702(1.5856-3.2721) | <0.0001 | 1.5048(1.3638-1.6635) |
| Model3 | 1(refrence) | 0.6819(0.4448-1.0344) | 1.0293(0.7269-1.4636) | 2.176(1.5161-3.1433) | <0.0001 | 1.5175(1.3737-1.6793) |
| Age >60 | ≥0.01 & <0.06 | ≥0.06 & <0.11 | ≥0.11 & <0.23 | ≥0.23 & ≤10.91 |  |  |
| Person | 1175 | 1174 | 1173 | 1173 |  |  |
| Case | 126 | 94 | 146 | 302 |  |  |
| Model1 | 1(refrence) | 0.7246(0.5464-0.9579) | 1.1836(0.919-1.5262) | 2.8866(2.3071-3.63) | <0.0001 | 1.4155(1.322-1.517) |
| Model2 | 1(refrence) | 0.9074(0.6784-1.2104) | 1.2094(0.9286-1.5767) | 2.1768(1.701-2.7967) | <0.0001 | 1.2243(1.1392-1.3179) |
| Model3 | 1(refrence) | 0.9303(0.6948-1.2422) | 1.286(0.9859-1.6794) | 2.6067(2.0223-3.3726) | <0.0001 | 1.2958(1.1989-1.403) |
| Gender0 | ≥0.01 & <0.06 | ≥0.06 & <0.10 | ≥0.10 & <0.28 | ≥0.28 & ≤10.91 |  |  |
| Person | 787 | 790 | 784 | 787 |  |  |
| Case | 111 | 68 | 155 | 283 |  |  |
| Model1 | 1(refrence) | 0.5736(0.4151-0.7873) | 1.5007(1.1506-1.9628) | 3.4196(2.6757-4.3952) | <0.0001 | 1.5554(1.4328-1.6926) |
| Model2 | 1(refrence) | 0.6946(0.4936-0.9716) | 1.4476(1.0865-1.9331) | 3.0233(2.2407-4.0961) | <0.0001 | 1.4734(1.3269-1.6416) |
| Model3 | 1(refrence) | 0.6945(0.4935-0.9716) | 1.4474(1.0857-1.9338) | 3.0229(2.24-4.0964) | <0.0001 | 1.4744(1.3277-1.6429) |
| Gender1 | ≥0.01 & <0.06 | ≥0.06 & <0.10 | ≥0.10 & <0.28 | ≥0.28 & ≤10.91 |  |  |
| Person | 787 | 790 | 784 | 787 |  |  |
| Case | 111 | 68 | 155 | 283 |  |  |
| Model1 | 1(refrence) | 0.5736(0.4151-0.7873) | 1.5007(1.1506-1.9628) | 3.4196(2.6757-4.3952) | <0.0001 | 1.5554(1.4328-1.6926) |
| Model2 | 1(refrence) | 0.6946(0.4936-0.9716) | 1.4476(1.0865-1.9331) | 3.0233(2.2407-4.0961) | <0.0001 | 1.4734(1.3269-1.6416) |
| Model3 | 1(refrence) | 0.6945(0.4935-0.9716) | 1.4474(1.0857-1.9338) | 3.0229(2.24-4.0964) | <0.0001 | 1.4744(1.3277-1.6429) |
| NS | ≥0.01 & <0.06 | ≥0.06 & <0.13 | ≥0.13 & <0.37 | ≥0.37 & ≤10.91 |  |  |
| Person | 1171 | 1171 | 1170 | 1171 |  |  |
| Case | 224 | 205 | 315 | 450 |  |  |
| Model1 | 1(refrence) | 0.8972(0.7273-1.1062) | 1.5576(1.2828-1.8937) | 2.6386(2.1903-3.1858) | <0.0001 | 1.4202(1.3346-1.5129) |
| Model2 | 1(refrence) | 0.8307(0.6706-1.0285) | 1.3723(1.1221-1.6802) | 2.4085(1.9584-2.9677) | <0.0001 | 1.4128(1.3168-1.5178) |
| Model3 | 1(refrence) | 0.8166(0.6576-1.0135) | 1.4054(1.1437-1.7286) | 2.7392(2.1903-3.4316) | <0.0001 | 1.5054(1.3906-1.6322) |
| NC | ≥0.01 & <0.07 | ≥0.07 & <0.13 | ≥0.13 & <0.38 | ≥0.38 & ≤6.40 |  |  |
| Person | 453 | 452 | 452 | 453 |  |  |
| Case | 44 | 43 | 76 | 147 |  |  |
| Model1 | 1(refrence) | 0.9773(0.6271-1.5221) | 1.8789(1.2692-2.8118) | 4.4655(3.1154-6.5126) | <0.0001 | 1.6327(1.467-1.825) |
| Model2 | 1(refrence) | 0.9917(0.6258-1.5712) | 1.6365(1.0805-2.5023) | 3.5844(2.3535-5.5333) | <0.0001 | 1.5746(1.3868-1.7955) |
| Model3 | 1(refrence) | 1.065(0.6692-1.6946) | 1.9121(1.252-2.9482) | 4.7497(3.043-7.5111) | <0.0001 | 1.6985(1.4812-1.959) |
| PSM | ≥0.01 & <0.08 | ≥0.08 & <0.18 | ≥0.18 & <0.54 | ≥0.54 & ≤10.91 |  |  |
| Person | 441 | 434 | 436 | 437 |  |  |
| Case | 214 | 213 | 266 | 310 |  |  |
| Model1 | 1(refrence) | 1.0223(0.7842-1.3329) | 1.6598(1.2702-2.1722) | 2.5892(1.9631-3.4268) | <0.0001 | 1.42(1.2632-1.6089) |
| Model2 | 1(refrence) | 1.0223(0.7842-1.3329) | 1.6598(1.2702-2.1722) | 2.5892(1.9631-3.4268) | <0.0001 | 1.42(1.2632-1.6089) |
| Model3 | 1(refrence) | 1.0713(0.8161-1.4067) | 1.8695(1.408-2.4877) | 3.5488(2.5247-5.0202) | <0.0001 | 1.5667(1.3542-1.8284) |
| Diabetes | ≥0.01 & <0.06 | ≥0.06 & <0.11 | ≥0.11 & <0.24 | ≥0.24 & ≤5.49 |  |  |
| Person | 570 | 570 | 568 | 569 |  |  |
| Case | 93 | 79 | 122 | 222 |  |  |
| Model1 | 1(refrence) | 0.8252(0.5952-1.1418) | 1.403(1.0414-1.8953) | 3.2814(2.4903-4.3512) | <0.0001 | 1.4504(1.3242-1.595) |
| Model2 | 1(refrence) | 0.873(0.6208-1.2253) | 1.3743(1.004-1.8858) | 2.8948(2.1161-3.9814) | <0.0001 | 1.3443(1.2138-1.4948) |
| Model3 | 1(refrence) | 0.9027(0.6406-1.2698) | 1.4366(1.046-1.9777) | 3.4529(2.4896-4.8147) | <0.0001 | 1.4393(1.2882-1.616) |
| Severe liver disease | ≥0.02 & <0.23 | ≥0.23 & <0.61 | ≥0.61 & <1.50 | ≥1.50 & ≤5.85 |  |  |
| Person | 335 | 336 | 333 | 335 |  |  |
| Case | 33 | 63 | 84 | 152 |  |  |
| Model1 | 1(refrence) | 2.1119(1.3532-3.3498) | 3.0873(2.0138-4.8303) | 7.6013(5.0584-11.7141) | <0.0001 | 1.8756(1.6635-2.121) |
| Model2 | 1(refrence) | 2.2501(1.4203-3.6217) | 3.5387(2.2376-5.7068) | 9.5892(5.988-15.7267) | <0.0001 | 1.9927(1.7316-2.3026) |
| Model3 | 1(refrence) | 2.2451(1.4049-3.6458) | 3.5262(2.2059-5.7493) | 9.5563(5.8847-15.9007) | <0.0001 | 1.9986(1.732-2.3158) |
| BMI18.5-24.9 | ≥0.01 & <0.06 | ≥0.06 & <0.10 | ≥0.10 & <0.21 | ≥0.21 & ≤10.91 |  |  |
| Person | 815 | 815 | 814 | 815 |  |  |
| Case | 81 | 73 | 117 | 259 |  |  |
| Model1 | 1(refrence) | 0.8915(0.6386-1.2427) | 1.5211(1.127-2.062) | 4.2212(3.2274-5.5722) | <0.0001 | 1.515(1.3901-1.6557) |
| Model2 | 1(refrence) | 1.1021(0.7698-1.576) | 1.3033(0.9405-1.8121) | 2.7346(1.9929-3.7767) | <0.0001 | 1.3143(1.19-1.4566) |
| Model3 | 1(refrence) | 1.092(0.7618-1.5634) | 1.2835(0.9243-1.7881) | 2.688(1.9542-3.7209) | <0.0001 | 1.3197(1.1938-1.4632) |
| BMI≥24.9 | ≥0.01 & <0.06 | ≥0.06 & <0.12 | ≥0.12 & <0.36 | ≥0.36 & ≤6.40 |  |  |
| Person | 1115 | 1114 | 1114 | 1115 |  |  |
| Case | 156 | 108 | 203 | 392 |  |  |
| Model1 | 1(refrence) | 0.66(0.5075-0.8554) | 1.3698(1.0918-1.7215) | 3.333(2.7091-4.1171) | <0.0001 | 1.6146(1.5119-1.7267) |
| Model2 | 1(refrence) | 0.7544(0.5734-0.9896) | 1.1569(0.9088-1.4746) | 2.4363(1.9076-3.1212) | <0.0001 | 1.4798(1.37-1.6008) |
| Model3 | 1(refrence) | 0.7717(0.5861-1.013) | 1.2532(0.9823-1.6008) | 2.9643(2.2932-3.8433) | <0.0001 | 1.6054(1.4755-1.7501) |
| MIMIC | ≥0.01 & <0.06 | ≥0.06 & <0.14 | ≥0.14 & <0.45 | ≥0.45 & ≤6.40 |  |  |
| Person | 1206 | 1202 | 1202 | 1203 |  |  |
| Case | 227 | 201 | 291 | 420 |  |  |
| Model1 | 1(refrence) | 0.866(0.7022-1.0674) | 1.3776(1.1333-1.6762) | 2.3134(1.921-2.7915) | <0.0001 | 1.4478(1.3628-1.5393) |
| Model2 | 1(refrence) | 0.7965(0.6423-0.9869) | 1.1964(0.9741-1.4703) | 2.1777(1.7555-2.7061) | <0.0001 | 1.4882(1.3853-1.6006) |
| Model3 | 1(refrence) | 0.8306(0.6692-1.0303) | 1.3211(1.0721-1.629) | 2.6615(2.1169-3.3519) | <0.0001 | 1.6128(1.4917-1.7462) |
| HIS | ≥0.01 & <0.06 | ≥0.06 & <0.09 | ≥0.09 & <0.15 | ≥0.15 & ≤10.91 |  |  |
| Person | 843 | 842 | 842 | 843 |  |  |
| Case | 31 | 37 | 69 | 244 |  |  |
| Model1 | 1(refrence) | 1.2039(0.7405-1.97) | 2.3381(1.5274-3.6578) | 10.6698(7.3492-16.0197) | <0.0001 | 2.0037(1.7831-2.2691) |
| Model2 | 1(refrence) | 1.1853(0.7084-1.9944) | 1.7745(1.1205-2.8621) | 4.4397(2.8786-7.023) | <0.0001 | 1.2781(1.1373-1.4496) |
| Model3 | 1(refrence) | 1.1589(0.6908-1.9545) | 1.8207(1.1478-2.9415) | 4.5929(2.9699-7.2848) | <0.0001 | 1.2879(1.1444-1.4619) |

**sTable 8.** **Effect of HTR on 7-Day Mortality Across Quartiles (Overall).**

|  | **Quartiles of Hemoglobin Turnover Rate** | | | | ***P* For Trend** | **Per SD Increase** |
| --- | --- | --- | --- | --- | --- | --- |
| **Q1** | **Q2** | **Q3** | **Q4** |
| Chronic pulmonary disease | ≥0.00 & <0.06 | ≥0.06 & <0.12 | ≥0.12 & <0.37 | ≥0.37 & ≤6.69 |  |  |
| Person | 3694 | 3702 | 3685 | 3694 |  |  |
| Case | 536 | 569 | 746 | 1150 |  |  |
| Model1 | 1(refrence) | 1.07(0.9416-1.2161) | 1.4955(1.3243-1.6898) | 2.6633(2.3751-2.9897) | <0.0001 | 1.3639(1.317-1.4127) |
| Model2 | 1(refrence) | 1.0062(0.8839-1.1454) | 1.4721(1.2982-1.6701) | 2.8251(2.4829-3.2175) | <0.0001 | 1.3894(1.3353-1.4461) |
| Model3 | 1(refrence) | 1.0942(0.9596-1.2478) | 1.5957(1.4044-1.814) | 3.4372(3.0038-3.9366) | <0.0001 | 1.4775(1.4155-1.5431) |
| Congestive heart failure | ≥0.00 & <0.06 | ≥0.06 & <0.12 | ≥0.12 & <0.37 | ≥0.37 & ≤6.69 |  |  |
| Person | 12875 | 12876 | 12876 | 12873 |  |  |
| Case | 1218 | 1314 | 2435 | 4525 |  |  |
| Model1 | 1(refrence) | 1.0877(1.002-1.1808) | 2.232(2.0739-2.4032) | 5.1877(4.8423-5.5614) | <0.0001 | 1.5839(1.5497-1.6193) |
| Model2 | 1(refrence) | 1.2414(1.1416-1.35) | 2.4742(2.2928-2.6712) | 5.152(4.7809-5.555) | <0.0001 | 1.5197(1.4844-1.5563) |
| Model3 | 1(refrence) | 1.2467(1.1463-1.356) | 2.4867(2.3037-2.6855) | 5.2715(4.8893-5.687) | <0.0001 | 1.5236(1.488-1.5604) |
| Renal disease | ≥0.00 & <0.08 | ≥0.08 & <0.16 | ≥0.16 & <0.40 | ≥0.40 & ≤28.11 |  |  |
| Person | 7638 | 7649 | 7628 | 7634 |  |  |
| Case | 984 | 1307 | 1686 | 2129 |  |  |
| Model1 | 1(refrence) | 1.3936(1.2743-1.5244) | 1.9187(1.7609-2.0917) | 2.6152(2.4062-2.844) | <0.0001 | 1.2104(1.18-1.2415) |
| Model2 | 1(refrence) | 1.4211(1.2973-1.5572) | 2.0094(1.8375-2.1984) | 2.9068(2.6554-3.1837) | <0.0001 | 1.2761(1.2399-1.3132) |
| Model3 | 1(refrence) | 1.4926(1.3605-1.6379) | 2.1408(1.9526-2.3481) | 3.2873(2.9904-3.6157) | <0.0001 | 1.3102(1.2717-1.3498) |
| Non-severe liver disease | ≥0.00 & <0.07 | ≥0.07 & <0.11 | ≥0.11 & <0.22 | ≥0.22 & ≤41.19 |  |  |
| Person | 28775 | 28797 | 28749 | 28770 |  |  |
| Case | 2932 | 2866 | 4378 | 8614 |  |  |
| Model1 | 1(refrence) | 0.9742(0.9227-1.0285) | 1.5834(1.5063-1.6646) | 3.7669(3.5988-3.9438) | <0.0001 | 1.5148(1.4934-1.5366) |
| Model2 | 1(refrence) | 1.0976(1.0381-1.1605) | 1.6109(1.5295-1.6969) | 3.2667(3.1078-3.4344) | <0.0001 | 1.4249(1.4035-1.4467) |
| Model3 | 1(refrence) | 1.0961(1.0367-1.159) | 1.6058(1.5246-1.6917) | 3.2607(3.1019-3.4283) | <0.0001 | 1.4284(1.4069-1.4503) |
| Cancer | ≥0.00 & <0.07 | ≥0.07 & <0.13 | ≥0.13 & <0.30 | ≥0.30 & ≤9.02 |  |  |
| Person | 8841 | 8840 | 8842 | 8839 |  |  |
| Case | 839 | 990 | 1850 | 3351 |  |  |
| Model1 | 1(refrence) | 1.2028(1.0916-1.3256) | 2.5235(2.3125-2.7558) | 5.8237(5.3618-6.3314) | <0.0001 | 1.6187(1.5786-1.6604) |
| Model2 | 1(refrence) | 1.2149(1.1017-1.3399) | 2.4885(2.2728-2.7264) | 5.5773(5.0967-6.1082) | <0.0001 | 1.525(1.4851-1.5664) |
| Model3 | 1(refrence) | 1.3148(1.1908-1.452) | 2.7562(2.5124-3.0257) | 6.4445(5.8719-7.0789) | <0.0001 | 1.6434(1.5972-1.6914) |
| Age <60 | ≥0.00 & <0.07 | ≥0.07 & <0.14 | ≥0.14 & <0.44 | ≥0.44 & ≤41.19 |  |  |
| Person | 12258 | 12257 | 12258 | 12257 |  |  |
| Case | 923 | 764 | 1610 | 2809 |  |  |
| Model1 | 1(refrence) | 0.8164(0.7391-0.9015) | 1.8569(1.7058-2.0224) | 3.6512(3.3745-3.9538) | <0.0001 | 1.599(1.5656-1.6331) |
| Model2 | 1(refrence) | 0.8625(0.7787-0.955) | 1.4275(1.3021-1.5657) | 2.9794(2.7043-3.2841) | <0.0001 | 1.5191(1.4806-1.5587) |
| Model3 | 1(refrence) | 0.861(0.7772-0.9535) | 1.45(1.3221-1.5909) | 3.155(2.8606-3.4815) | <0.0001 | 1.5575(1.5171-1.599) |
| Age >60 | ≥0.00 & <0.07 | ≥0.07 & <0.12 | ≥0.12 & <0.26 | ≥0.26 & ≤28.11 |  |  |
| Person | 21191 | 21193 | 21173 | 21183 |  |  |
| Case | 2392 | 2624 | 4030 | 7241 |  |  |
| Model1 | 1(refrence) | 1.1106(1.047-1.1781) | 1.8475(1.7494-1.9515) | 4.0818(3.8788-4.2966) | <0.0001 | 1.5855(1.5597-1.6119) |
| Model2 | 1(refrence) | 1.1963(1.1264-1.2705) | 1.8452(1.7437-1.9529) | 3.5938(3.4005-3.799) | <0.0001 | 1.4921(1.4662-1.5187) |
| Model3 | 1(refrence) | 1.2066(1.1361-1.2815) | 1.8929(1.7885-2.0038) | 3.8437(3.634-4.0665) | <0.0001 | 1.5431(1.5151-1.5717) |
| Gender 0 | ≥0.00 & <0.07 | ≥0.07 & <0.12 | ≥0.12 & <0.32 | ≥0.32 & ≤10.91 |  |  |
| Person | 8841 | 8840 | 8842 | 8839 |  |  |
| Case | 839 | 990 | 1850 | 3351 |  |  |
| Model1 | 1(refrence) | 1.0949(1.0081-1.1892) | 1.7823(1.6515-1.9243) | 3.8075(3.5471-4.0895) | <0.0001 | 1.506(1.4758-1.5369) |
| Model2 | 1(refrence) | 1.2019(1.1036-1.309) | 1.8007(1.6624-1.9512) | 3.916(3.6102-4.2496) | <0.0001 | 1.5425(1.505-1.5813) |
| Model3 | 1(refrence) | 1.1935(1.0958-1.3) | 1.7893(1.6518-1.939) | 3.9336(3.6262-4.269) | <0.0001 | 1.5496(1.5117-1.5886) |
| Gender 1 | ≥0.00 & <0.07 | ≥0.07 & <0.12 | ≥0.12 & <0.32 | ≥0.32 & ≤10.91 |  |  |
| Person | 11948 | 11918 | 11931 | 11933 |  |  |
| Case | 1211 | 1310 | 1997 | 3585 |  |  |
| Model1 | 1(refrence) | 1.0949(1.0081-1.1892) | 1.7823(1.6515-1.9243) | 3.8075(3.5471-4.0895) | <0.0001 | 1.506(1.4758-1.5369) |
| Model2 | 1(refrence) | 1.2019(1.1036-1.309) | 1.8007(1.6624-1.9512) | 3.916(3.6102-4.2496) | <0.0001 | 1.5425(1.505-1.5813) |
| Model3 | 1(refrence) | 1.1935(1.0958-1.3) | 1.7893(1.6518-1.939) | 3.9336(3.6262-4.269) | <0.0001 | 1.5496(1.5117-1.5886) |
| NS | ≥0.00 & <0.07 | ≥0.07 & <0.13 | ≥0.13 & <0.35 | ≥0.35 & ≤41.19 |  |  |
| Person | 21995 | 21996 | 21993 | 21995 |  |  |
| Case | 2781 | 3293 | 4738 | 7131 |  |  |
| Model1 | 1(refrence) | 1.2165(1.1521-1.2844) | 1.8971(1.8027-1.9968) | 3.3146(3.1572-3.4807) | <0.0001 | 1.4076(1.3871-1.4285) |
| Model2 | 1(refrence) | 1.1485(1.0873-1.2132) | 1.7659(1.6753-1.8616) | 3.1525(2.9881-3.3266) | <0.0001 | 1.4108(1.3877-1.4345) |
| Model3 | 1(refrence) | 1.1426(1.0812-1.2075) | 1.7913(1.6981-1.8899) | 3.5504(3.3582-3.7544) | <0.0001 | 1.4939(1.4674-1.521) |
| NC | ≥0.00 & <0.08 | ≥0.08 & <0.14 | ≥0.14 & <0.42 | ≥0.42 & ≤7.87 |  |  |
| Person | 7042 | 7042 | 7041 | 7042 |  |  |
| Case | 544 | 648 | 1048 | 1794 |  |  |
| Model1 | 1(refrence) | 1.2106(1.0748-1.3639) | 2.0888(1.8733-2.3314) | 4.0833(3.6877-4.5278) | <0.0001 | 1.5917(1.5493-1.6355) |
| Model2 | 1(refrence) | 1.1481(1.0172-1.2963) | 2.0192(1.8046-2.2616) | 4.5888(4.0943-5.1494) | <0.0001 | 1.7055(1.6513-1.7619) |
| Model3 | 1(refrence) | 1.1901(1.0538-1.3444) | 2.1922(1.9564-2.4588) | 5.1624(4.5863-5.8176) | <0.0001 | 1.7428(1.6854-1.8026) |
| PSM | ≥0.00 & <0.08 | ≥0.08 & <0.17 | ≥0.17 & <0.46 | ≥0.46 & ≤10.91 |  |  |
| Person | 6285 | 6274 | 6279 | 6280 |  |  |
| Case | 2250 | 2133 | 2378 | 3460 |  |  |
| Model1 | 1(refrence) | 0.9237(0.8583-0.9941) | 1.0932(1.0167-1.1754) | 2.2003(2.0484-2.3639) | <0.0001 | 1.4296(1.3906-1.4703) |
| Model2 | 1(refrence) | 0.9237(0.8583-0.9941) | 1.0932(1.0167-1.1754) | 2.2003(2.0484-2.3639) | <0.0001 | 1.4296(1.3906-1.4703) |
| Model3 | 1(refrence) | 0.9596(0.8896-1.035) | 1.1639(1.077-1.2578) | 2.3456(2.1521-2.557) | <0.0001 | 1.4558(1.408-1.5059) |
| diabetes | ≥0.00 & <0.06 | ≥0.06 & <0.11 | ≥0.11 & <0.25 | ≥0.25 & ≤9.02 |  |  |
| Person | 10070 | 10039 | 10054 | 10054 |  |  |
| Case | 1062 | 1225 | 1874 | 3156 |  |  |
| Model1 | 1(refrence) | 1.1789(1.0804-1.2865) | 1.9432(1.7924-2.1077) | 3.8808(3.597-4.1898) | <0.0001 | 1.4642(1.4324-1.4969) |
| Model2 | 1(refrence) | 1.1789(1.0788-1.2885) | 1.9336(1.7785-2.1031) | 3.5899(3.3012-3.9061) | <0.0001 | 1.3941(1.3606-1.4286) |
| Model3 | 1(refrence) | 1.1892(1.0878-1.3002) | 1.9723(1.8132-2.1462) | 4.0995(3.7635-4.4678) | <0.0001 | 1.4937(1.4545-1.5343) |
| BMI18.5-24.9 | ≥0.00 & <0.07 | ≥0.07 & <0.12 | ≥0.12 & <0.26 | ≥0.26 & ≤28.11 |  |  |
| Person | 15507 | 15507 | 15501 | 15505 |  |  |
| Case | 1419 | 1477 | 2425 | 5118 |  |  |
| Model1 | 1(refrence) | 1.0452(0.9682-1.1283) | 1.8412(1.7175-1.9745) | 4.8919(4.5897-5.2169) | <0.0001 | 1.6499(1.6173-1.6835) |
| Model2 | 1(refrence) | 1.141(1.055-1.2341) | 1.8105(1.6835-1.9477) | 4.3829(4.0809-4.7094) | <0.0001 | 1.5849(1.5497-1.6212) |
| Model3 | 1(refrence) | 1.1281(1.0429-1.2203) | 1.7694(1.6448-1.904) | 4.2926(3.9961-4.6131) | <0.0001 | 1.5835(1.5485-1.6196) |
| BMI≥24.9 | ≥0.00 & <0.07 | ≥0.07 & <0.14 | ≥0.14 & <0.44 | ≥0.44 & ≤41.19 |  |  |
| Person | 14748 | 14758 | 14743 | 14742 |  |  |
| Case | 1518 | 1443 | 2306 | 3754 |  |  |
| Model1 | 1(refrence) | 0.9445(0.8754-1.0191) | 1.616(1.508-1.7321) | 2.9776(2.7915-3.1775) | <0.0001 | 1.4882(1.4608-1.516) |
| Model2 | 1(refrence) | 1.0235(0.9467-1.1066) | 1.547(1.4391-1.6634) | 2.785(2.5857-3.0006) | <0.0001 | 1.467(1.4356-1.4992) |
| Model3 | 1(refrence) | 1.0475(0.9687-1.1327) | 1.6612(1.5444-1.7873) | 3.3292(3.0811-3.5984) | <0.0001 | 1.5589(1.5232-1.5957) |
| MIMIC | ≥0.01 & <0.07 | ≥0.07 & <0.20 | ≥0.20 & <0.68 | ≥0.68 & ≤7.87 |  |  |
| Person | 12005 | 12015 | 11925 | 11980 |  |  |
| Case | 1837 | 1865 | 1927 | 3212 |  |  |
| Model1 | 1(refrence) | 1.017(0.9482-1.0909) | 1.0668(0.9951-1.1438) | 2.0277(1.9021-2.1621) | <0.0001 | 1.406(1.3786-1.4341) |
| Model2 | 1(refrence) | 0.9523(0.8865-1.023) | 1.064(0.9884-1.1454) | 2.3221(2.157-2.5004) | <0.0001 | 1.5264(1.4919-1.5617) |
| Model3 | 1(refrence) | 0.9917(0.9228-1.0657) | 1.1689(1.0842-1.2603) | 2.7312(2.525-2.9548) | <0.0001 | 1.6082(1.5696-1.6478) |

**sTable 9.** **Model Fit Statistics for HTR Trajectories (3-5 Days &5-7 Days).**

| **Items** | **Group** | **class_label** | **TIME** | **Survived_n** | **Survived_Mean ± SD** | **Died_n** | **Died_Mean ± SD** | **W statistic** | **Raw p-value** | **Adjusted p-value** | **Cohen's d** |
| --- | --- | --- | --- | --- | --- | --- | --- | --- | --- | --- | --- |
| age<60 | 5_7 | Class 1 (n=401) | TIME 1 | 371 | 0.1 ± 0.1 | 30 | 0.1 ± 0.1 | 5,863 | 0.6267 | 1.0000 | 0.03 |
| age<60 | 5_7 | Class 1 (n=401) | TIME 2 | 371 | 0.1 ± 0.1 | 30 | 0.1 ± 0.1 | 5,539 | 0.9667 | 1.0000 | -0.11 |
| age<60 | 5_7 | Class 1 (n=401) | TIME 3 | 371 | 0.1 ± 0.1 | 30 | 0.1 ± 0.1 | 3,841 | 0.0048 | 0.0286 | -0.86 |
| age<60 | 3_5 | Class 1 (n=404) | TIME 1 | 302 | 0.1 ± 0.1 | 102 | 0.1 ± 0.1 | 18,819 | 0.0008 | 0.0048 | 0.33 |
| age<60 | 3_5 | Class 1 (n=404) | TIME 2 | 302 | 0.1 ± 0.1 | 102 | 0.1 ± 0.1 | 16,824 | 0.1634 | 0.9805 | 0.14 |
| age<60 | 3_5 | Class 1 (n=404) | TIME 3 | 302 | 0.1 ± 0.1 | 102 | 0.1 ± 0.1 | 13,729 | 0.1009 | 0.6056 | -0.31 |
| age<60 | 5_7 | Class 2 (n=100) | TIME 1 | 55 | 1.0 ± 1.0 | 45 | 1.4 ± 1.5 | 1,178 | 0.6827 | 1.0000 | -0.27 |
| age<60 | 5_7 | Class 2 (n=100) | TIME 2 | 55 | 0.8 ± 0.7 | 45 | 1.5 ± 1.2 | 880 | 0.0134 | 0.0803 | -0.65 |
| age<60 | 5_7 | Class 2 (n=100) | TIME 3 | 55 | 0.8 ± 0.8 | 45 | 1.8 ± 1.3 | 656 | 0.0001 | 0.0003 | -0.90 |
| age<60 | 3_5 | Class 2 (n=196) | TIME 1 | 116 | 1.2 ± 1.1 | 80 | 1.4 ± 1.2 | 4,458 | 0.6419 | 1.0000 | -0.15 |
| age<60 | 3_5 | Class 2 (n=196) | TIME 2 | 116 | 1.0 ± 0.9 | 80 | 1.6 ± 1.1 | 3,227 | 0.0003 | 0.0018 | -0.54 |
| age<60 | 3_5 | Class 2 (n=196) | TIME 3 | 116 | 1.0 ± 1.0 | 80 | 1.7 ± 1.1 | 2,526 | <0.0001 | <0.0001 | -0.65 |
| age>60 | 5_7 | Class 1 (n=424) | TIME 1 | 260 | 0.1 ± 0.1 | 164 | 0.1 ± 0.1 | 22,880 | 0.2046 | 1.0000 | 0.13 |
| age>60 | 5_7 | Class 1 (n=424) | TIME 2 | 260 | 0.1 ± 0.1 | 164 | 0.1 ± 0.1 | 21,130 | 0.8771 | 1.0000 | -0.06 |
| age>60 | 5_7 | Class 1 (n=424) | TIME 3 | 260 | 0.1 ± 0.1 | 164 | 0.2 ± 0.1 | 17,210 | 0.0008 | 0.0050 | -0.53 |
| age>60 | 3_5 | Class 1 (n=788) | TIME 1 | 394 | 0.2 ± 0.4 | 394 | 0.3 ± 0.6 | 73,216 | 0.1682 | 0.5047 | -0.21 |
| age>60 | 3_5 | Class 1 (n=788) | TIME 2 | 394 | 0.2 ± 0.3 | 394 | 0.4 ± 0.7 | 60,670 | <0.0001 | <0.0001 | -0.36 |
| age>60 | 3_5 | Class 1 (n=788) | TIME 3 | 394 | 0.2 ± 0.3 | 394 | 0.5 ± 0.8 | 50,284 | <0.0001 | <0.0001 | -0.49 |
| age>60 | 3_5 | Class 2 (n=1) | TIME 1 | NA | NA | 1 | 0.7 ± NA | NA | NA | NA | NA |
| age>60 | 3_5 | Class 2 (n=1) | TIME 2 | NA | NA | 1 | 3.3 ± NA | NA | NA | NA | NA |
| age>60 | 3_5 | Class 2 (n=1) | TIME 3 | NA | NA | 1 | 1.2 ± NA | NA | NA | NA | NA |
| age>60 | 5_7 | Class 2 (n=81) | TIME 1 | 22 | 0.9 ± 0.6 | 59 | 0.9 ± 1.1 | 797 | 0.1173 | 0.7039 | 0.02 |
| age>60 | 5_7 | Class 2 (n=81) | TIME 2 | 22 | 0.9 ± 0.6 | 59 | 0.9 ± 0.8 | 744 | 0.3182 | 1.0000 | 0.02 |
| age>60 | 5_7 | Class 2 (n=81) | TIME 3 | 22 | 0.9 ± 0.7 | 59 | 1.4 ± 1.2 | 446 | 0.0315 | 0.1892 | -0.46 |
| BMI≥24.9 | 5_7 | Class 1 (n=422) | TIME 1 | 322 | 0.1 ± 0.1 | 100 | 0.1 ± 0.1 | 16,917 | 0.4434 | 1.0000 | 0.06 |
| BMI≥24.9 | 5_7 | Class 1 (n=422) | TIME 2 | 322 | 0.1 ± 0.1 | 100 | 0.1 ± 0.1 | 15,549 | 0.6054 | 1.0000 | -0.15 |
| BMI≥24.9 | 5_7 | Class 1 (n=422) | TIME 3 | 322 | 0.1 ± 0.1 | 100 | 0.1 ± 0.1 | 12,167 | 0.0002 | 0.0013 | -0.73 |
| BMI≥24.9 | 3_5 | Class 1 (n=626) | TIME 1 | 413 | 0.1 ± 0.1 | 213 | 0.1 ± 0.1 | 51,985 | 0.0002 | 0.0011 | 0.38 |
| BMI≥24.9 | 3_5 | Class 1 (n=626) | TIME 2 | 413 | 0.1 ± 0.1 | 213 | 0.1 ± 0.1 | 44,100 | 0.9574 | 1.0000 | 0.03 |
| BMI≥24.9 | 3_5 | Class 1 (n=626) | TIME 3 | 413 | 0.1 ± 0.1 | 213 | 0.1 ± 0.1 | 36,677 | 0.0007 | 0.0039 | -0.41 |
| BMI≥24.9 | 5_7 | Class 2 (n=128) | TIME 1 | 54 | 0.9 ± 0.8 | 74 | 1.1 ± 1.4 | 1,949 | 0.8150 | 1.0000 | -0.25 |
| BMI≥24.9 | 5_7 | Class 2 (n=128) | TIME 2 | 54 | 0.8 ± 0.7 | 74 | 1.2 ± 1.1 | 1,540 | 0.0273 | 0.1637 | -0.42 |
| BMI≥24.9 | 5_7 | Class 2 (n=128) | TIME 3 | 54 | 0.8 ± 0.8 | 74 | 1.5 ± 1.2 | 1,077 | <0.0001 | 0.0001 | -0.73 |
| BMI≥24.9 | 3_5 | Class 2 (n=259) | TIME 1 | 124 | 1.1 ± 1.0 | 135 | 1.2 ± 1.2 | 8,207 | 0.7867 | 1.0000 | -0.17 |
| BMI≥24.9 | 3_5 | Class 2 (n=259) | TIME 2 | 124 | 1.0 ± 0.9 | 135 | 1.4 ± 1.1 | 5,996 | 0.0001 | 0.0005 | -0.44 |
| BMI≥24.9 | 3_5 | Class 2 (n=259) | TIME 3 | 124 | 1.0 ± 0.9 | 135 | 1.6 ± 1.1 | 4,575 | <0.0001 | <0.0001 | -0.62 |
| BMI18.5-24.9 | 5_7 | Class 1 (n=345) | TIME 1 | 274 | 0.1 ± 0.1 | 71 | 0.1 ± 0.1 | 10,711 | 0.1893 | 1.0000 | 0.02 |
| BMI18.5-24.9 | 5_7 | Class 1 (n=345) | TIME 2 | 274 | 0.1 ± 0.1 | 71 | 0.1 ± 0.1 | 10,152 | 0.5713 | 1.0000 | -0.07 |
| BMI18.5-24.9 | 5_7 | Class 1 (n=345) | TIME 3 | 274 | 0.1 ± 0.1 | 71 | 0.2 ± 0.1 | 6,838 | 0.0001 | 0.0007 | -0.84 |
| BMI18.5-24.9 | 3_5 | Class 1 (n=442) | TIME 1 | 256 | 0.3 ± 0.6 | 186 | 0.3 ± 0.5 | 23,817 | 0.9952 | 1.0000 | 0.05 |
| BMI18.5-24.9 | 3_5 | Class 1 (n=442) | TIME 2 | 256 | 0.2 ± 0.4 | 186 | 0.3 ± 0.6 | 20,897 | 0.0281 | 0.0844 | -0.19 |
| BMI18.5-24.9 | 3_5 | Class 1 (n=442) | TIME 3 | 256 | 0.2 ± 0.4 | 186 | 0.4 ± 0.6 | 17,261 | <0.0001 | <0.0001 | -0.34 |
| BMI18.5-24.9 | 5_7 | Class 2 (n=55) | TIME 1 | 26 | 1.0 ± 0.9 | 29 | 0.9 ± 1.0 | 518 | 0.0179 | 0.1071 | 0.19 |
| BMI18.5-24.9 | 5_7 | Class 2 (n=55) | TIME 2 | 26 | 0.8 ± 0.5 | 29 | 1.0 ± 0.9 | 407 | 0.6190 | 1.0000 | -0.26 |
| BMI18.5-24.9 | 5_7 | Class 2 (n=55) | TIME 3 | 26 | 0.8 ± 0.6 | 29 | 1.5 ± 1.5 | 236 | 0.0179 | 0.1071 | -0.61 |
| cancer | 5_7 | Class 1 (n=125) | TIME 1 | 65 | 0.1 ± 0.1 | 60 | 0.1 ± 0.1 | 2,062 | 0.5816 | 1.0000 | 0.11 |
| cancer | 5_7 | Class 1 (n=125) | TIME 2 | 65 | 0.1 ± 0.1 | 60 | 0.2 ± 0.1 | 1,745 | 0.3110 | 1.0000 | -0.28 |
| cancer | 5_7 | Class 1 (n=125) | TIME 3 | 65 | 0.1 ± 0.1 | 60 | 0.2 ± 0.2 | 1,524 | 0.0355 | 0.2130 | -0.44 |
| cancer | 3_5 | Class 1 (n=214) | TIME 1 | 107 | 0.2 ± 0.1 | 107 | 0.1 ± 0.1 | 7,417 | 0.0002 | 0.0011 | 0.55 |
| cancer | 3_5 | Class 1 (n=214) | TIME 2 | 107 | 0.2 ± 0.1 | 107 | 0.2 ± 0.1 | 5,913 | 0.6789 | 1.0000 | 0.08 |
| cancer | 3_5 | Class 1 (n=214) | TIME 3 | 107 | 0.1 ± 0.1 | 107 | 0.2 ± 0.2 | 4,227 | 0.0009 | 0.0057 | -0.53 |
| cancer | 5_7 | Class 2 (n=28) | TIME 1 | 8 | 1.2 ± 1.2 | 20 | 0.7 ± 0.5 | 92 | 0.5587 | 1.0000 | 0.61 |
| cancer | 5_7 | Class 2 (n=28) | TIME 2 | 8 | 1.2 ± 1.0 | 20 | 0.9 ± 0.6 | 100 | 0.3214 | 1.0000 | 0.45 |
| cancer | 5_7 | Class 2 (n=28) | TIME 3 | 8 | 1.2 ± 1.2 | 20 | 1.7 ± 1.5 | 48 | 0.1092 | 0.6550 | -0.32 |
| cancer | 3_5 | Class 2 (n=55) | TIME 1 | 8 | 1.1 ± 0.5 | 47 | 0.9 ± 0.7 | 248 | 0.1555 | 0.9329 | 0.34 |
| cancer | 3_5 | Class 2 (n=55) | TIME 2 | 8 | 1.0 ± 0.5 | 47 | 1.2 ± 0.9 | 173 | 0.7292 | 1.0000 | -0.25 |
| cancer | 3_5 | Class 2 (n=55) | TIME 3 | 8 | 0.8 ± 0.5 | 47 | 1.3 ± 0.8 | 108 | 0.0577 | 0.3463 | -0.57 |
| chronic_pulmonary_disease | 3_5 | Class 1 (n=182) | TIME 1 | 105 | 0.1 ± 0.1 | 77 | 0.1 ± 0.0 | 4,220 | 0.6142 | 1.0000 | 0.17 |
| chronic_pulmonary_disease | 3_5 | Class 1 (n=182) | TIME 2 | 105 | 0.1 ± 0.1 | 77 | 0.1 ± 0.0 | 3,629 | 0.2395 | 1.0000 | -0.12 |
| chronic_pulmonary_disease | 3_5 | Class 1 (n=182) | TIME 3 | 105 | 0.1 ± 0.0 | 77 | 0.1 ± 0.1 | 3,195 | 0.0159 | 0.0951 | -0.39 |
| chronic_pulmonary_disease | 5_7 | Class 2 (n=146) | TIME 1 | 85 | 0.2 ± 0.4 | 61 | 0.5 ± 0.8 | 2,014 | 0.0218 | 0.0655 | -0.41 |
| chronic_pulmonary_disease | 5_7 | Class 2 (n=146) | TIME 2 | 85 | 0.2 ± 0.5 | 61 | 0.5 ± 0.8 | 1,925 | 0.0081 | 0.0244 | -0.45 |
| chronic_pulmonary_disease | 5_7 | Class 2 (n=146) | TIME 3 | 85 | 0.2 ± 0.5 | 61 | 0.7 ± 0.9 | 1,649 | 0.0002 | 0.0005 | -0.65 |
| chronic_pulmonary_disease | 3_5 | Class 2 (n=84) | TIME 1 | 34 | 0.8 ± 0.8 | 50 | 0.5 ± 0.5 | 1,156 | 0.0054 | 0.0322 | 0.47 |
| chronic_pulmonary_disease | 3_5 | Class 2 (n=84) | TIME 2 | 34 | 0.7 ± 0.8 | 50 | 0.6 ± 0.6 | 927 | 0.4886 | 1.0000 | 0.16 |
| chronic_pulmonary_disease | 3_5 | Class 2 (n=84) | TIME 3 | 34 | 0.7 ± 0.8 | 50 | 0.8 ± 0.6 | 681 | 0.1235 | 0.7412 | -0.10 |
| congestive_heart_failure | 3_5 | Class 1 (n=352) | TIME 1 | 196 | 0.1 ± 0.1 | 156 | 0.1 ± 0.1 | 14,505 | 0.4093 | 1.0000 | -0.01 |
| congestive_heart_failure | 3_5 | Class 1 (n=352) | TIME 2 | 196 | 0.1 ± 0.1 | 156 | 0.1 ± 0.1 | 13,258 | 0.0323 | 0.1939 | -0.22 |
| congestive_heart_failure | 3_5 | Class 1 (n=352) | TIME 3 | 196 | 0.1 ± 0.1 | 156 | 0.2 ± 0.1 | 10,812 | <0.0001 | <0.0001 | -0.60 |
| congestive_heart_failure | 3_5 | Class 2 (n=106) | TIME 1 | 26 | 0.7 ± 0.6 | 80 | 0.6 ± 0.8 | 1,381 | 0.0124 | 0.0745 | 0.13 |
| congestive_heart_failure | 3_5 | Class 2 (n=106) | TIME 2 | 26 | 0.6 ± 0.5 | 80 | 0.7 ± 0.7 | 1,102 | 0.6542 | 1.0000 | -0.09 |
| congestive_heart_failure | 3_5 | Class 2 (n=106) | TIME 3 | 26 | 0.6 ± 0.4 | 80 | 0.9 ± 0.7 | 728 | 0.0222 | 0.1331 | -0.46 |
| congestive_heart_failure | 5_7 | Class NA (n=362) | TIME 1 | 249 | 0.1 ± 0.2 | 113 | 0.2 ± 0.2 | 11,049 | 0.0011 | 0.0032 | -0.27 |
| congestive_heart_failure | 5_7 | Class NA (n=362) | TIME 2 | 249 | 0.1 ± 0.2 | 113 | 0.3 ± 0.3 | 9,785 | <0.0001 | <0.0001 | -0.60 |
| congestive_heart_failure | 5_7 | Class NA (n=362) | TIME 3 | 249 | 0.1 ± 0.2 | 113 | 0.5 ± 0.8 | 7,685 | <0.0001 | <0.0001 | -0.71 |
| diabetes | 5_7 | Class 1 (n=195) | TIME 1 | 118 | 0.1 ± 0.1 | 77 | 0.1 ± 0.1 | 4,441 | 0.7912 | 1.0000 | -0.00 |
| diabetes | 5_7 | Class 1 (n=195) | TIME 2 | 118 | 0.1 ± 0.1 | 77 | 0.1 ± 0.1 | 4,512 | 0.9369 | 1.0000 | -0.13 |
| diabetes | 5_7 | Class 1 (n=195) | TIME 3 | 118 | 0.1 ± 0.1 | 77 | 0.2 ± 0.1 | 3,611 | 0.0156 | 0.0936 | -0.51 |
| diabetes | 3_5 | Class 1 (n=346) | TIME 1 | 198 | 0.1 ± 0.1 | 148 | 0.1 ± 0.1 | 16,065 | 0.1251 | 0.7503 | 0.26 |
| diabetes | 3_5 | Class 1 (n=346) | TIME 2 | 198 | 0.1 ± 0.1 | 148 | 0.1 ± 0.1 | 13,177 | 0.1091 | 0.6545 | -0.18 |
| diabetes | 3_5 | Class 1 (n=346) | TIME 3 | 198 | 0.1 ± 0.1 | 148 | 0.2 ± 0.1 | 10,684 | <0.0001 | 0.0001 | -0.57 |
| diabetes | 5_7 | Class 2 (n=37) | TIME 1 | 15 | 0.9 ± 0.8 | 22 | 1.1 ± 1.5 | 189 | 0.4673 | 1.0000 | -0.10 |
| diabetes | 5_7 | Class 2 (n=37) | TIME 2 | 15 | 1.0 ± 1.0 | 22 | 0.9 ± 0.8 | 163 | 0.9630 | 1.0000 | 0.07 |
| diabetes | 5_7 | Class 2 (n=37) | TIME 3 | 15 | 1.0 ± 0.9 | 22 | 1.3 ± 0.9 | 115 | 0.1257 | 0.7542 | -0.33 |
| diabetes | 3_5 | Class 2 (n=95) | TIME 1 | 32 | 1.1 ± 1.1 | 63 | 1.1 ± 1.2 | 1,170 | 0.2035 | 1.0000 | 0.05 |
| diabetes | 3_5 | Class 2 (n=95) | TIME 2 | 32 | 0.9 ± 0.6 | 63 | 1.3 ± 1.2 | 954 | 0.6736 | 1.0000 | -0.36 |
| diabetes | 3_5 | Class 2 (n=95) | TIME 3 | 32 | 0.9 ± 0.6 | 63 | 1.4 ± 1.2 | 666 | 0.0072 | 0.0430 | -0.54 |
| gender0 | 5_7 | Class 1 (n=312) | TIME 1 | 235 | 0.1 ± 0.1 | 77 | 0.1 ± 0.1 | 9,974 | 0.1777 | 1.0000 | -0.00 |
| gender0 | 5_7 | Class 1 (n=312) | TIME 2 | 235 | 0.1 ± 0.1 | 77 | 0.1 ± 0.1 | 8,392 | 0.3400 | 1.0000 | -0.32 |
| gender0 | 5_7 | Class 1 (n=312) | TIME 3 | 235 | 0.1 ± 0.1 | 77 | 0.2 ± 0.1 | 5,933 | <0.0001 | <0.0001 | -0.95 |
| gender0 | 3_5 | Class 1 (n=410) | TIME 1 | 257 | 0.1 ± 0.1 | 153 | 0.1 ± 0.1 | 20,166 | 0.6634 | 1.0000 | 0.19 |
| gender0 | 3_5 | Class 1 (n=410) | TIME 2 | 257 | 0.1 ± 0.1 | 153 | 0.1 ± 0.1 | 16,102 | 0.0022 | 0.0130 | -0.23 |
| gender0 | 3_5 | Class 1 (n=410) | TIME 3 | 257 | 0.1 ± 0.1 | 153 | 0.1 ± 0.1 | 12,918 | <0.0001 | <0.0001 | -0.71 |
| gender0 | 3_5 | Class 2 (n=170) | TIME 1 | 84 | 0.8 ± 0.7 | 86 | 1.1 ± 1.2 | 3,529 | 0.7971 | 1.0000 | -0.26 |
| gender0 | 3_5 | Class 2 (n=170) | TIME 2 | 84 | 0.8 ± 0.7 | 86 | 1.3 ± 1.1 | 2,664 | 0.0031 | 0.0189 | -0.48 |
| gender0 | 3_5 | Class 2 (n=170) | TIME 3 | 84 | 0.8 ± 0.7 | 86 | 1.3 ± 0.9 | 1,984 | <0.0001 | <0.0001 | -0.63 |
| gender0 | 5_7 | Class 2 (n=72) | TIME 1 | 26 | 1.0 ± 0.7 | 46 | 1.1 ± 1.2 | 662 | 0.4601 | 1.0000 | -0.13 |
| gender0 | 5_7 | Class 2 (n=72) | TIME 2 | 26 | 1.0 ± 0.7 | 46 | 1.2 ± 1.0 | 583 | 0.8650 | 1.0000 | -0.24 |
| gender0 | 5_7 | Class 2 (n=72) | TIME 3 | 26 | 0.9 ± 0.8 | 46 | 1.6 ± 1.4 | 371 | 0.0079 | 0.0475 | -0.56 |
| gender1 | 5_7 | Class 1 (n=312) | TIME 1 | 235 | 0.1 ± 0.1 | 77 | 0.1 ± 0.1 | 9,974 | 0.1777 | 1.0000 | -0.00 |
| gender1 | 5_7 | Class 1 (n=312) | TIME 2 | 235 | 0.1 ± 0.1 | 77 | 0.1 ± 0.1 | 8,392 | 0.3400 | 1.0000 | -0.32 |
| gender1 | 5_7 | Class 1 (n=312) | TIME 3 | 235 | 0.1 ± 0.1 | 77 | 0.2 ± 0.1 | 5,933 | <0.0001 | <0.0001 | -0.95 |
| gender1 | 3_5 | Class 1 (n=410) | TIME 1 | 257 | 0.1 ± 0.1 | 153 | 0.1 ± 0.1 | 20,166 | 0.6634 | 1.0000 | 0.19 |
| gender1 | 3_5 | Class 1 (n=410) | TIME 2 | 257 | 0.1 ± 0.1 | 153 | 0.1 ± 0.1 | 16,102 | 0.0022 | 0.0130 | -0.23 |
| gender1 | 3_5 | Class 1 (n=410) | TIME 3 | 257 | 0.1 ± 0.1 | 153 | 0.1 ± 0.1 | 12,918 | <0.0001 | <0.0001 | -0.71 |
| gender1 | 3_5 | Class 2 (n=170) | TIME 1 | 84 | 0.8 ± 0.7 | 86 | 1.1 ± 1.2 | 3,529 | 0.7971 | 1.0000 | -0.26 |
| gender1 | 3_5 | Class 2 (n=170) | TIME 2 | 84 | 0.8 ± 0.7 | 86 | 1.3 ± 1.1 | 2,664 | 0.0031 | 0.0189 | -0.48 |
| gender1 | 3_5 | Class 2 (n=170) | TIME 3 | 84 | 0.8 ± 0.7 | 86 | 1.3 ± 0.9 | 1,984 | <0.0001 | <0.0001 | -0.63 |
| gender1 | 5_7 | Class 2 (n=72) | TIME 1 | 26 | 1.0 ± 0.7 | 46 | 1.1 ± 1.2 | 662 | 0.4601 | 1.0000 | -0.13 |
| gender1 | 5_7 | Class 2 (n=72) | TIME 2 | 26 | 1.0 ± 0.7 | 46 | 1.2 ± 1.0 | 583 | 0.8650 | 1.0000 | -0.24 |
| gender1 | 5_7 | Class 2 (n=72) | TIME 3 | 26 | 0.9 ± 0.8 | 46 | 1.6 ± 1.4 | 371 | 0.0079 | 0.0475 | -0.56 |
| HIS | 3_5 | Class 1 (n=158) | TIME 1 | 72 | 0.1 ± 0.1 | 86 | 0.1 ± 0.1 | 2,763 | 0.2457 | 1.0000 | -0.24 |
| HIS | 3_5 | Class 1 (n=158) | TIME 2 | 72 | 0.1 ± 0.1 | 86 | 0.1 ± 0.1 | 2,355 | 0.0097 | 0.0581 | -0.42 |
| HIS | 3_5 | Class 1 (n=158) | TIME 3 | 72 | 0.1 ± 0.1 | 86 | 0.2 ± 0.1 | 1,460 | <0.0001 | <0.0001 | -0.99 |
| HIS | 5_7 | Class 1 (n=414) | TIME 1 | 366 | 0.1 ± 0.0 | 48 | 0.1 ± 0.1 | 9,388 | 0.4388 | 1.0000 | -0.01 |
| HIS | 5_7 | Class 1 (n=414) | TIME 2 | 366 | 0.1 ± 0.1 | 48 | 0.1 ± 0.1 | 9,378 | 0.4464 | 1.0000 | -0.06 |
| HIS | 5_7 | Class 1 (n=414) | TIME 3 | 366 | 0.1 ± 0.0 | 48 | 0.2 ± 0.1 | 4,475 | <0.0001 | <0.0001 | -1.40 |
| HIS | 5_7 | Class 2 (n=31) | TIME 1 | 9 | 0.8 ± 1.0 | 22 | 0.6 ± 0.8 | 126 | 0.2488 | 1.0000 | 0.24 |
| HIS | 5_7 | Class 2 (n=31) | TIME 2 | 9 | 0.7 ± 0.4 | 22 | 0.9 ± 0.8 | 109 | 0.6793 | 1.0000 | -0.18 |
| HIS | 5_7 | Class 2 (n=31) | TIME 3 | 9 | 0.9 ± 0.5 | 22 | 1.7 ± 1.8 | 76 | 0.3275 | 1.0000 | -0.50 |
| HIS | 3_5 | Class 2 (n=44) | TIME 1 | 5 | 0.4 ± 0.3 | 39 | 0.6 ± 0.8 | 97 | 1.0000 | 1.0000 | -0.22 |
| HIS | 3_5 | Class 2 (n=44) | TIME 2 | 5 | 0.6 ± 0.3 | 39 | 0.8 ± 0.9 | 100 | 0.9410 | 1.0000 | -0.32 |
| HIS | 3_5 | Class 2 (n=44) | TIME 3 | 5 | 1.0 ± 0.6 | 39 | 1.0 ± 0.8 | 110 | 0.6572 | 1.0000 | 0.05 |
| MIMIC | 5_7 | Class 1 (n=412) | TIME 1 | 265 | 0.1 ± 0.1 | 147 | 0.1 ± 0.1 | 19,120 | 0.7578 | 1.0000 | 0.02 |
| MIMIC | 5_7 | Class 1 (n=412) | TIME 2 | 265 | 0.1 ± 0.1 | 147 | 0.1 ± 0.1 | 18,150 | 0.2516 | 1.0000 | -0.13 |
| MIMIC | 5_7 | Class 1 (n=412) | TIME 3 | 265 | 0.1 ± 0.1 | 147 | 0.1 ± 0.1 | 16,058 | 0.0031 | 0.0189 | -0.47 |
| MIMIC | 3_5 | Class 1 (n=853) | TIME 1 | 557 | 0.1 ± 0.1 | 296 | 0.1 ± 0.1 | 95,512 | 0.0001 | 0.0008 | 0.33 |
| MIMIC | 3_5 | Class 1 (n=853) | TIME 2 | 557 | 0.1 ± 0.1 | 296 | 0.1 ± 0.1 | 82,001 | 0.8989 | 1.0000 | -0.01 |
| MIMIC | 3_5 | Class 1 (n=853) | TIME 3 | 557 | 0.1 ± 0.1 | 296 | 0.1 ± 0.1 | 68,213 | <0.0001 | 0.0002 | -0.42 |
| MIMIC | 5_7 | Class 2 (n=149) | TIME 1 | 68 | 1.0 ± 0.8 | 81 | 1.2 ± 1.4 | 2,950 | 0.4574 | 1.0000 | -0.17 |
| MIMIC | 5_7 | Class 2 (n=149) | TIME 2 | 68 | 0.9 ± 0.7 | 81 | 1.2 ± 1.1 | 2,267 | 0.0635 | 0.3807 | -0.42 |
| MIMIC | 5_7 | Class 2 (n=149) | TIME 3 | 68 | 0.8 ± 0.8 | 81 | 1.5 ± 1.1 | 1,500 | <0.0001 | <0.0001 | -0.75 |
| MIMIC | 3_5 | Class 2 (n=334) | TIME 1 | 178 | 1.1 ± 1.0 | 156 | 1.2 ± 1.1 | 13,306 | 0.5119 | 1.0000 | -0.16 |
| MIMIC | 3_5 | Class 2 (n=334) | TIME 2 | 178 | 0.9 ± 0.8 | 156 | 1.4 ± 1.1 | 9,781 | <0.0001 | <0.0001 | -0.50 |
| MIMIC | 3_5 | Class 2 (n=334) | TIME 3 | 178 | 0.9 ± 0.8 | 156 | 1.6 ± 1.1 | 7,271 | <0.0001 | <0.0001 | -0.69 |
| NC | 5_7 | Class 1 (n=1) | TIME 1 | 1 | 0.1 ± NA | NA | NA | NA | NA | NA | NA |
| NC | 5_7 | Class 1 (n=1) | TIME 2 | 1 | 1.4 ± NA | NA | NA | NA | NA | NA | NA |
| NC | 5_7 | Class 1 (n=1) | TIME 3 | 1 | 0.0 ± NA | NA | NA | NA | NA | NA | NA |
| NC | 3_5 | Class 1 (n=224) | TIME 1 | 157 | 0.2 ± 0.1 | 67 | 0.1 ± 0.1 | 6,496 | 0.0054 | 0.0324 | 0.51 |
| NC | 3_5 | Class 1 (n=224) | TIME 2 | 157 | 0.1 ± 0.1 | 67 | 0.1 ± 0.1 | 4,668 | 0.1833 | 1.0000 | -0.14 |
| NC | 3_5 | Class 1 (n=224) | TIME 3 | 157 | 0.1 ± 0.1 | 67 | 0.2 ± 0.1 | 3,265 | <0.0001 | <0.0001 | -0.82 |
| NC | 5_7 | Class 2 (n=180) | TIME 1 | 124 | 0.3 ± 0.3 | 56 | 0.5 ± 0.9 | 2,811 | 0.0413 | 0.1238 | -0.51 |
| NC | 5_7 | Class 2 (n=180) | TIME 2 | 124 | 0.2 ± 0.3 | 56 | 0.6 ± 0.9 | 2,440 | 0.0014 | 0.0043 | -0.66 |
| NC | 5_7 | Class 2 (n=180) | TIME 3 | 124 | 0.2 ± 0.4 | 56 | 0.7 ± 0.9 | 2,263 | 0.0002 | 0.0006 | -0.80 |
| NC | 3_5 | Class 2 (n=99) | TIME 1 | 51 | 1.2 ± 1.2 | 48 | 1.1 ± 1.1 | 1,367 | 0.3184 | 1.0000 | 0.09 |
| NC | 3_5 | Class 2 (n=99) | TIME 2 | 51 | 1.1 ± 1.1 | 48 | 1.3 ± 1.1 | 1,003 | 0.1226 | 0.7358 | -0.22 |
| NC | 3_5 | Class 2 (n=99) | TIME 3 | 51 | 1.0 ± 1.1 | 48 | 1.6 ± 1.2 | 644 | <0.0001 | 0.0003 | -0.50 |
| NOsevere_liver_disease | 5_7 | Class 1 (n=765) | TIME 1 | 593 | 0.1 ± 0.1 | 172 | 0.1 ± 0.1 | 56,264 | 0.0391 | 0.2344 | 0.09 |
| NOsevere_liver_disease | 5_7 | Class 1 (n=765) | TIME 2 | 593 | 0.1 ± 0.1 | 172 | 0.1 ± 0.1 | 52,743 | 0.4942 | 1.0000 | -0.09 |
| NOsevere_liver_disease | 5_7 | Class 1 (n=765) | TIME 3 | 593 | 0.1 ± 0.0 | 172 | 0.1 ± 0.1 | 39,667 | <0.0001 | 0.0001 | -0.75 |
| NOsevere_liver_disease | 3_5 | Class 1 (n=863) | TIME 1 | 528 | 0.1 ± 0.1 | 335 | 0.1 ± 0.1 | 93,274 | 0.1756 | 1.0000 | 0.13 |
| NOsevere_liver_disease | 3_5 | Class 1 (n=863) | TIME 2 | 528 | 0.1 ± 0.1 | 335 | 0.1 ± 0.1 | 82,058 | 0.0737 | 0.4423 | -0.11 |
| NOsevere_liver_disease | 3_5 | Class 1 (n=863) | TIME 3 | 528 | 0.1 ± 0.1 | 335 | 0.1 ± 0.1 | 66,467 | <0.0001 | <0.0001 | -0.55 |
| NOsevere_liver_disease | 5_7 | Class 2 (n=104) | TIME 1 | 38 | 0.7 ± 0.8 | 66 | 0.5 ± 0.8 | 1,569 | 0.0338 | 0.2025 | 0.24 |
| NOsevere_liver_disease | 5_7 | Class 2 (n=104) | TIME 2 | 38 | 0.8 ± 0.8 | 66 | 0.6 ± 0.5 | 1,466 | 0.1534 | 0.9202 | 0.32 |
| NOsevere_liver_disease | 5_7 | Class 2 (n=104) | TIME 3 | 38 | 0.8 ± 0.9 | 66 | 1.1 ± 1.1 | 908 | 0.0197 | 0.1181 | -0.26 |
| NOsevere_liver_disease | 3_5 | Class 2 (n=211) | TIME 1 | 82 | 0.5 ± 0.4 | 129 | 0.5 ± 0.6 | 6,206 | 0.0341 | 0.2046 | -0.03 |
| NOsevere_liver_disease | 3_5 | Class 2 (n=211) | TIME 2 | 82 | 0.5 ± 0.3 | 129 | 0.8 ± 0.7 | 4,572 | 0.0972 | 0.5832 | -0.37 |
| NOsevere_liver_disease | 3_5 | Class 2 (n=211) | TIME 3 | 82 | 0.5 ± 0.4 | 129 | 1.0 ± 0.8 | 2,865 | <0.0001 | <0.0001 | -0.62 |
| NS | 5_7 | Class 1 (n=392) | TIME 1 | 223 | 0.1 ± 0.1 | 169 | 0.1 ± 0.1 | 18,365 | 0.6670 | 1.0000 | -0.02 |
| NS | 5_7 | Class 1 (n=392) | TIME 2 | 223 | 0.1 ± 0.1 | 169 | 0.1 ± 0.1 | 18,082 | 0.4933 | 1.0000 | -0.13 |
| NS | 5_7 | Class 1 (n=392) | TIME 3 | 223 | 0.1 ± 0.1 | 169 | 0.2 ± 0.1 | 14,788 | 0.0003 | 0.0016 | -0.44 |
| NS | 3_5 | Class 1 (n=756) | TIME 1 | 441 | 0.1 ± 0.1 | 315 | 0.1 ± 0.1 | 75,426 | 0.0438 | 0.2629 | 0.23 |
| NS | 3_5 | Class 1 (n=756) | TIME 2 | 441 | 0.1 ± 0.1 | 315 | 0.1 ± 0.1 | 66,535 | 0.3235 | 1.0000 | -0.05 |
| NS | 3_5 | Class 1 (n=756) | TIME 3 | 441 | 0.1 ± 0.1 | 315 | 0.1 ± 0.1 | 54,913 | <0.0001 | <0.0001 | -0.45 |
| NS | 5_7 | Class 2 (n=111) | TIME 1 | 41 | 1.2 ± 1.1 | 70 | 1.1 ± 1.4 | 1,719 | 0.0838 | 0.5027 | 0.08 |
| NS | 5_7 | Class 2 (n=111) | TIME 2 | 41 | 1.0 ± 0.8 | 70 | 1.2 ± 1.0 | 1,400 | 0.8330 | 1.0000 | -0.19 |
| NS | 5_7 | Class 2 (n=111) | TIME 3 | 41 | 1.0 ± 0.9 | 70 | 1.7 ± 1.3 | 804 | 0.0001 | 0.0007 | -0.62 |
| NS | 3_5 | Class 2 (n=261) | TIME 1 | 121 | 1.0 ± 0.9 | 140 | 1.1 ± 1.1 | 8,580 | 0.8578 | 1.0000 | -0.12 |
| NS | 3_5 | Class 2 (n=261) | TIME 2 | 121 | 0.9 ± 0.7 | 140 | 1.3 ± 1.1 | 6,749 | 0.0047 | 0.0279 | -0.46 |
| NS | 3_5 | Class 2 (n=261) | TIME 3 | 121 | 0.9 ± 0.7 | 140 | 1.5 ± 1.1 | 5,299 | <0.0001 | <0.0001 | -0.59 |
| PSM | 5_7 | Class 1 (n=360) | TIME 1 | 62 | 0.4 ± 0.6 | 298 | 0.4 ± 0.9 | 9,175 | 0.9332 | 1.0000 | -0.08 |
| PSM | 5_7 | Class 1 (n=360) | TIME 2 | 62 | 0.4 ± 0.6 | 298 | 0.5 ± 0.8 | 8,544 | 0.3519 | 1.0000 | -0.17 |
| PSM | 5_7 | Class 1 (n=360) | TIME 3 | 62 | 0.4 ± 0.7 | 298 | 0.6 ± 1.0 | 7,473 | 0.0179 | 0.0538 | -0.29 |
| PSM | 3_5 | Class 1 (n=454) | TIME 1 | 67 | 0.1 ± 0.1 | 387 | 0.1 ± 0.1 | 14,206 | 0.2107 | 1.0000 | 0.31 |
| PSM | 3_5 | Class 1 (n=454) | TIME 2 | 67 | 0.1 ± 0.1 | 387 | 0.1 ± 0.1 | 12,282 | 0.4912 | 1.0000 | -0.10 |
| PSM | 3_5 | Class 1 (n=454) | TIME 3 | 67 | 0.1 ± 0.1 | 387 | 0.2 ± 0.1 | 10,669 | 0.0206 | 0.1238 | -0.40 |
| PSM | 3_5 | Class 2 (n=207) | TIME 1 | 20 | 1.0 ± 0.5 | 187 | 1.1 ± 1.1 | 2,152 | 0.2697 | 1.0000 | -0.10 |
| PSM | 3_5 | Class 2 (n=207) | TIME 2 | 20 | 0.9 ± 0.5 | 187 | 1.3 ± 1.1 | 1,680 | 0.4567 | 1.0000 | -0.37 |
| PSM | 3_5 | Class 2 (n=207) | TIME 3 | 20 | 0.8 ± 0.5 | 187 | 1.5 ± 1.1 | 1,022 | 0.0009 | 0.0052 | -0.65 |
| renal_disease | 5_7 | Class 1 (n=135) | TIME 1 | 71 | 0.1 ± 0.1 | 64 | 0.1 ± 0.1 | 1,954 | 0.1618 | 0.9707 | -0.05 |
| renal_disease | 5_7 | Class 1 (n=135) | TIME 2 | 71 | 0.1 ± 0.1 | 64 | 0.2 ± 0.1 | 1,692 | 0.0107 | 0.0640 | -0.35 |
| renal_disease | 5_7 | Class 1 (n=135) | TIME 3 | 71 | 0.1 ± 0.1 | 64 | 0.2 ± 0.2 | 1,636 | 0.0051 | 0.0306 | -0.42 |
| renal_disease | 3_5 | Class 1 (n=248) | TIME 1 | 121 | 0.2 ± 0.1 | 127 | 0.1 ± 0.1 | 8,955 | 0.0244 | 0.1464 | 0.44 |
| renal_disease | 3_5 | Class 1 (n=248) | TIME 2 | 121 | 0.1 ± 0.1 | 127 | 0.1 ± 0.1 | 7,519 | 0.7715 | 1.0000 | -0.05 |
| renal_disease | 3_5 | Class 1 (n=248) | TIME 3 | 121 | 0.1 ± 0.1 | 127 | 0.2 ± 0.1 | 6,017 | 0.0032 | 0.0190 | -0.49 |
| renal_disease | 5_7 | Class 2 (n=26) | TIME 1 | 11 | 1.2 ± 0.9 | 15 | 1.5 ± 1.6 | 79 | 0.8763 | 1.0000 | -0.26 |
| renal_disease | 5_7 | Class 2 (n=26) | TIME 2 | 11 | 0.9 ± 0.5 | 15 | 1.7 ± 1.4 | 48 | 0.0776 | 0.4658 | -0.71 |
| renal_disease | 5_7 | Class 2 (n=26) | TIME 3 | 11 | 1.0 ± 0.4 | 15 | 2.1 ± 1.4 | 37 | 0.0195 | 0.1171 | -1.05 |
| renal_disease | 3_5 | Class 2 (n=60) | TIME 1 | 21 | 1.2 ± 1.3 | 39 | 1.0 ± 1.4 | 508 | 0.1288 | 0.7728 | 0.15 |
| renal_disease | 3_5 | Class 2 (n=60) | TIME 2 | 21 | 0.9 ± 0.7 | 39 | 1.1 ± 1.1 | 399 | 0.8768 | 1.0000 | -0.20 |
| renal_disease | 3_5 | Class 2 (n=60) | TIME 3 | 21 | 0.9 ± 0.8 | 39 | 1.3 ± 1.0 | 255 | 0.0170 | 0.1020 | -0.46 |
| severe_liver_disease | 3_5 | Class 1 (n=186) | TIME 1 | 139 | 0.4 ± 0.2 | 47 | 0.3 ± 0.2 | 3,491 | 0.4836 | 1.0000 | 0.10 |
| severe_liver_disease | 3_5 | Class 1 (n=186) | TIME 2 | 139 | 0.3 ± 0.2 | 47 | 0.4 ± 0.2 | 2,676 | 0.0642 | 0.3853 | -0.29 |
| severe_liver_disease | 3_5 | Class 1 (n=186) | TIME 3 | 139 | 0.3 ± 0.3 | 47 | 0.5 ± 0.3 | 2,141 | 0.0004 | 0.0025 | -0.57 |
| severe_liver_disease | 3_5 | Class 2 (n=129) | TIME 1 | 63 | 1.9 ± 1.2 | 66 | 2.0 ± 1.3 | 1,982 | 0.6476 | 1.0000 | -0.12 |
| severe_liver_disease | 3_5 | Class 2 (n=129) | TIME 2 | 63 | 1.5 ± 1.1 | 66 | 2.2 ± 1.2 | 1,306 | 0.0003 | 0.0016 | -0.59 |
| severe_liver_disease | 3_5 | Class 2 (n=129) | TIME 3 | 63 | 1.5 ± 1.1 | 66 | 2.3 ± 1.1 | 1,047 | <0.0001 | <0.0001 | -0.74 |

Note: Cohen’s d indicates effect size: 0.0–0.2 = Negligible/Very Small, 0.2–0.5 = Small, 0.5–0.8 = Medium, >0.8 = Large. All *p*-values are Bonferroni-adjusted for 6 multiple comparisons. Effect sizes interpreted using Cohen’s d (Negligible/ Small/ Medium/ Large).

**sTable 10.** **Paired t-test Results for HTR Across Time Points.**

| Items | Group | At Admission | Last Within 7d | *P*-value |
| --- | --- | --- | --- | --- |
| Age < 60 | Survival | 0.374 (0.349–0.4) | 0.408 (0.381–0.435) | 0.1540 |
| Age < 60 | Death | 0.713 (0.576–0.85) | 0.906 (0.766–1.045) | <0.0001 |
| Age > 60 | Survival | 0.206 (0.194–0.218) | 0.245 (0.231–0.26) | <0.0001 |
| Age > 60 | Death | 0.325 (0.274–0.375) | 0.493 (0.429–0.556) | <0.0001 |
| BMI ≥24.9 | Survival | 0.327 (0.307–0.347) | 0.38 (0.358–0.403) | 0.0010 |
| BMI ≥24.9 | Death | 0.539 (0.456–0.622) | 0.717 (0.63–0.803) | <0.0001 |
| BMI 18.5-24.9 | Survival | 0.23 (0.213–0.247) | 0.243 (0.225–0.261) | 0.0100 |
| BMI 18.5-24.9 | Death | 0.298 (0.233–0.363) | 0.465 (0.374–0.556) | <0.0001 |
| Cancer | Survival | 0.261 (0.236–0.285) | 0.308 (0.28–0.336) | 0.0006 |
| Cancer | Death | 0.333 (0.271–0.395) | 0.546 (0.443–0.649) | <0.0001 |
| Chronic pulmonary disease | Survival | 0.269 (0.237–0.301) | 0.32 (0.283–0.357) | <0.0001 |
| Chronic pulmonary disease | Death | 0.301 (0.218–0.384) | 0.458 (0.362–0.554) | <0.0001 |
| Congestive heart failure | Survival | 0.178 (0.166–0.189) | 0.22 (0.203–0.237) | 0.0070 |
| Congestive heart failure | Death | 0.244 (0.198–0.289) | 0.419 (0.351–0.487) | <0.0001 |
| Diabetes | Survival | 0.234 (0.213–0.256) | 0.269 (0.246–0.292) | 0.0001 |
| Diabetes | Death | 0.368 (0.278–0.458) | 0.5 (0.411–0.589) | <0.0001 |
| Gender 0 | Survival | 0.276 (0.256–0.295) | 0.311 (0.288–0.335) | 0.6420 |
| Gender 0 | Death | 0.462 (0.373–0.552) | 0.619 (0.524–0.713) | <0.0001 |
| Gender 1 | Survival | 0.276 (0.256–0.295) | 0.311 (0.288–0.335) | 0.6420 |
| Gender 1 | Death | 0.462 (0.373–0.552) | 0.619 (0.524–0.713) | <0.0001 |
| HIS | Survival | 0.148 (0.14–0.155) | 0.162 (0.15–0.173) | <0.0001 |
| HIS | Death | 0.269 (0.199–0.339) | 0.514 (0.391–0.637) | <0.0001 |
| MIMIC | Survival | 0.382 (0.36–0.404) | 0.437 (0.413–0.46) | <0.0001 |
| MIMIC | Death | 0.487 (0.42–0.555) | 0.643 (0.571–0.714) | <0.0001 |
| NC | Survival | 0.323 (0.295–0.351) | 0.363 (0.332–0.395) | 0.0250 |
| NC | Death | 0.534 (0.405–0.663) | 0.759 (0.608–0.909) | <0.0001 |
| Non-severe liver disease | Survival | 0.16 (0.153–0.167) | 0.189 (0.18–0.198) | 0.4230 |
| Non-severe liver disease | Death | 0.22 (0.189–0.25) | 0.375 (0.329–0.421) | <0.0001 |
| NS | Survival | 0.331 (0.31–0.351) | 0.39 (0.367–0.412) | <0.0001 |
| NS | Death | 0.418 (0.356–0.479) | 0.58 (0.511–0.648) | <0.0001 |
| PSM | Survival | 0.36 (0.316–0.403) | 0.449 (0.395–0.504) | <0.0001 |
| PSM | Death | 0.436 (0.381–0.491) | 0.61 (0.549–0.672) | <0.0001 |
| Renal disease | Survival | 0.283 (0.251–0.315) | 0.347 (0.309–0.385) | <0.0001 |
| Renal disease | Death | 0.345 (0.245–0.445) | 0.486 (0.384–0.588) | <0.0001 |
| Severe liver disease | Survival | 0.916 (0.854–0.979) | 0.992 (0.927–1.056) | 0.0002 |
| Severe liver disease | Death | 1.327 (1.126–1.528) | 1.584 (1.392–1.777) | <0.0001 |

Notes: Values are presented as mean (95% CI) and median (interquartile range).P-values are unadjusted for multiple comparisons.

# Supplement Figure

**sFigure 1.** **Depicts the flow of participants throughout the study.**


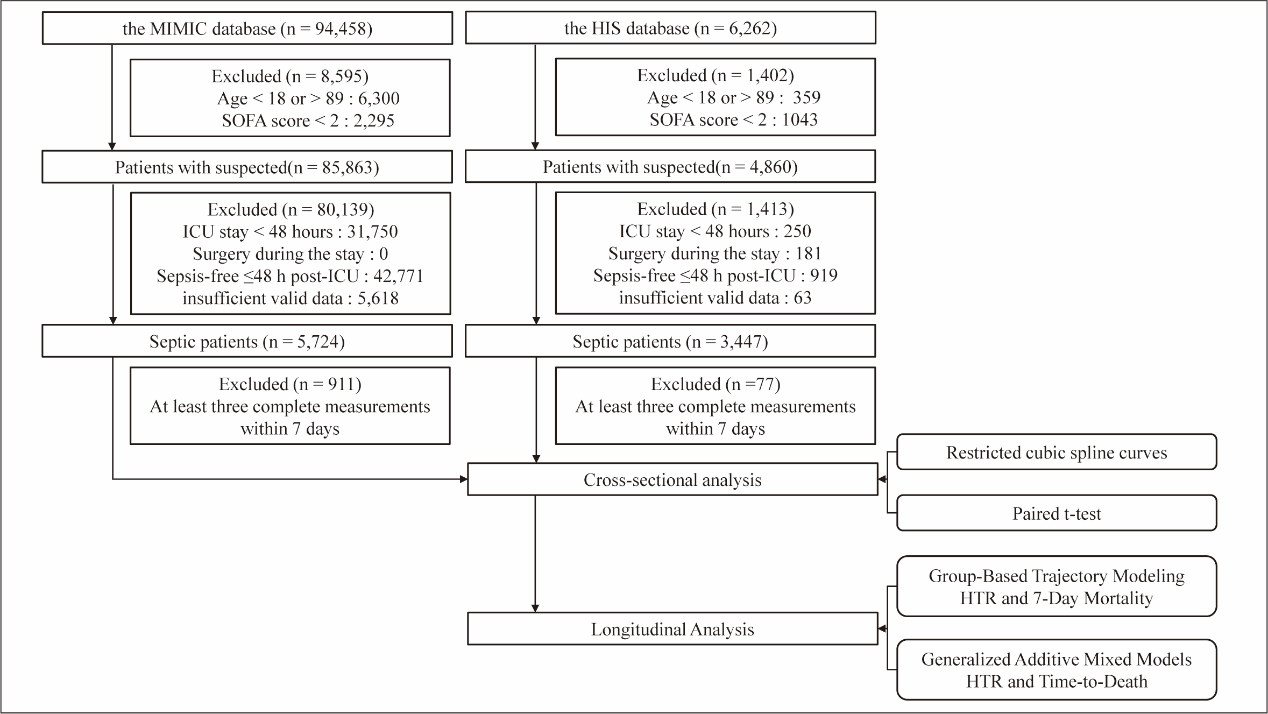


**sFigure 2.** **Patient Enrollment and Key Measurement Time Points**


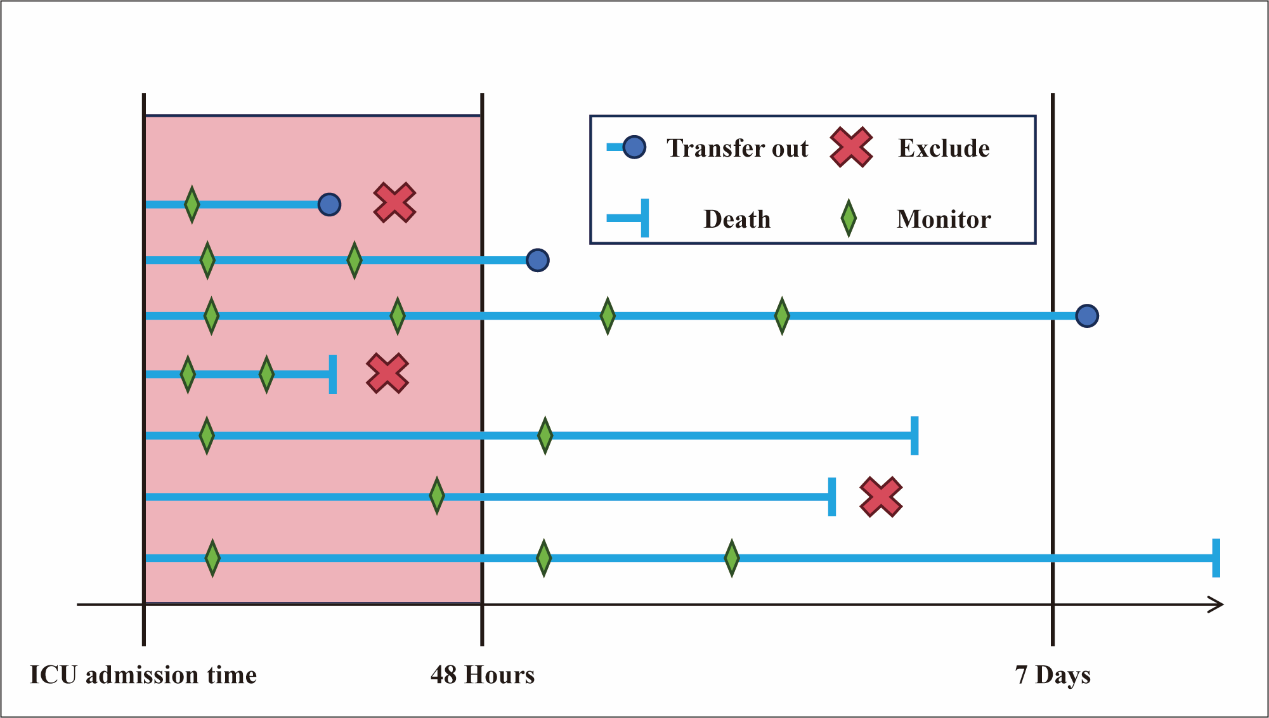


**sFigure 3.** **Sensitivity Analyses for Robustness (Non-Severe Liver Disease)**

**
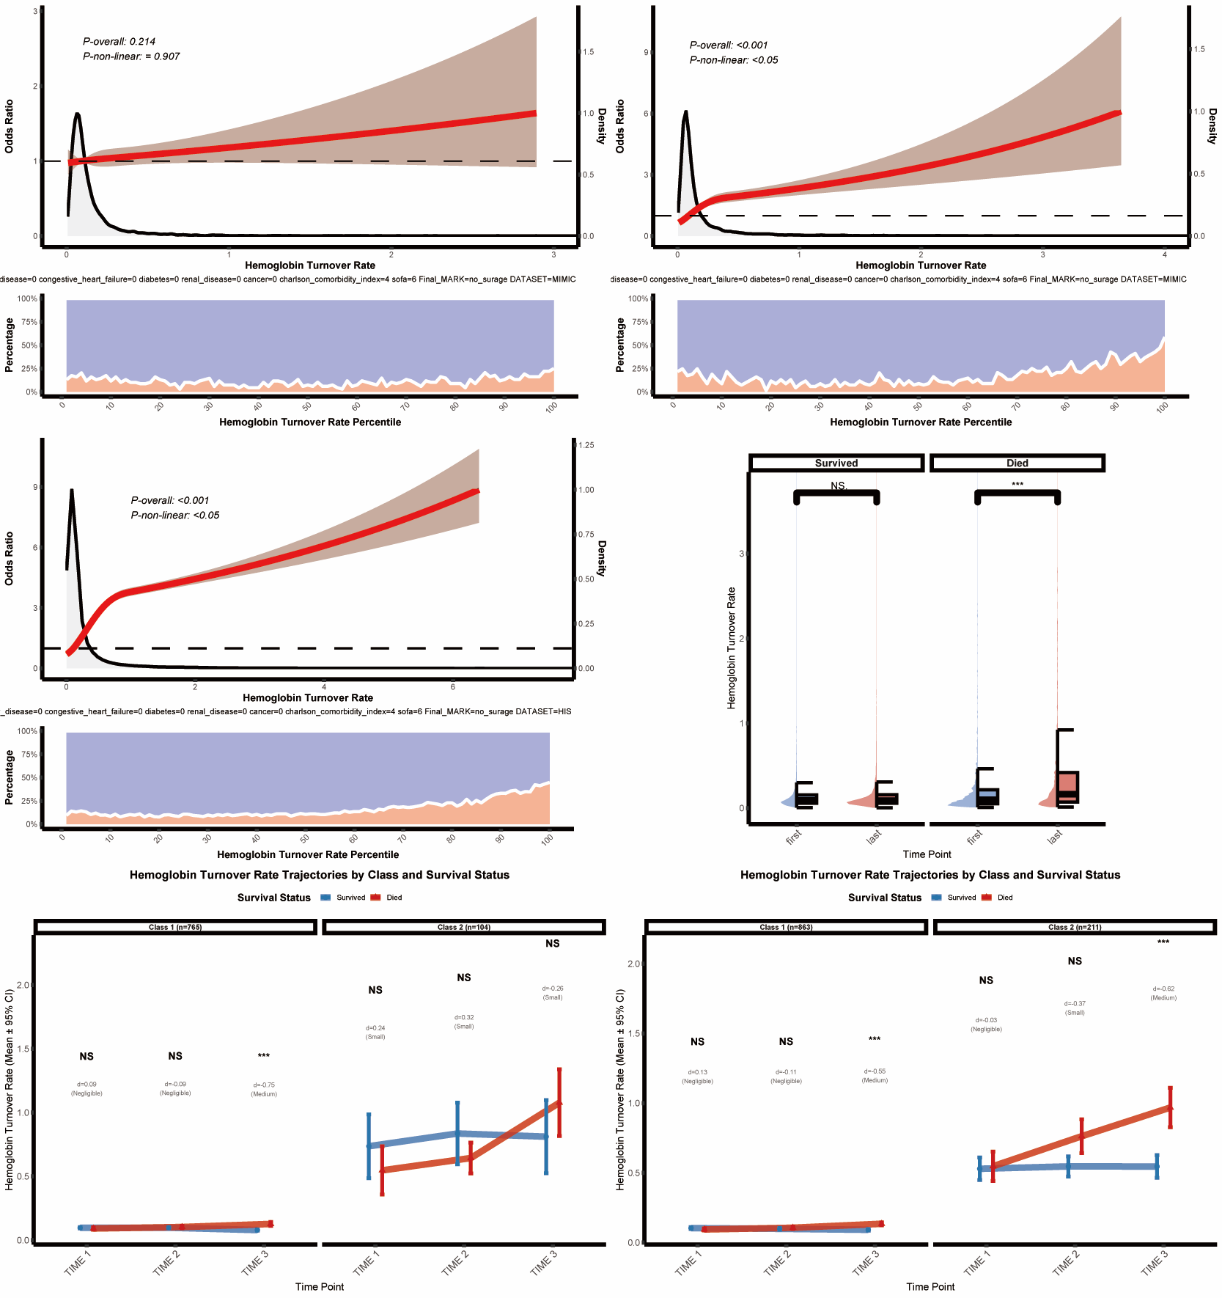
**

**sFigure 4. Sensitivity Analyses for Robustness (Propensity Score Matching)**

**
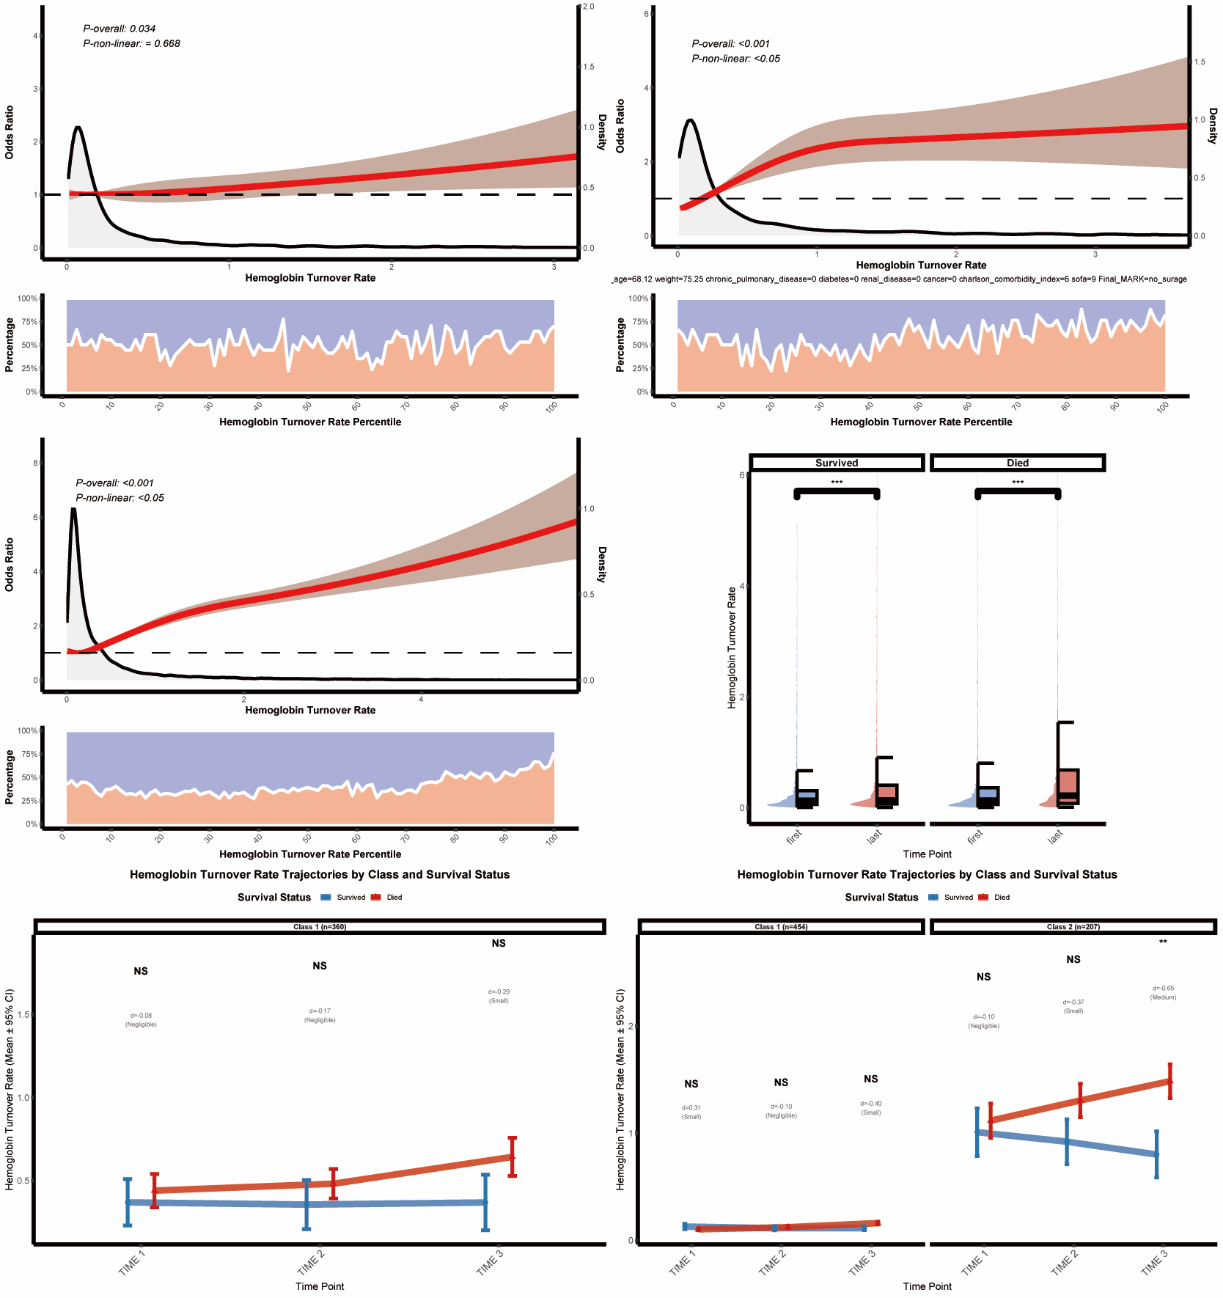
**

**sFigure 5.** **Subgroup Analysis (Severe Liver Disease)**


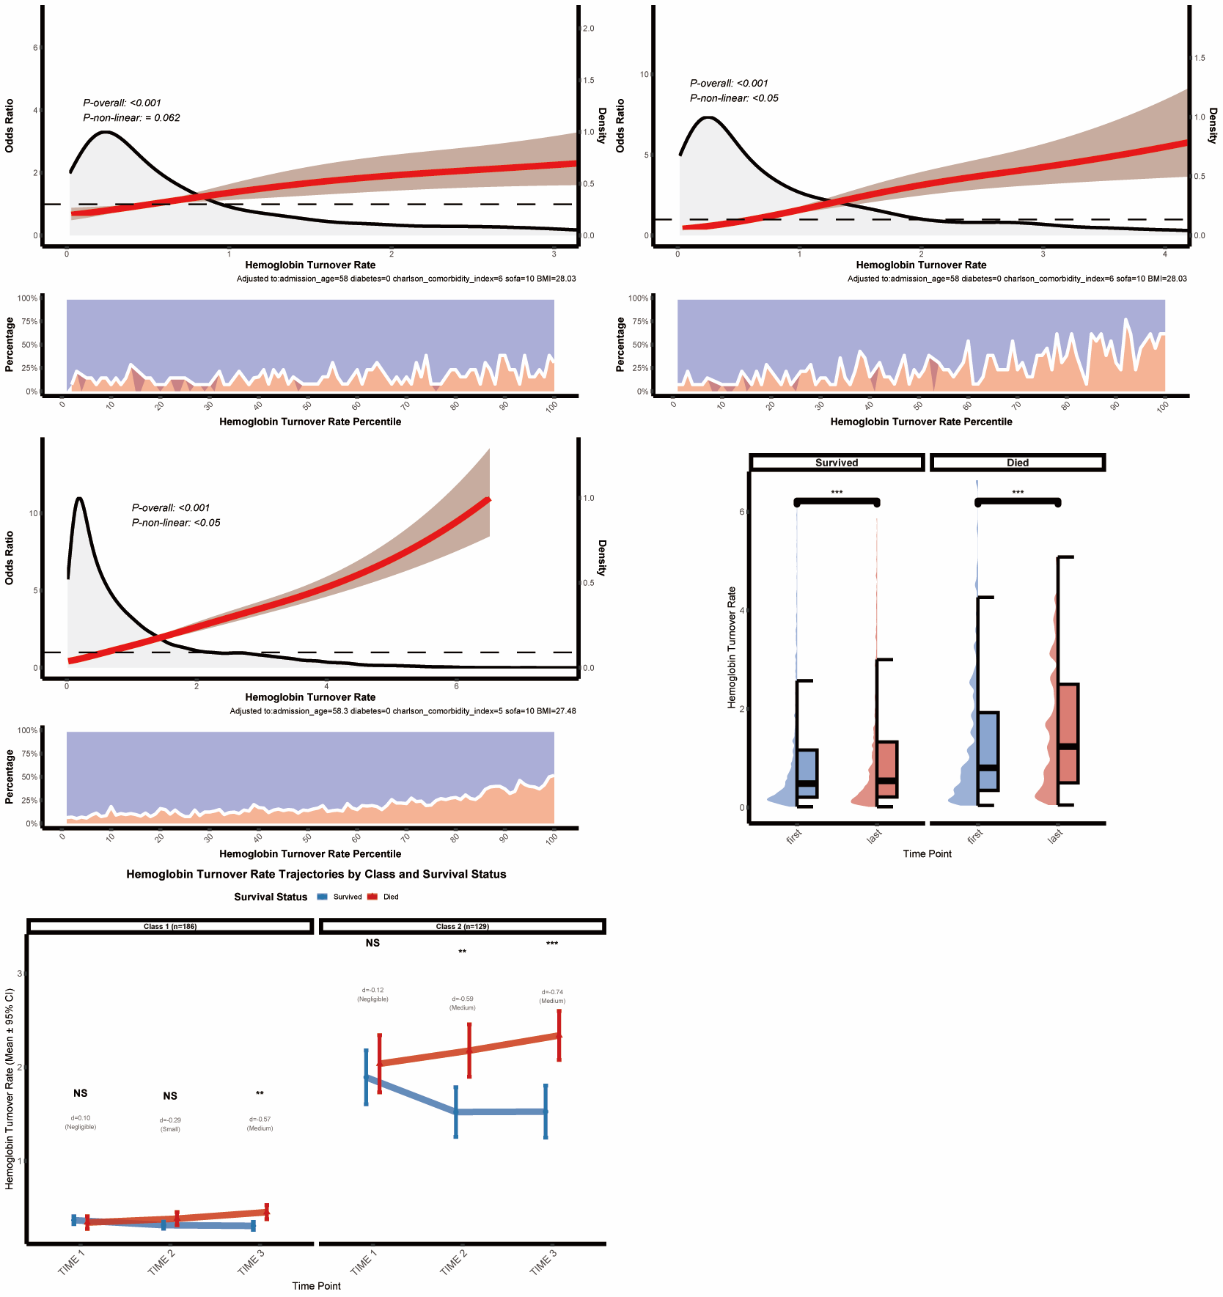


**sFigure 6.** **Subgroup Analysis (Renal Disease)**


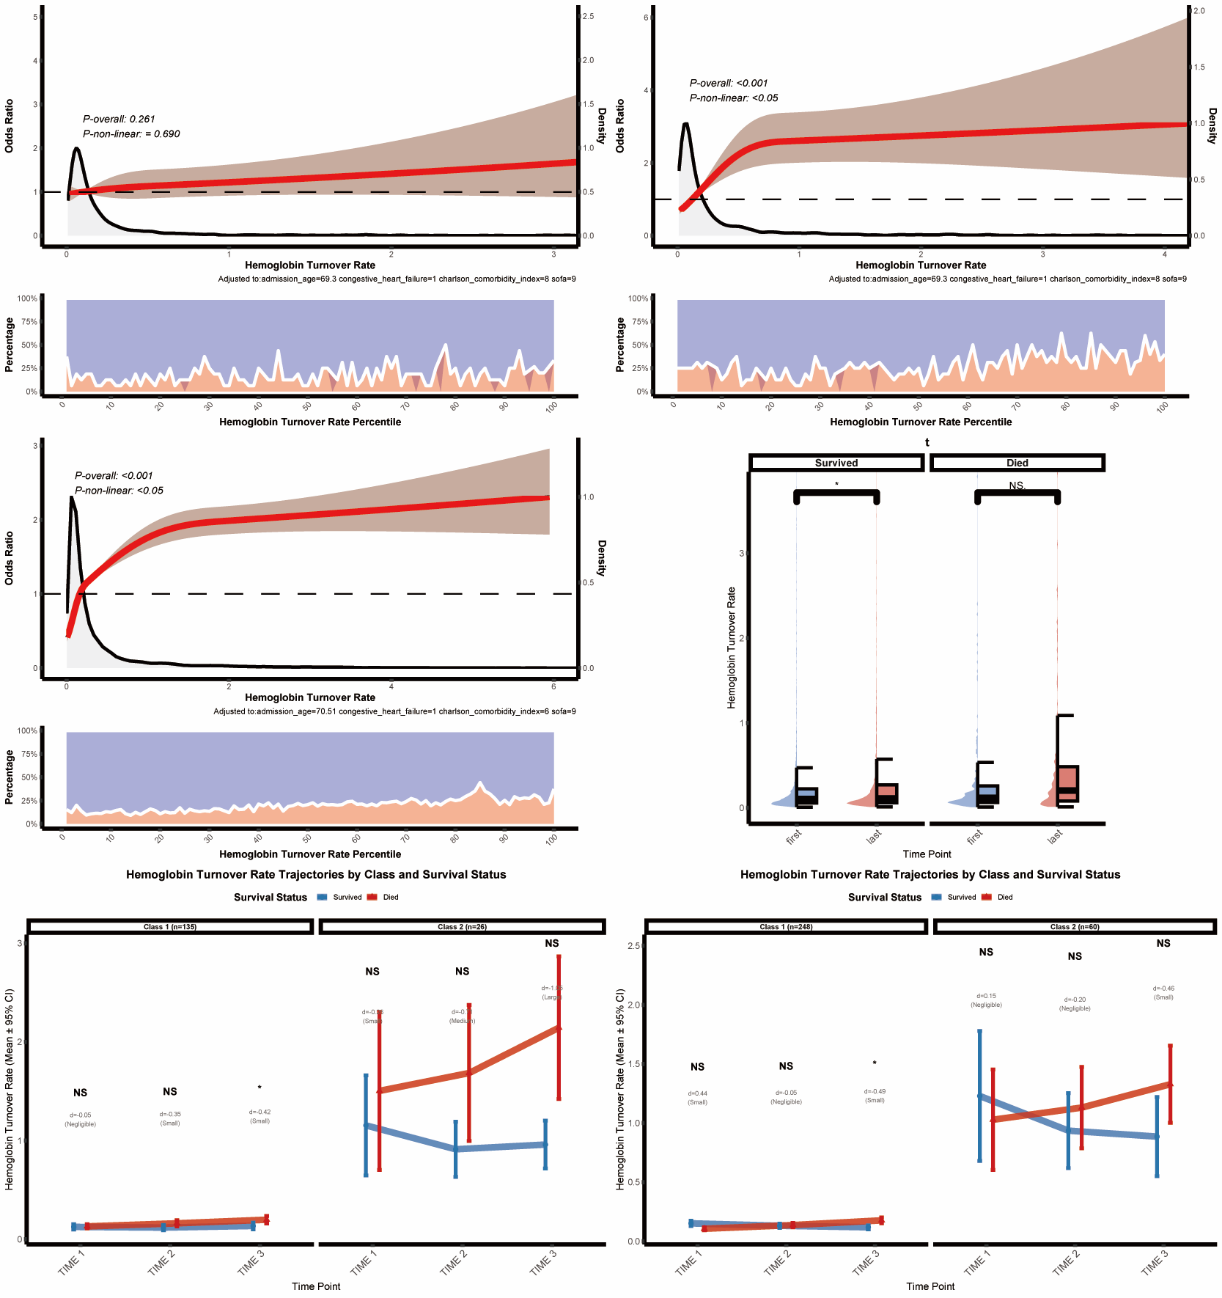


**sFigure 7.** **Subgroup Analysis (Congestive Heart Failure)**


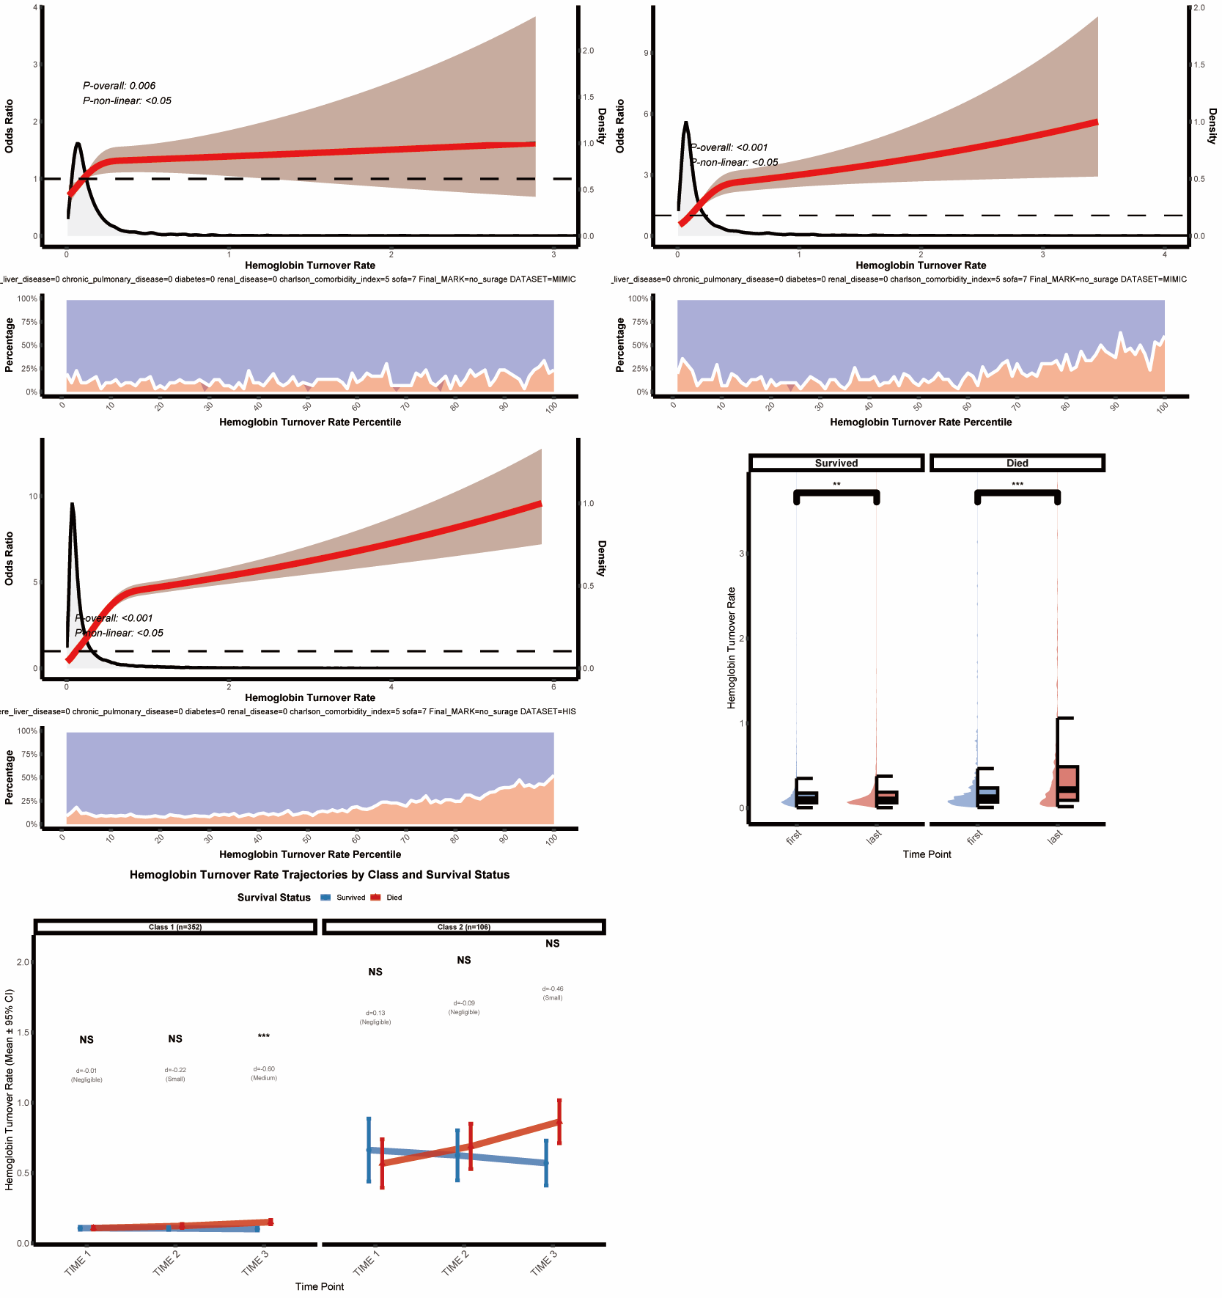


**sFigure 8.** **Subgroup Analysis (Cancer)**


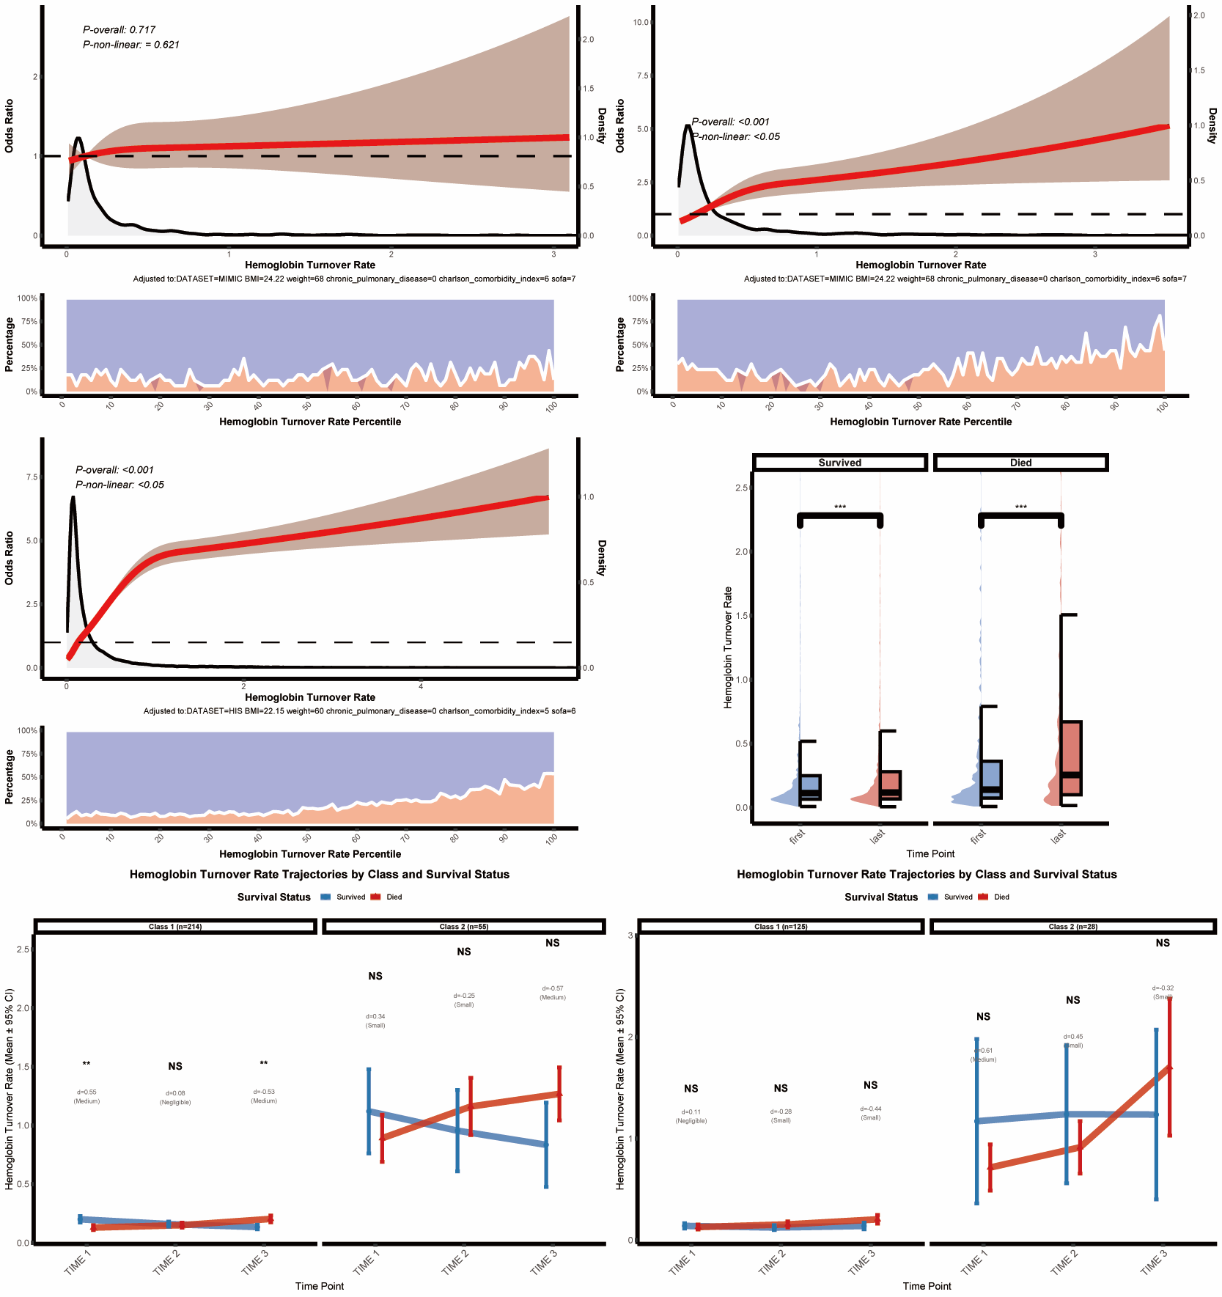


**sFigure 9.** **Subgroup Analysis (Chronic Pulmonary Disease)**


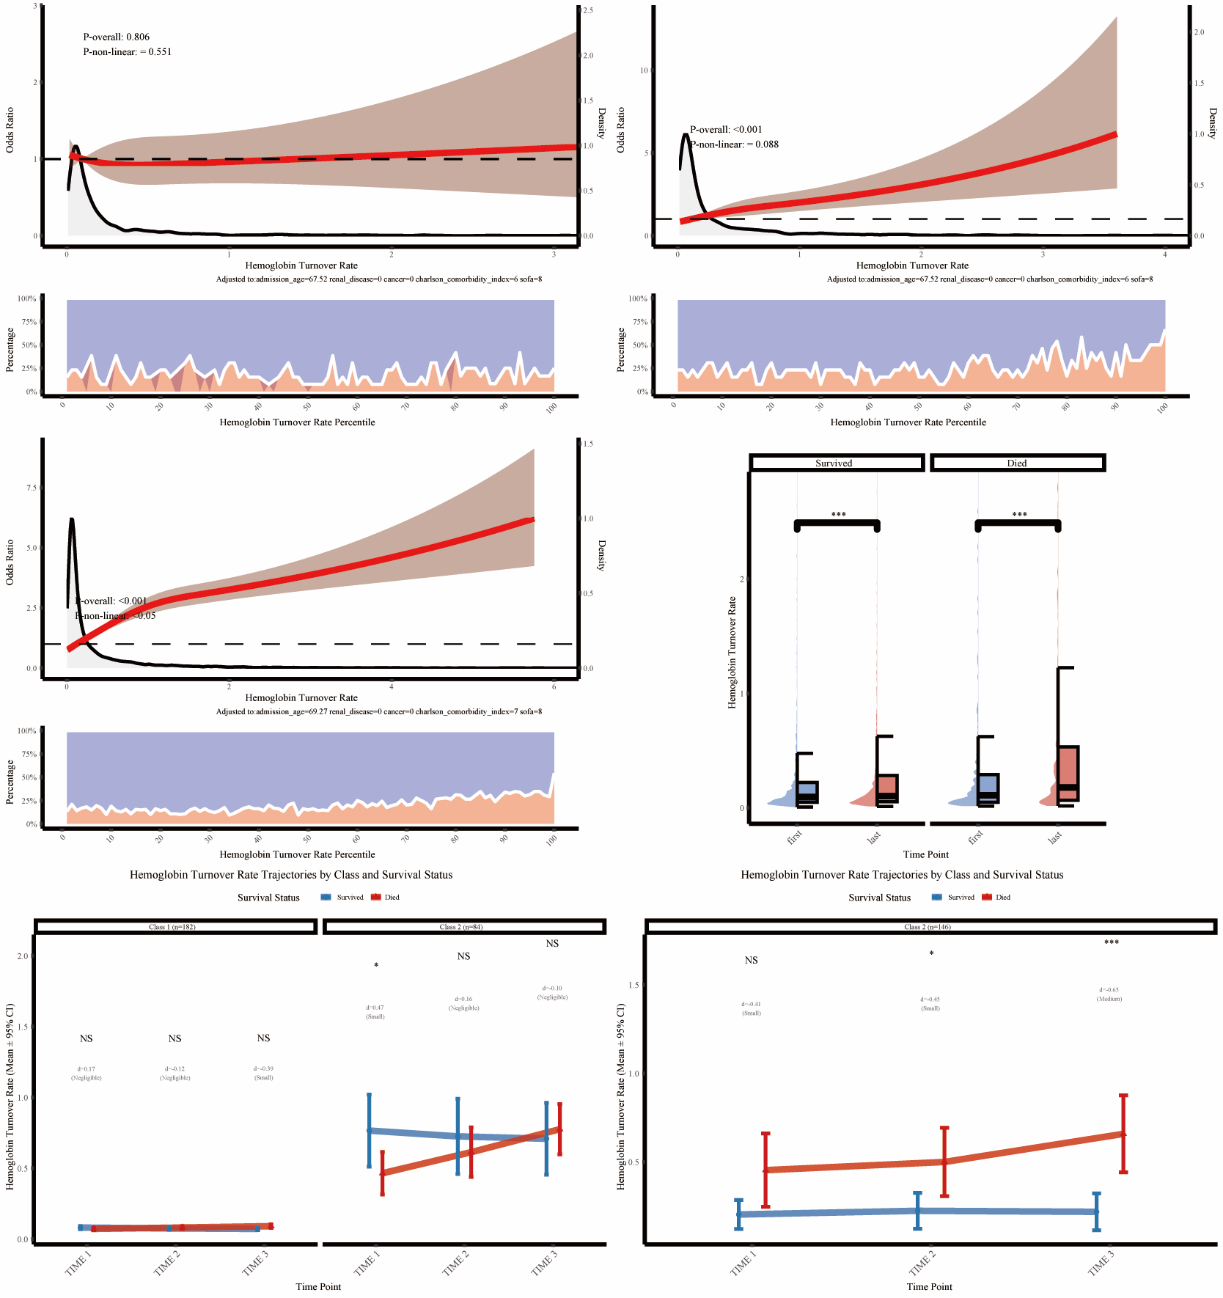


**sFigure 10.** **Subgroup Analysis (Diabetes)**


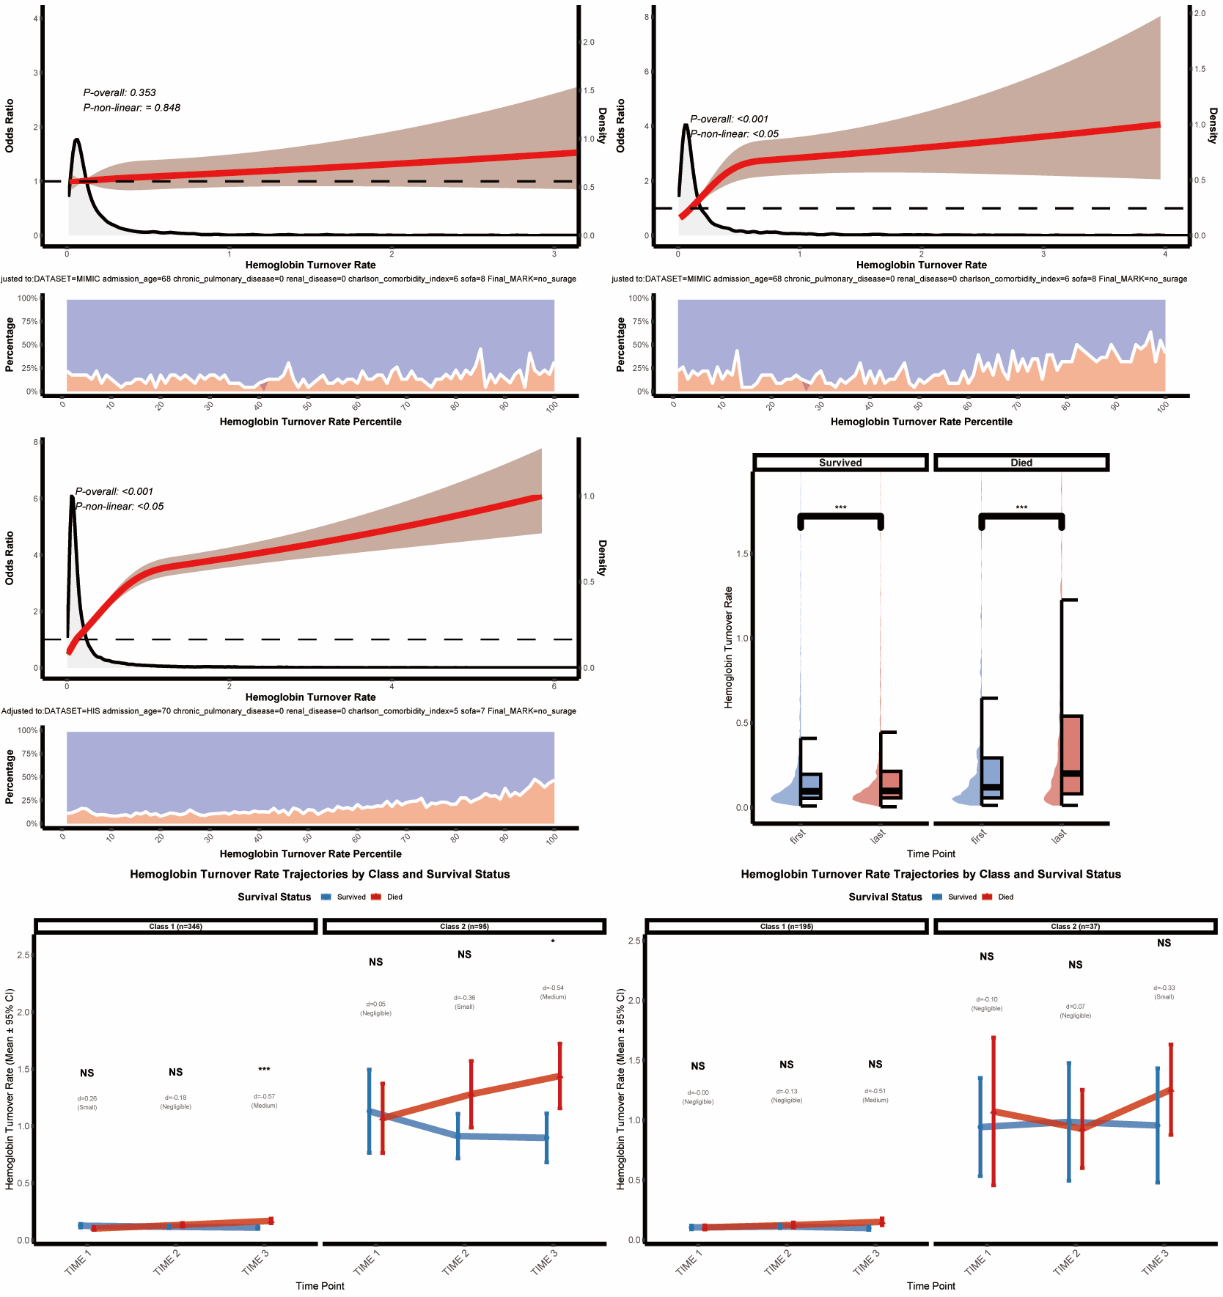


**sFigure 11.** **Subgroup Analysis (BMI 18.5–24.9 kg/m²)**


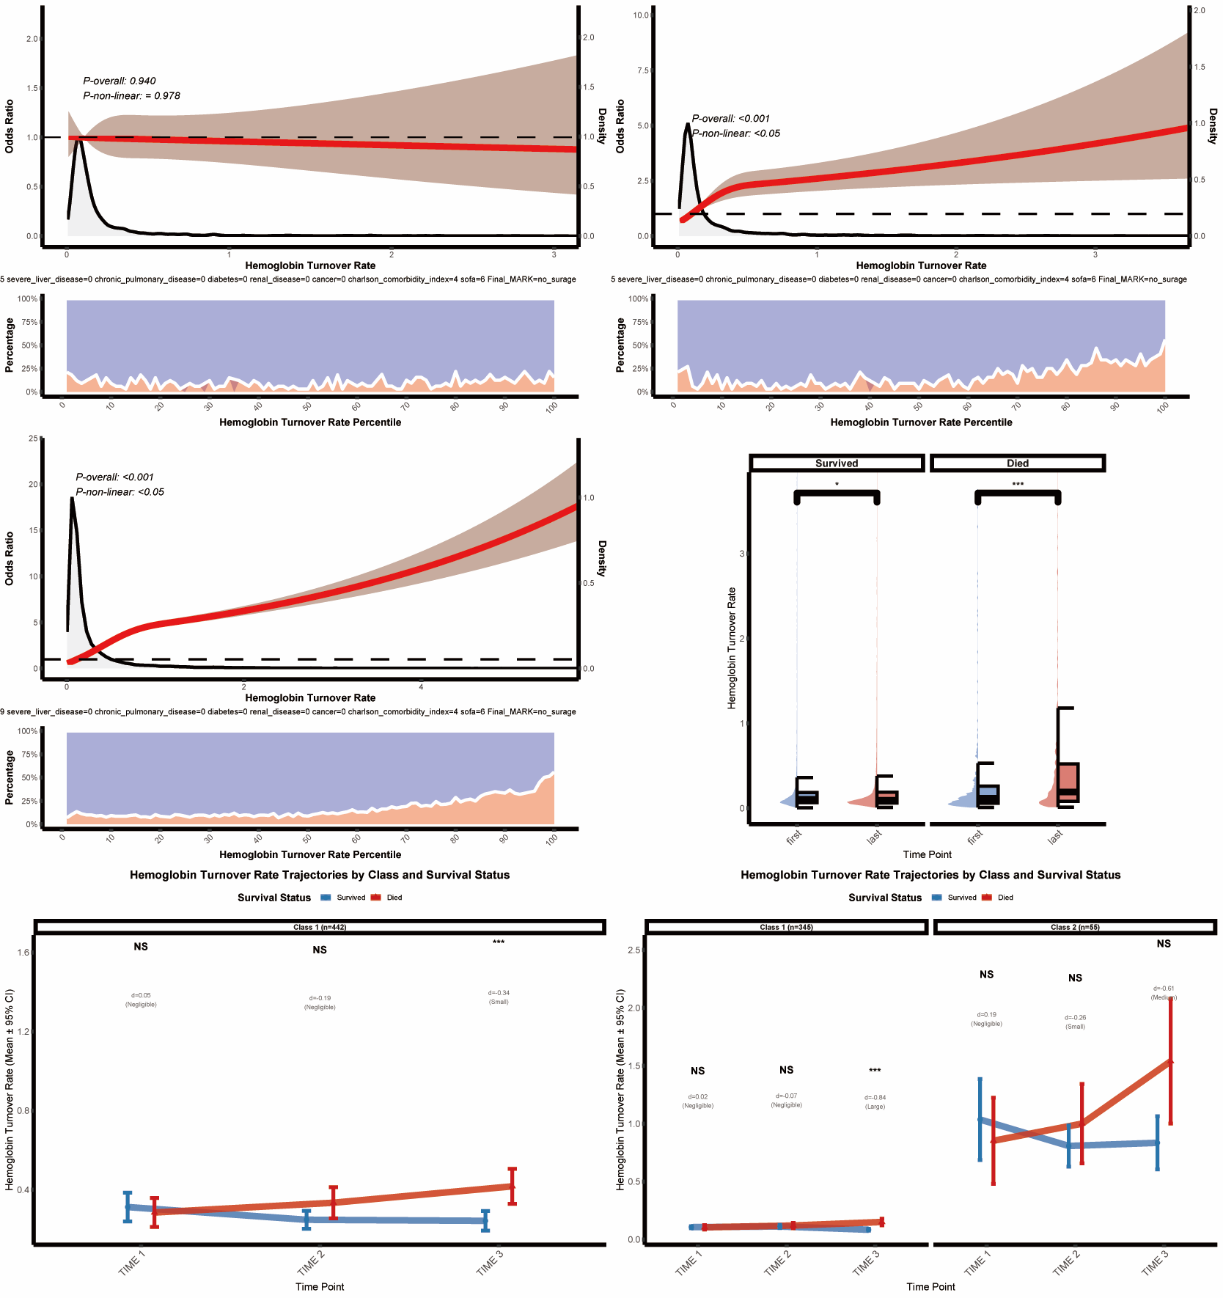


**sFigure 12.** **Subgroup Analysis (BMI ≥24.9 kg/m²)**


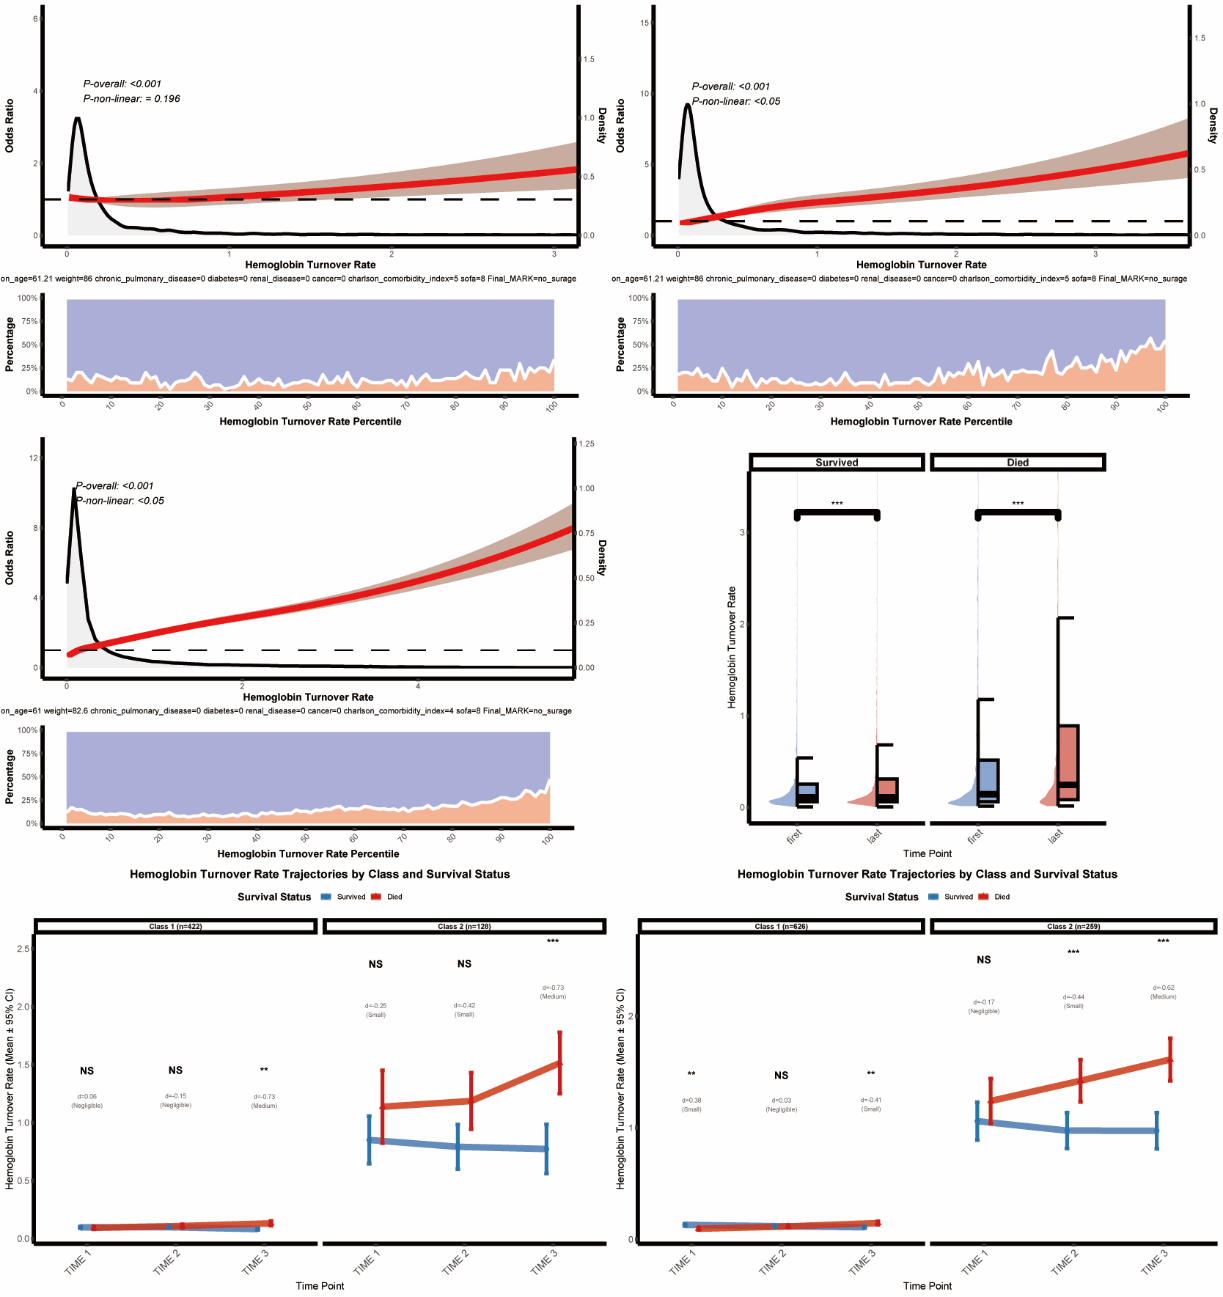


**sFigure 13.** **Subgroup Analysis (age <60 years)**


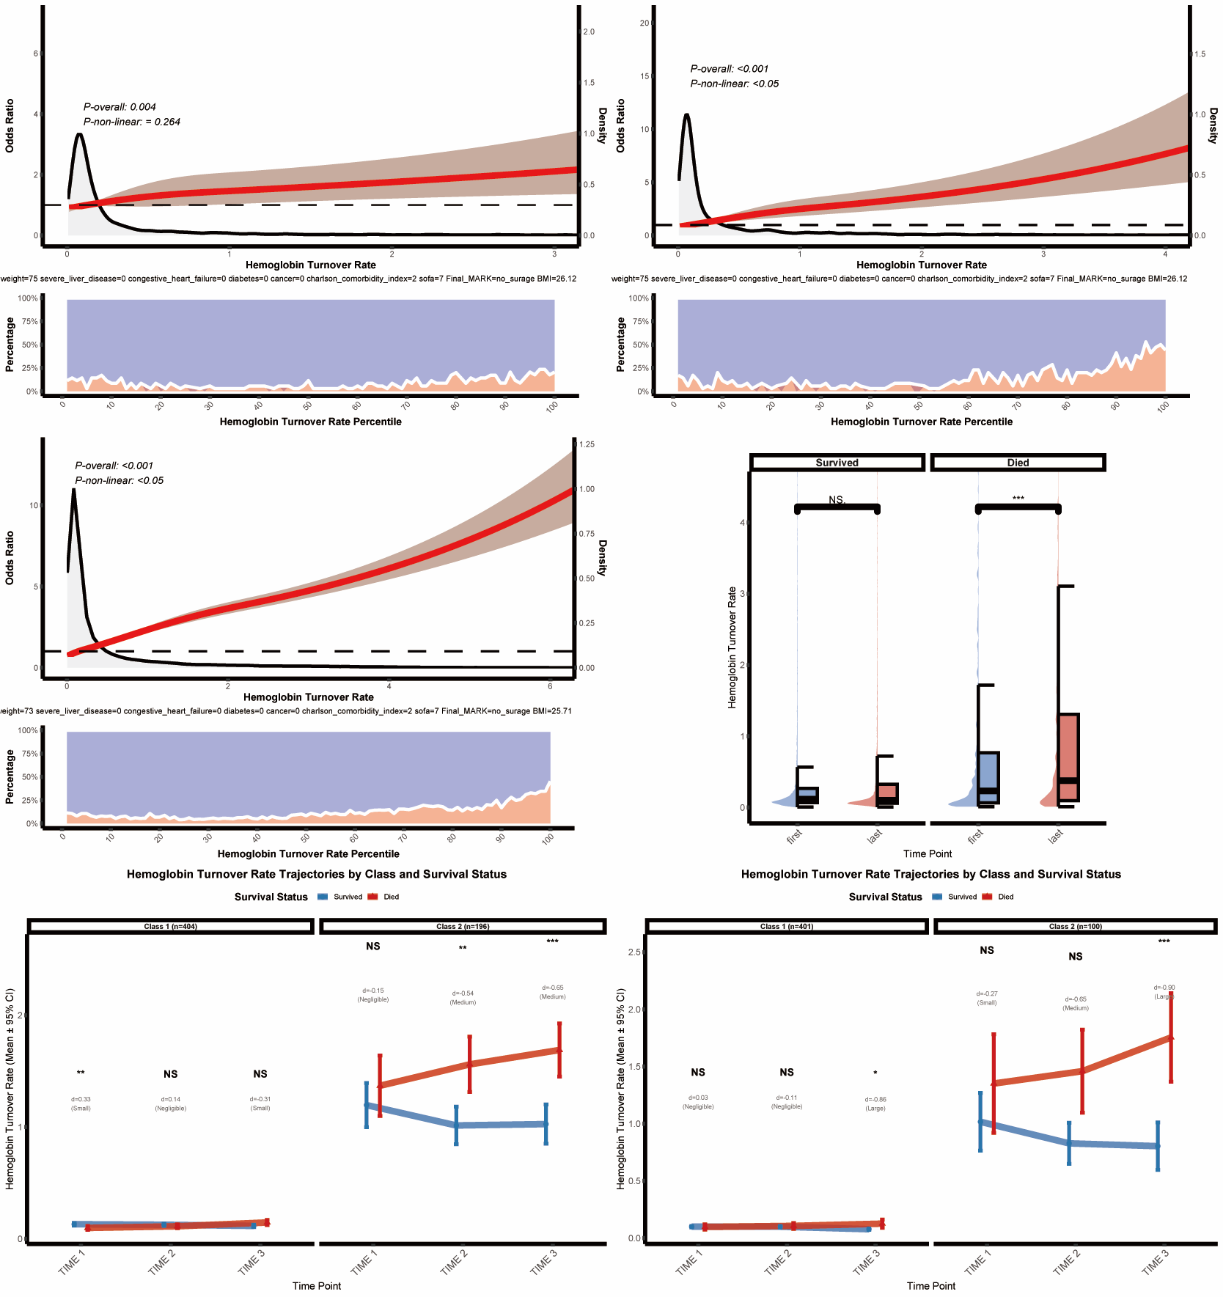


**sFigure 14.** **Subgroup Analysis (age ≥60 years)**


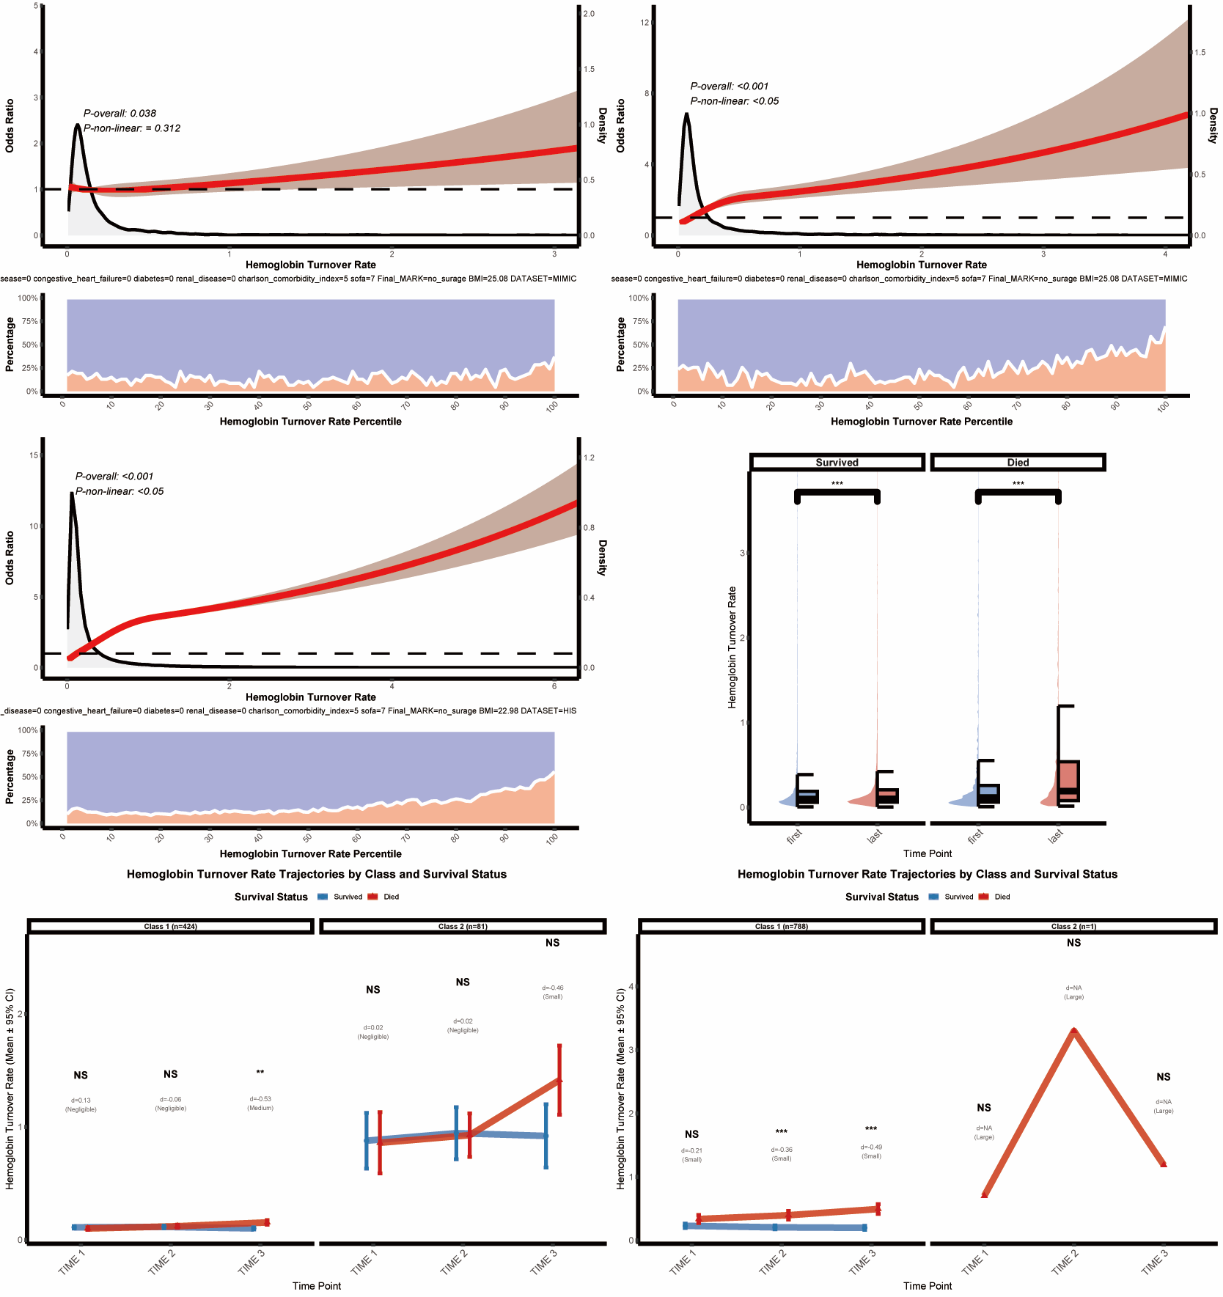


**sFigure 15.** **Subgroup Analysis (gender-male)**


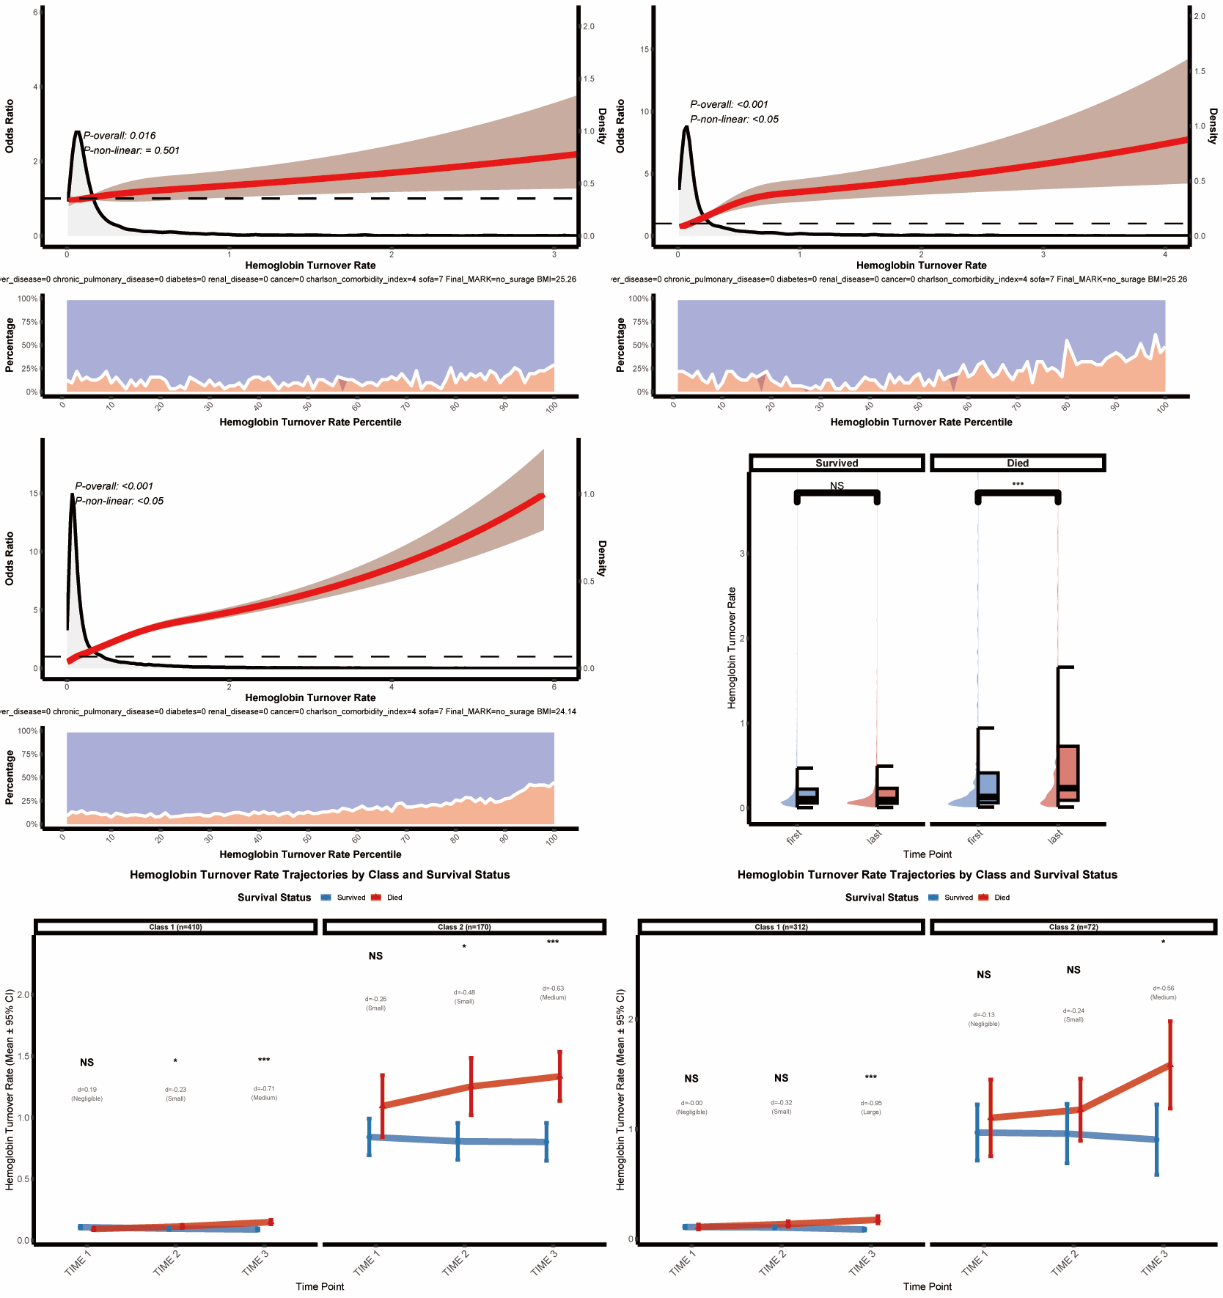


**sFigure 16.** **Subgroup Analysis (gender-female)**


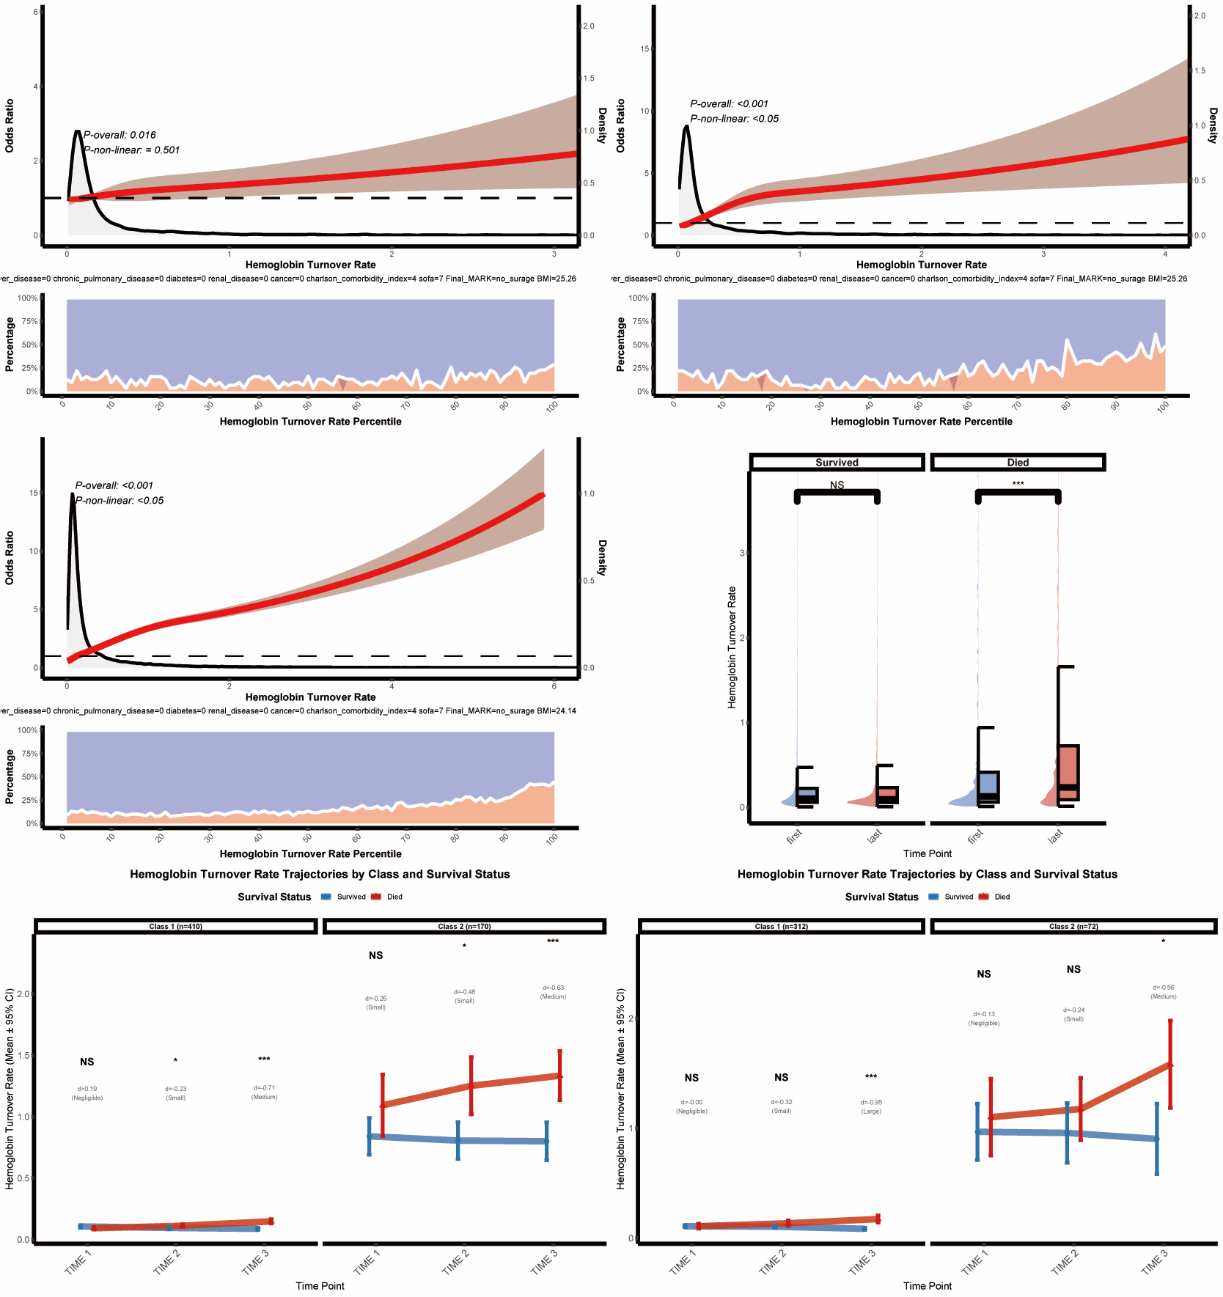


**sFigure 17.** **Subgroup Analysis (Non-Cardiac Surgery)**


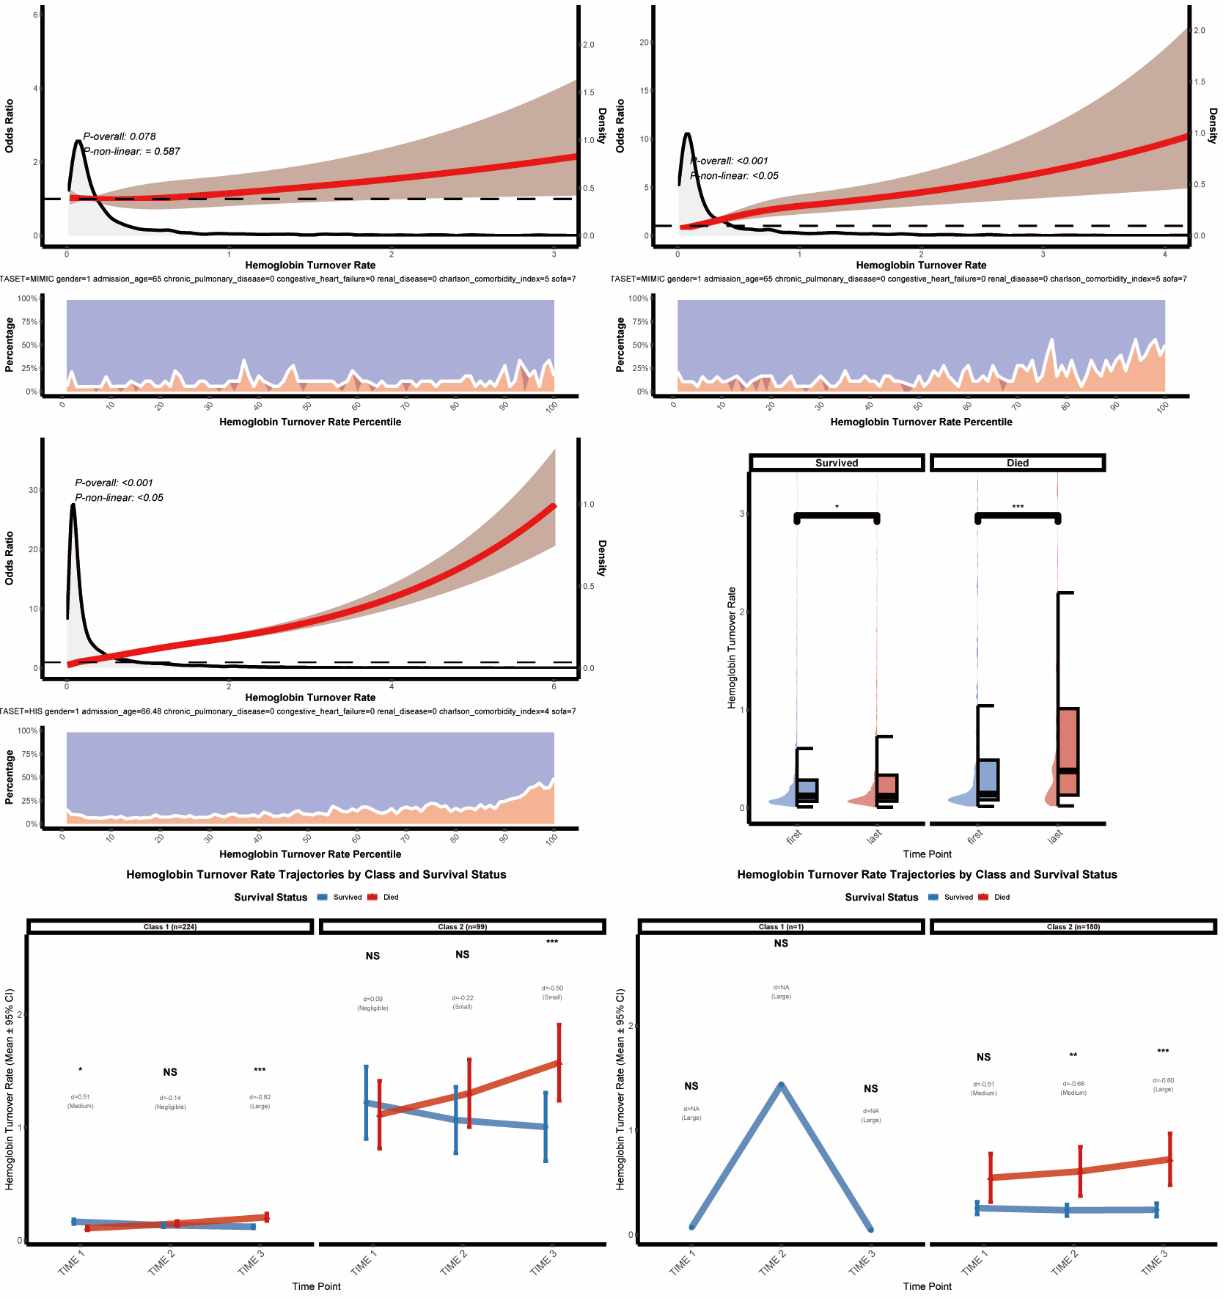


**sFigure 18.** **Subgroup Analysis (No Surgery)**


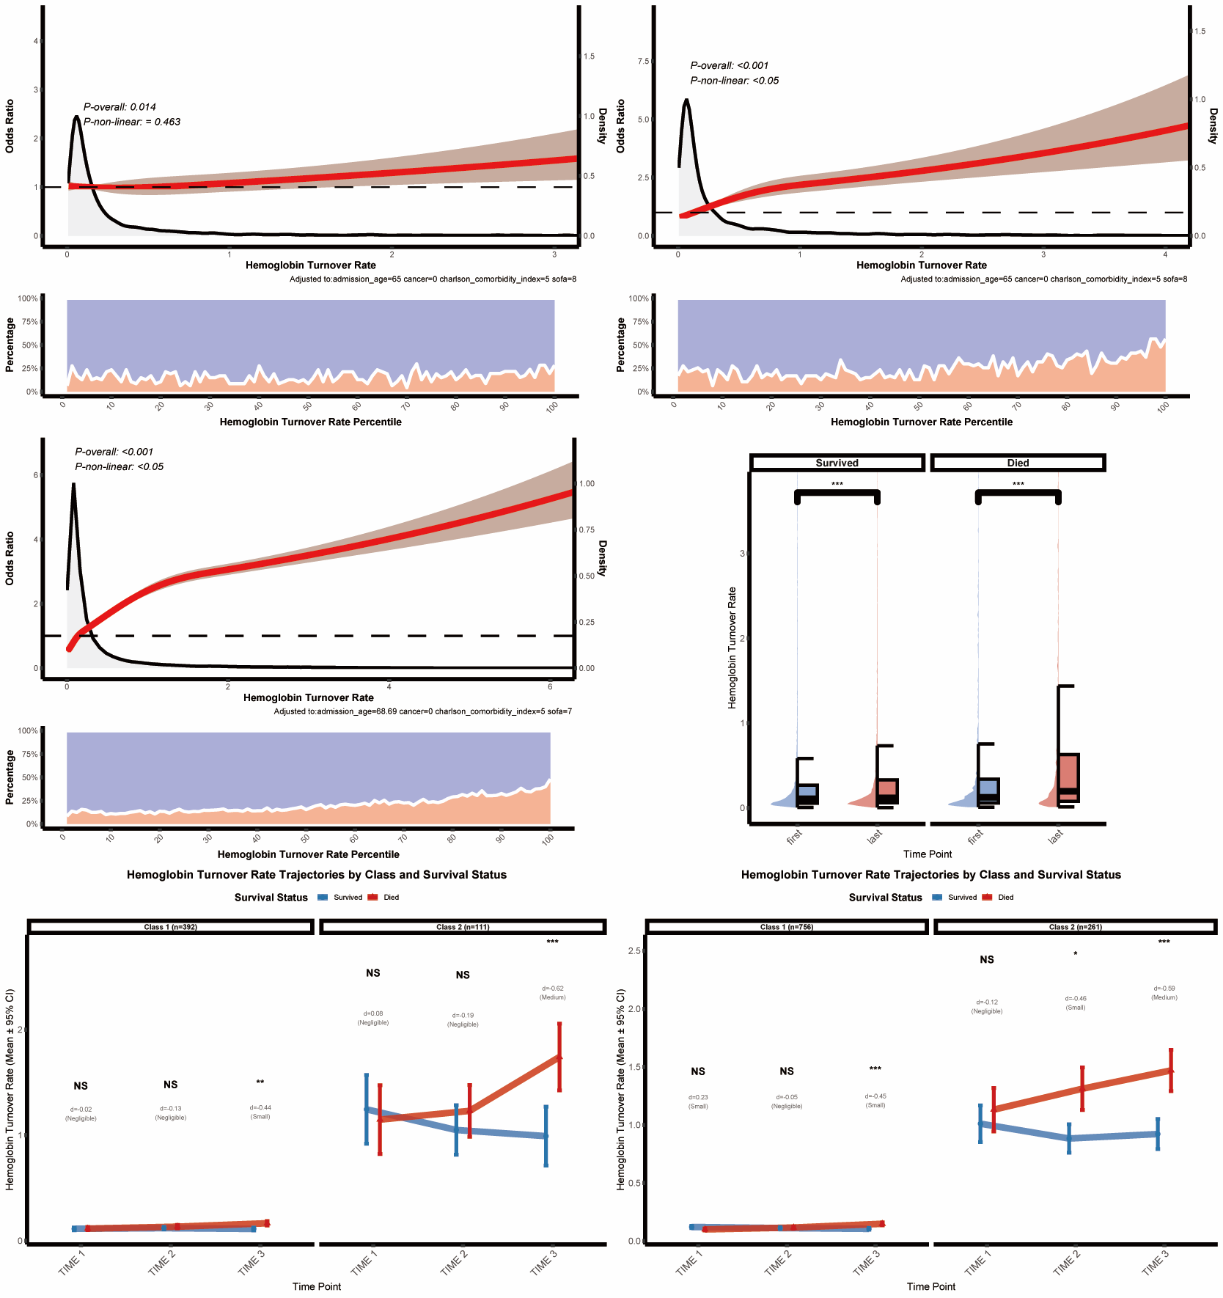


**sFigure 19.** **Subgroup Analysis (Dataset-MIMIC)**


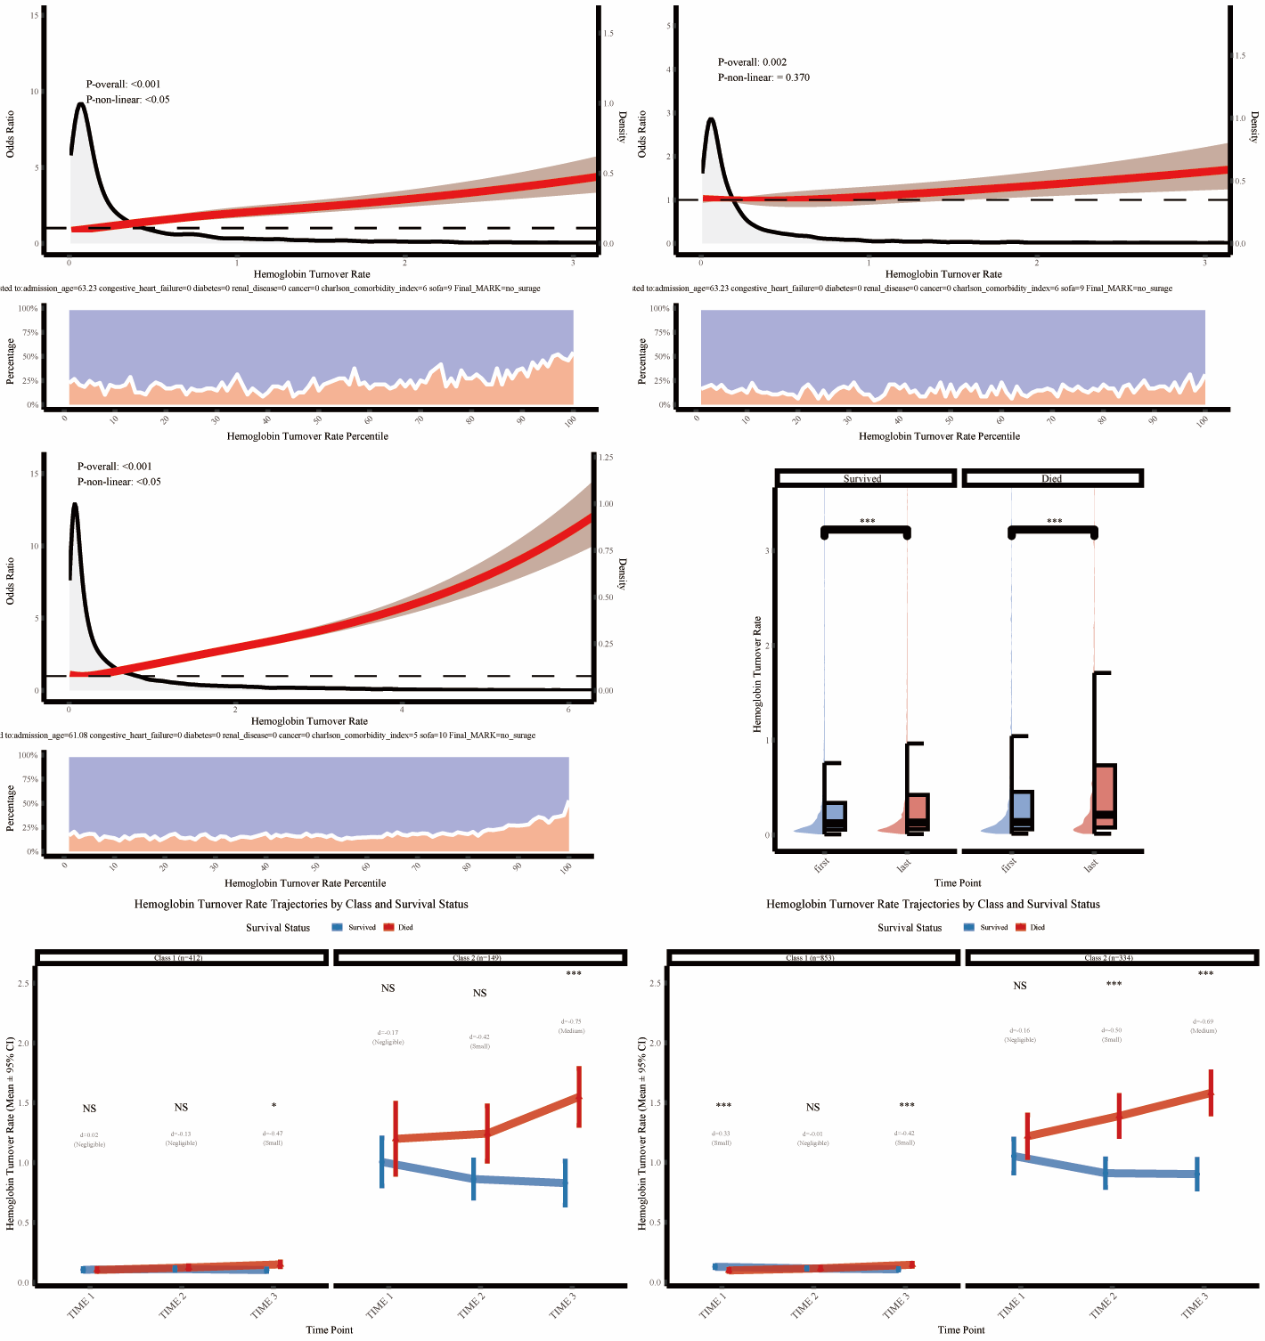


**sFigure 20.** **Subgroup Analysis (Dataset-HIS)**


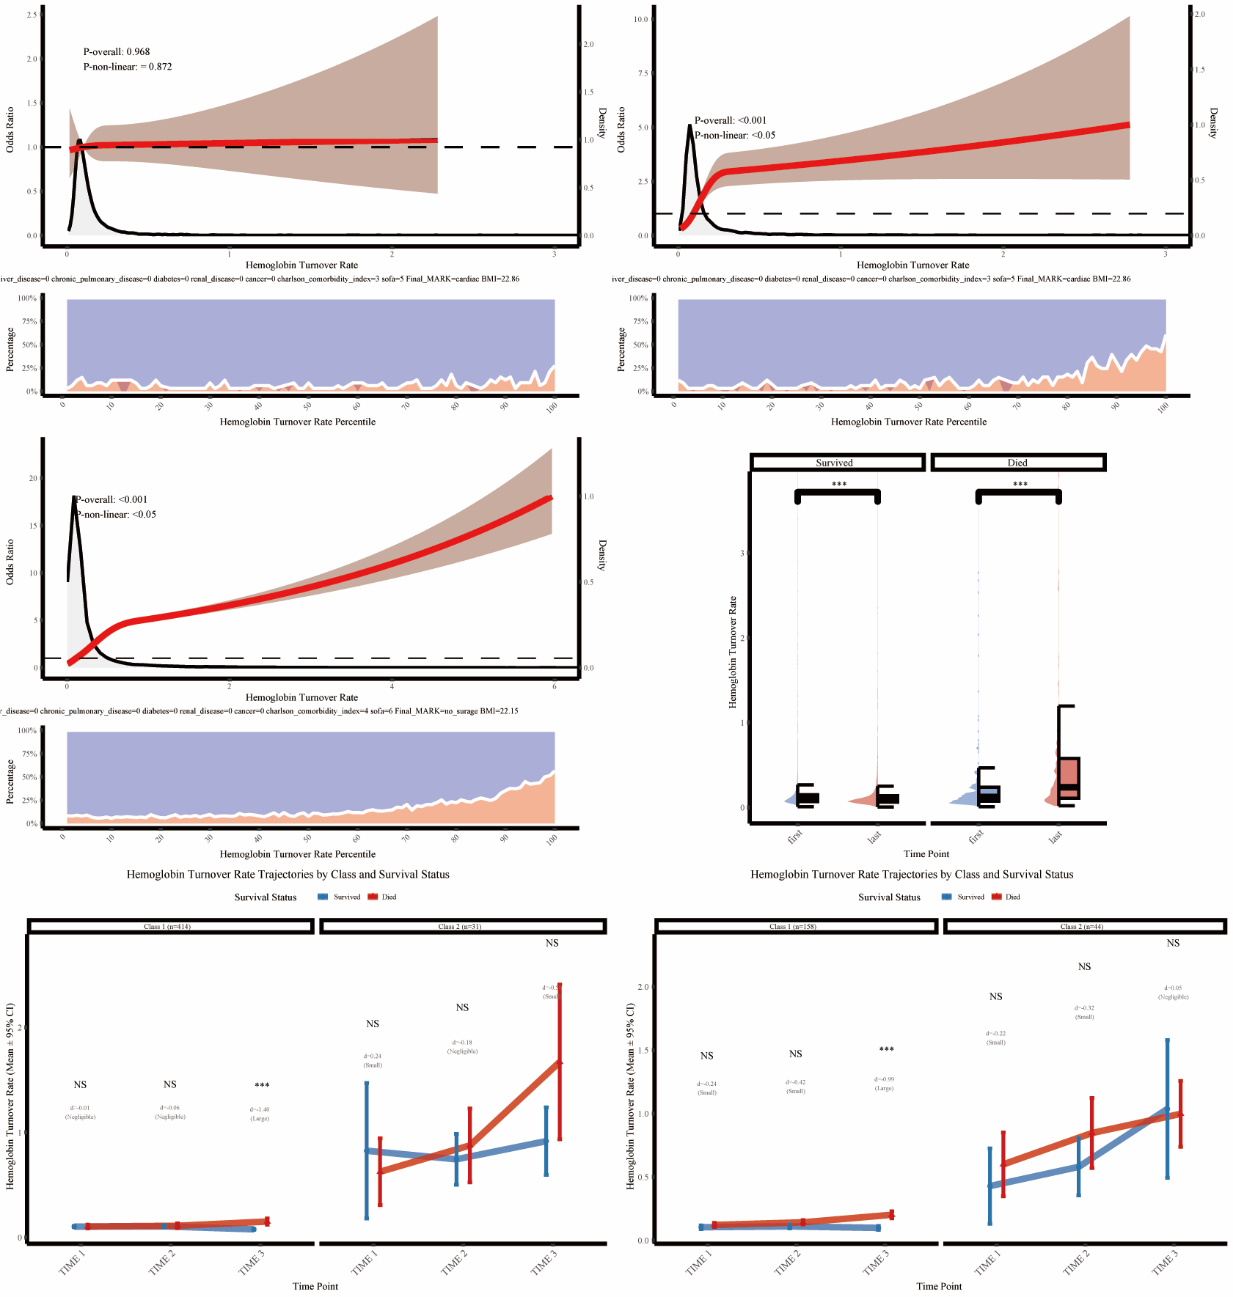


**sFigure 21.** **Subgroup trajectory analysis of HTR.**


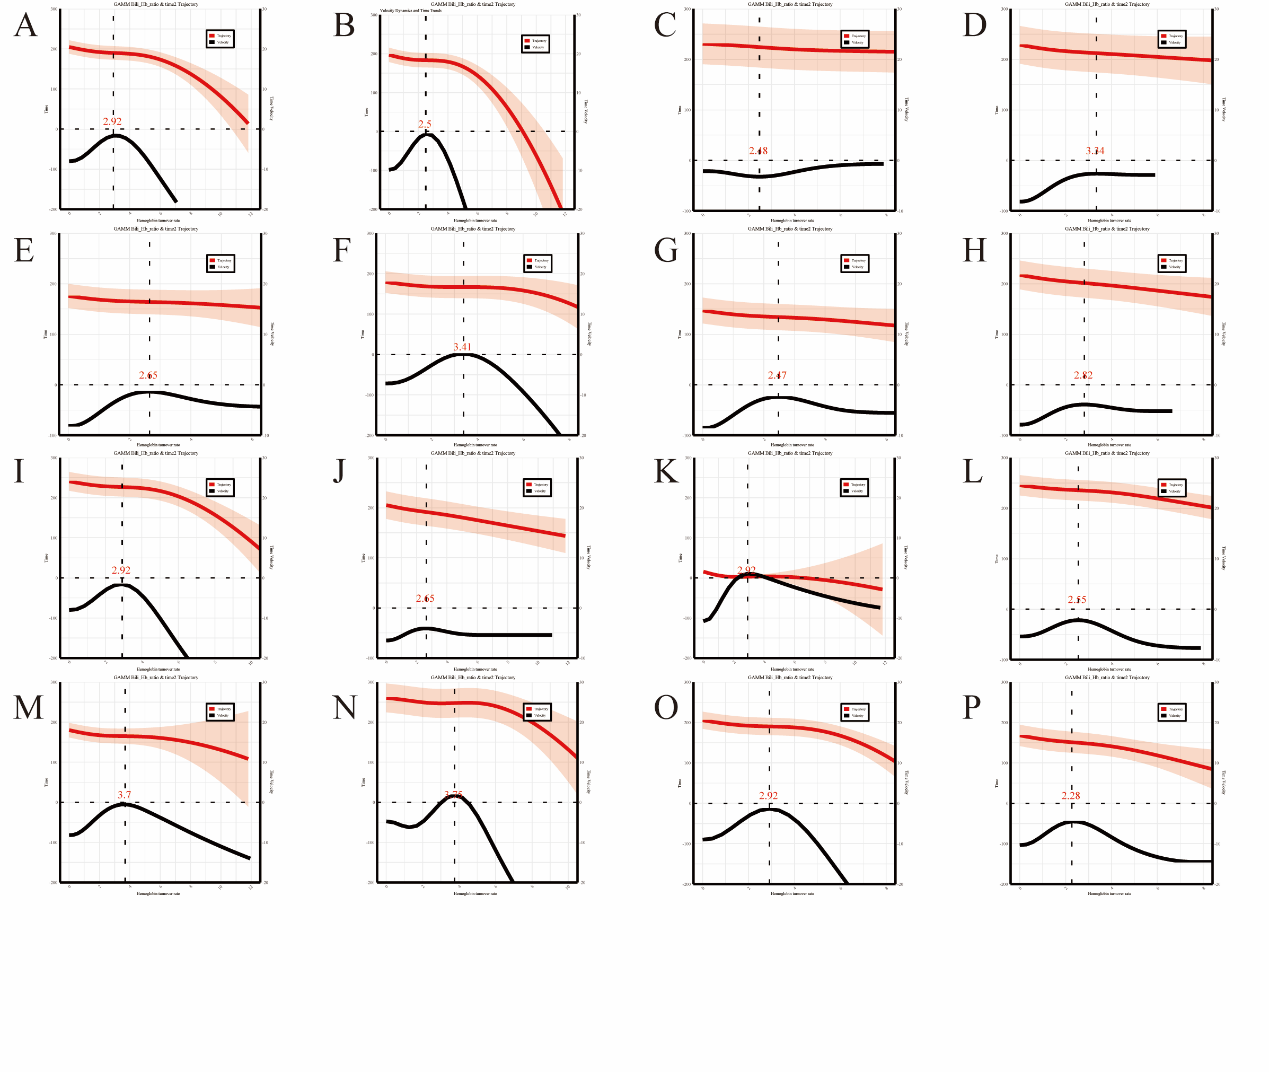


(A) All patients; (B) Patients without severe liver disease; (C) Patients with severe liver disease; (D) Patients with chronic pulmonary disease; (E) Patients with congestive heart failure; (F) Patients with renal disease; (G) Patients with cancer; (H) Patients with diabetes; (I) Male patients; (J) Female patients; (K) HIS dataset; (L) MIMIC dataset; (M) Age > 60 years; (N) Age ≤ 60 years; (O) BMI ≥ 24.9; (P) 18.5 < BMI < 24.9.
